# 1 **Wireless recording from unrestrained monkeys reveals motor goal encoding** 2 **beyond immediate reach in frontoparietal cortex**

3 Michael Berger<sup>1,2</sup>, Naubahar S. Agha<sup>1</sup> and Alexander Gail<sup>1,2,3,4</sup>

4 <sup>1</sup> Cognitive Neuroscience Laboratory, German Primate Center – Leibniz-Institute for Primate Research,  
5 Goettingen, Germany

6 <sup>2</sup> Faculty of Biology and Psychology, University of Goettingen, Goettingen, Germany

7 <sup>3</sup> Leibniz-ScienceCampus Primate Cognition, Goettingen, Germany

8 <sup>4</sup> Bernstein Center for Computational Neuroscience, Goettingen, Germany

9

10

11

12 Corresponding Author:

13 Michael Berger

14 Cognitive Neuroscience Laboratory,

15 German Primate Center – Leibniz-Institute for Primate Research, Goettingen, Germany

16 Tel: +49 551 3851-342, E-Mail: mberger@dpz.eu

17

## 18 **Abstract**

19 System neuroscience of motor cognition regarding the space beyond immediate reach mandates free,  
20 yet experimentally controlled movements. We present an experimental environment (Reach Cage)  
21 and a versatile visuo-haptic interaction system (*MaCaQuE*) for investigating goal-directed whole-body  
22 movements of unrestrained monkeys. Two rhesus monkeys conducted instructed walk-and-reach  
23 movements towards targets flexibly positioned in the cage. We tracked 3D multi-joint arm and head  
24 movements using markerless motion capture. Movements show small trial-to-trial variability despite  
25 being unrestrained. We wirelessly recorded 192 broad-band neural signals from three cortical  
26 sensorimotor areas simultaneously. Single unit activity is selective for different reach and walk-and-  
27 reach movements. Walk-and-reach targets could be decoded from premotor and parietal but not  
28 motor cortical activity during movement planning. The Reach Cage allows systems-level sensorimotor  
29 neuroscience studies with full-body movements in a configurable 3D spatial setting with unrestrained  
30 monkeys. We conclude that the primate frontoparietal network encodes reach goals beyond  
31 immediate reach during movement planning.

32

## 33 Introduction

34 Cognitive sensorimotor neuroscience investigates how the brain processes sensory information,  
35 develops an action plan and ultimately performs a corresponding action. Experimental setups with  
36 non-human primates typically make use of physical restraint, such as a primate chair, to control for  
37 spatial parameters like head position, gaze direction, and body and arm posture. This approach led to  
38 numerous important insights into neural correlates of visually guided hand and arm movements.  
39 Especially the frontoparietal reach network, including posterior parietal cortex, premotor cortex and  
40 motor cortex, was studied in terms of force encoding (Cheney and Fetz 1980), direction encoding  
41 (Georgopoulos et al. 1986), spatial reference frames of reach goal encoding (Batista et al. 1999; Buneo  
42 et al. 2002; Kuang et al. 2016; Pesaran et al. 2006), context integration (Gail and Andersen 2006;  
43 Martínez-Vázquez and Gail 2018; Niebergall et al. 2011; Westendorff et al. 2010), obstacle avoidance  
44 (Kaufman et al. 2013; Mulliken et al. 2008), bimanual coordination (Donchin et al. 1998; Mooshagian  
45 et al. 2018), eye-hand coordination (Hwang et al. 2012; Mooshagian and Snyder 2018; Sayegh et al.  
46 2017; Wong et al. 2016), and decision making (Christopoulos et al. 2015; Cisek 2012; Klaes et al. 2011;  
47 Suriya-Arunroj and Gail 2019). Because of the physical restraint, the scope of previous studies was  
48 mostly limited to hand or arm movements, and those were restricted to the immediately reachable  
49 space. Well-controlled planning and execution of spatially and temporally structured goal-directed  
50 movements in larger workspaces, including reach goals beyond immediate reach, could not be  
51 investigated in monkeys.

52 Neuropsychological and neurophysiological evidence suggest that frontoparietal areas encode the  
53 space near the body differently than the space far from the body (see Farnè et al. 2016 for review).  
54 Visuospatial neglect can be restricted to the near or far space as shown by patients with large-scale  
55 lesions comprising also parietal cortex (Halligan and Marshall 1991; Vuilleumier et al. 1998) and  
56 transcranial magnetic stimulation over the parietal cortex (Bjoertomt et al. 2002). Bimodal neurons in  
57 premotor cortex and the posterior parietal cortex of non-human primates respond to visual and  
58 somatosensory stimulation with visual receptive fields being congruent with somatosensory receptive  
59 fields and thereby covering the space near the body (Colby and Goldberg 1999; Graziano et al. 1997;  
60 Rizzolatti et al. 1981, 1997). In addition, mirror neurons in the ventral premotor cortex can respond  
61 differently to an observed reach if the reach goal is within its own reach or not. (Bonini et al. 2014;  
62 Caggiano et al. 2009). These findings indicate that encoding of bimodal sensory information and  
63 information about observed actions seems to be dependent on one's own body boundaries.  
64 Moreover, those findings suggest that premotor and parietal cortex are affected by this distinction.  
65 The frontoparietal network encodes motor goals within immediate reach, but it is unclear if this also  
66 holds true for motor goals beyond immediate reach. Due to the physical restraint of conventional  
67 setups, it has not been possible to investigate naturalistic goal-directed movements that require the  
68 monkey to walk towards targets at variable positions and, thus, to investigate how monkeys plan to  
69 acquire a reach goal beyond the immediately reachable space.

70 In conventional experiments, tethered connections prohibit recording from freely moving primates,  
71 at least in the case of larger species such as macaques. Tethered recordings in freely moving smaller  
72 primate species, such as squirrel monkeys (Ludvig et al. 2004) or marmosets (Courellis et al. 2019;  
73 Nummela et al. 2017) have been demonstrated. One study showed tethered recordings also in  
74 Japanese macaques, however in an environment with no obstacles and with low channel count  
75 (Hazama and Tamura 2019). Using wireless recording technology in combination with chronically

76 implanted arrays, recent studies achieved recordings of single unit activity in nonhuman primates  
77 investigating vocalization (Hage and Jurgens 2006; Roy and Wang 2012), simple uninstructed behavior  
78 (Schwarz et al. 2014; Talakoub et al. 2019), treadmill locomotion (Capogrosso et al. 2016; Foster et al.  
79 2014; Schwarz et al. 2014; Yin et al. 2014), chair-seated translocation (Rajangam et al. 2016), sleep  
80 (Yin et al. 2014; Zhou et al. 2019), and simple movements to a food source (Capogrosso et al. 2016;  
81 Chestek et al. 2009; Fernandez-Leon et al. 2015; Hazama and Tamura 2019; Schwarz et al. 2014;  
82 Shahidi et al. 2019). An alternative to wireless transmission can be data logging for which the data is  
83 stored separately from behavioral data on the headstage (Zanos et al. 2011). This led to investigations  
84 of simple uninstructed behavior and sleep (Jackson et al. 2006, 2007; Xu et al. 2019). However, none  
85 of the experiments with neural recordings in unrestrained monkeys presented an experimental  
86 environment that instructs temporally and spatially precise movement behavior (Supplementary file  
87 1). To study goal-directed motor planning and spatial encoding of motor goals, we developed the  
88 Reach Cage in which we can instruct precise movement start times and multiple distributed  
89 movement goals independent from the food source.

90 Here, we present an experimental environment, the Reach Cage, which is equipped with a visuo-haptic  
91 interaction system (*MaCaQuE*) and allows investigating movement planning and goal-directed  
92 movements of unrestrained rhesus monkeys while recording and analyzing in real-time cortical single-  
93 unit activity. We trained monkeys to perform controlled memory-guided reach movements with  
94 instructed delay to targets within and beyond the immediately reachable space. Using markerless  
95 video-based motion capture, we measured 3-dimensional head, shoulder, elbow and wrist  
96 trajectories. We used wireless recording technology to extract single unit activity in real-time from  
97 three cortical areas (parietal reach region PRR, dorsal premotor cortex PMd, and primary motor cortex  
98 M1) at a bandwidth suitable for BMI applications. We show that the Reach Cage is suitable for  
99 sensorimotor neuroscience with physically unrestrained rhesus monkeys providing a richer set of  
100 motor tasks, including walk-and-reach movements. With the Reach Cage we were able to study motor  
101 goal encoding beyond the immediate reach and during ongoing walking movements. We show that  
102 PRR and PMd but not M1 contain target location information of far-located walk-and-reach targets  
103 already during the planning period before and during the walk-and-reach movement.

104

## 105 **Results**

106 We developed the Reach Cage to expand studies of visual guided reaching movements to larger  
107 workspaces and study movements of rhesus monkeys performing structured whole-body movement  
108 tasks while being physically unrestrained. We report on quantitative assessment of the animals'  
109 behavior in the Reach Cage, and neuroscientific analysis of walk-and-reach goal encoding. The timing  
110 of the monkeys' reaching behavior can be precisely controlled and measured with the touch and  
111 release times of our touch-sensitive cage-mounted targets (1<sup>st</sup> section). Additionally, multi-joint 3-  
112 dimensional reach kinematics can be measured directly with the video-based motion capture system  
113 (2<sup>nd</sup> section). We will show that high channel count wireless neural recording is possible in the Reach  
114 Cage and report on single-unit activity during such structured task performance (3<sup>rd</sup> section). Finally,  
115 we demonstrate the suitability of the Reach Cage for studying motor goal encoding beyond the  
116 immediate reach and show that premotor and parietal cortical activity contain information about far-  
117 located walk-and-reach targets position during movement planning (4<sup>th</sup> section).

118

119 *Real-time control of instructed behavior in physical unrestrained rhesus monkeys in the Reach Cage*

120 The core element of our newly developed Reach Cage (Figure 1) is the *Macaque Cage Query Extension*  
121 (*MaCaQuE*). Using this interaction device, we were able to train two fully unrestrained rhesus monkeys  
122 to conduct spatially and temporally well-structured memory-guided reaches, a behavioral task  
123 common to sensorimotor neuroscience in primates. Here we report the technical details of *MaCaQuE*  
124 and its use with physically unrestrained rhesus monkeys, however, we also used *MaCaQuE*  
125 successfully in a study with human participants (Berger et al. 2019).

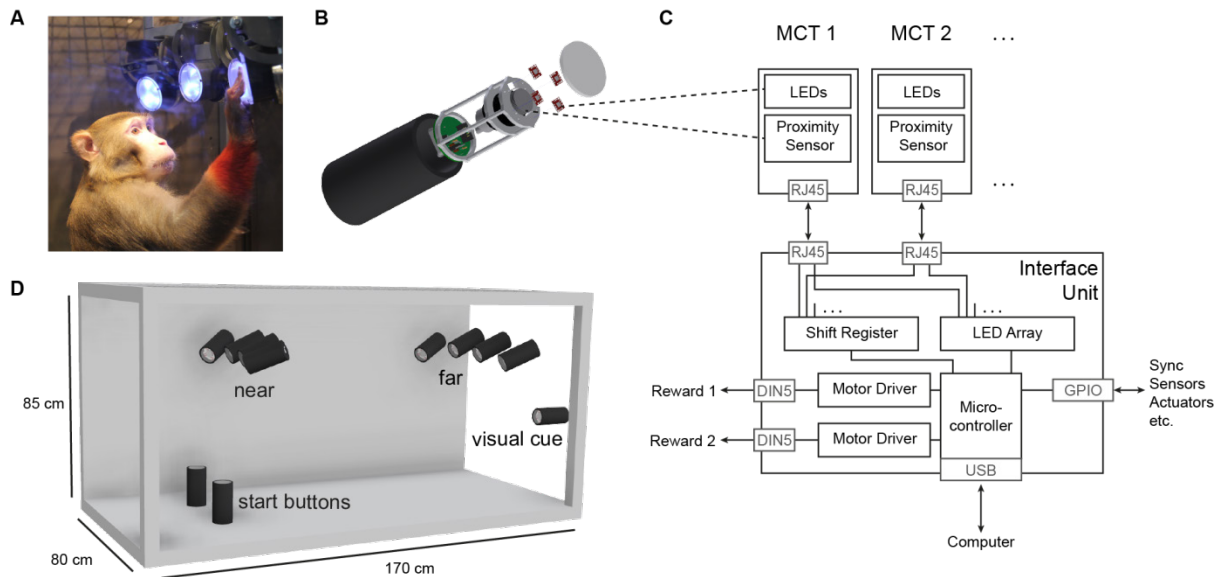

126

127 **Figure 1: The Reach Cage setup.** A) Monkey K performing a reach task on the *Macaque Cage Query Extension* (*MaCaQuE*),  
128 touching one of the illuminated *MaCaQuE* Cue and Target boxes (*MCTs*) inside the Reach Cage. B) An *MCT* contains a  
129 proximity sensor to make the translucent front cover touch-sensitive and four RGB LEDs to color-illuminate it. C) Schematic  
130 drawing of *MaCaQuE* showing the electronic components with the microcontroller interfacing between *MCTs* and an  
131 external computer for experimental control. D) Sketch of the Reach Cage with ten *MCTs* inside, two on the floor pointing  
132 upwards serving as a starting position for the monkey and two rows of four (near and far) pointing towards the starting  
133 position. The far *MCTs* were positioned to the back of the cage such that the animals needed to walk first. An eleventh *MCT*  
134 is positioned outside the cage for providing additional visual cues. The universal *MCTs* can be arranged flexibly to serve  
135 different purposes.

136 Both animals learned within a single first session that touching a target presented on a *MaCaQuE* Cue  
137 and Target box (*MCT*, Figure 1B) leads to a liquid reward. Due to the computer-controlled precise  
138 timing and dosage of reward (Figure 1C), we could employ *MaCaQuE* for positive reinforcement  
139 training (PRT) to teach both animals a memory-guided target acquisition task with instructed delay  
140 (see Materials and Methods). Unlike chair-based setups, *MaCaQuE* allows for target placement  
141 beyond the immediate reach of the monkeys (Figure 1D). Monkey K performed the final version of the  
142 walk-and-reach task (Figure 2A/B) with 77% correct trials on average (s.d. 9%, 19 sessions) with up to  
143 412 correct trials per session (mean 208, s.d. 93). The sessions lasted on average 40 min (s.d. 15 min).  
144 Monkey L performed the final version of the task with 55% correct trials on average (s.d. 5%, 10  
145 sessions) with up to 326 correct trials per session (mean 219, s.d. 55). Sessions lasted on average 65  
146 min (s.d. 15 min). The majority of errors were due to premature release of the start buttons prior to  
147 the go cue. Trials with properly timed movement initiation were 92% correct in monkey K and 78%  
148 correct in monkey L.

149  
150

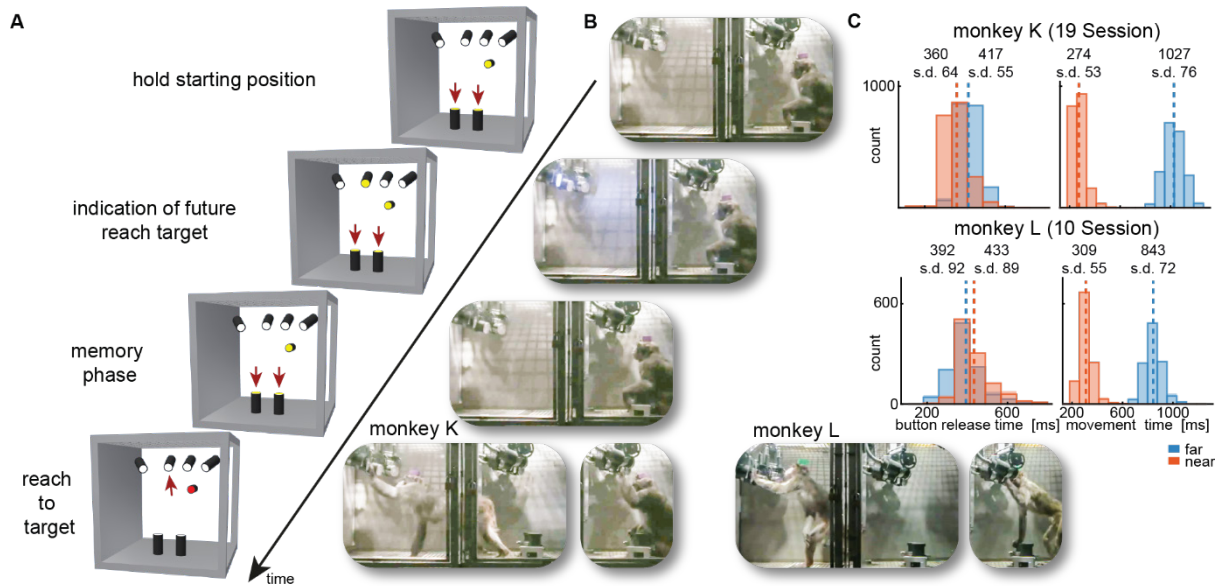

151

152 **Figure 2: Walk-and-reach task.** A) Timeline of the walk-and-reach task. Yellow *MCT*s indicate illumination. Only near targets  
 153 are shown to illustrate this example trial. The second left-most near target was indicated as target and had to be reached  
 154 after an instructed memory period in response to the go cue (isoluminant color change on the *MCT* outside the cage). B) An  
 155 example trial to a far target for monkey K (left) and monkey L (right). The frames of the video correspond to the time periods  
 156 of the trial illustrated in A. C) Times between go cue and start button release (button release time), and between start button  
 157 release and target acquisition (movement time) were distributed narrowly in most cases for reaching movements to near  
 158 (red) and far (blue) targets demonstrating the temporally well-structured behavior. Dashed vertical lines indicate averages  
 159 and corresponding numbers indicate averages and standard deviations (s.d.) in ms.

160 While the animals were not physically restricted to a specific posture, the strict timing of the task  
 161 encouraged them to optimize their behavior. Since the *MaCaQuE* system makes information about  
 162 *MCT* touches and releases available with minimal delay (< 20 ms), it is possible to enforce an exact  
 163 timing of the movements when solving a reaching task in the Reach Cage. Figure 2C shows the  
 164 distribution of button release times and movement times towards near and far targets for the task  
 165 (monkey K/L: 19/10 sessions, 3956/2194 correct trials). Since a whole-body translocation is required  
 166 to approach far targets, movement times were longer than for near targets in both monkeys and tasks  
 167 (t-test,  $p < 0.001$ ). Movement time distributions were narrow (s.d.  $\leq 76$  ms) indicating that the  
 168 monkeys optimized their behavior for consistent target acquisition. Button release time indicates the  
 169 onset of the hand movement, not necessarily the whole-body movement. In monkey K, the button  
 170 release times were higher for far compared to near targets (t-test,  $p < 0.001$ ). In contrast, button  
 171 release times in monkey L were lower for far compared to near targets ( $p < 0.001$ ), reflecting a  
 172 different behavioral strategy for movement onset (monkey K was sitting during the delay period while  
 173 monkey L was standing).

174 The behavioral results as directly measured with *MaCaQuE* via the proximity sensors of the *MCT*s  
 175 demonstrate that the Reach Cage is suitable to train animals on goal-directed reaching tasks with  
 176 target positions not being constrained by the immediately reachable space of the animal. The  
 177 temporally well-structured task performance at the same time allows behavioral and  
 178 neurophysiological analyses as applied in more conventional settings.



179

180 *Time-continuous 3-dimensional arm kinematics during walk-and-reach behavior*

181 Since we do not impose physical restraint, the monkeys have more freedom to move than in  
182 conventional setups. This allows for testing new behavioral paradigms such as the walk-and-reach task  
183 but also provides more freedom in how to solve the task. We used video-based motion capture to  
184 analyze kinematics and their variability.

185 We measured the 3-dimensional posture of the reaching arm during the reach and walk-and-reach  
186 behavior of 2/3 sessions with a total of 469/872 successful trials in monkey K/L. Specifically, we  
187 tracked the monkeys' headcap, left shoulder, elbow and wrist. Figure 3A shows the side-view of the  
188 body part positions for each trial and video frame between 100 ms before button release and 100 ms  
189 after target acquisition for the reach (red) and walk-and-reach (blue) movements to the mid-left  
190 target.

191

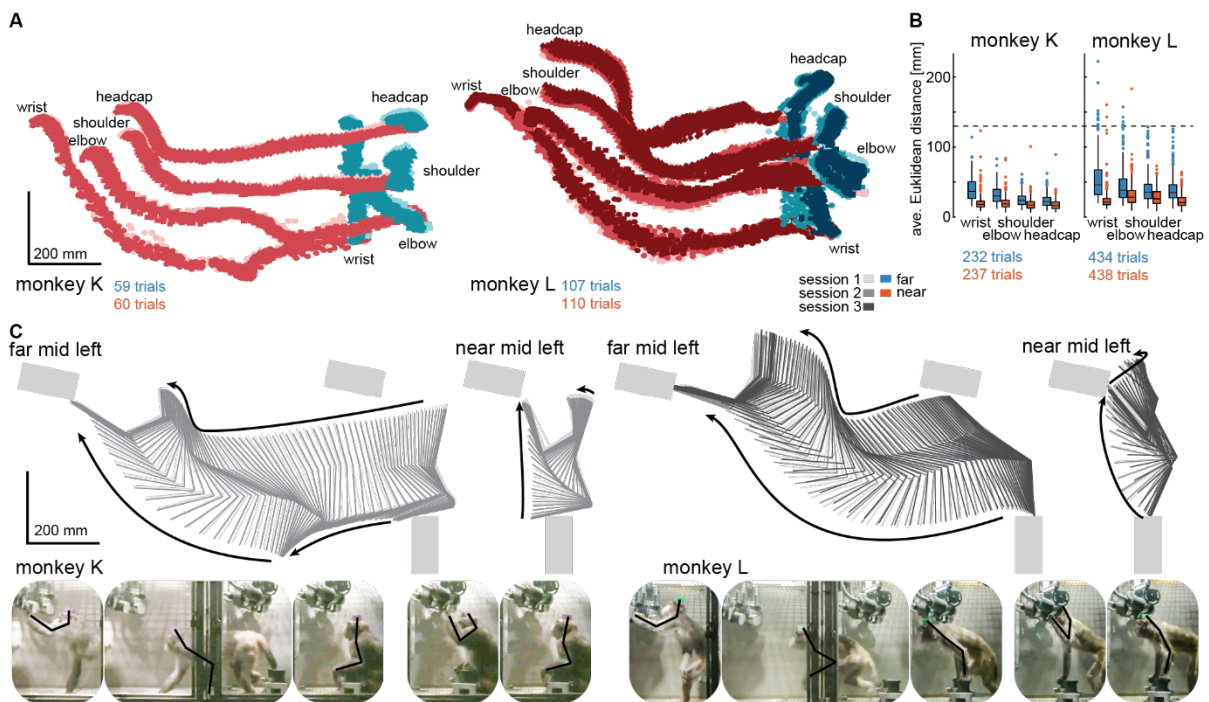

192

193 **Figure 3: Structured behavior during task performance in unrestrained animals.** A) Motion tracking of the left wrist, elbow,  
194 shoulder and the headcap implant during reach and walk-and-reach movements for monkey K (left) and L (right). Video-  
195 based markers are tracked in three dimensions and projected to a side-view. Trial-by-trial marker positions for the reach  
196 (red) and walk-and-reach (blue) movements to the mid left targets are shown for a sampling frequency of 60 Hz, overlaid for  
197 multiple sessions (light-dark colors). B) Small trial-to-trial variability of movement trajectories, even across sessions,  
198 demonstrates spatially well-structured and consistent behavior. For each trial and marker, the average Euclidean distance  
199 to the trial averaged trajectory at corresponding times is shown (see Materials and Methods). For reference, neighboring  
200 near targets were mounted at approximately 130 mm distance (dashed line) in this experiment. The MCT diameter is 75 mm.  
201 C) Reconstructed 3-dimensional arm posture as function of time during reach and walk-and-reach movements based on the  
202 video motion capture separately for each monkey and session. The lines connect the marker (wrist to elbow to shoulder to  
203 headcap) for each marker position averaged across trials. Grey rectangles show target and start button MCTs. Pictures below  
204 show snapshots of characteristic postures during an example reach and walk-and-reach trial.

205

206 Within each animal, reach kinematics were highly consistent from trial to trial and from session to  
207 session. To quantify the variability in arm posture, we calculated for each target and marker separately  
208 and at corresponding times the Euclidean distance between the single-trial trajectories and the across  
209 sessions trial-averaged trajectory. Figure 3B shows the distributions of Euclidean distance averaged  
210 over time for each trial, marker and monkey. The highest variability had the wrist during walk-and-  
211 reach movements with a median of 37/46 mm and 0.75-quartile of 50/67 mm for monkey K and L  
212 respectively. Within a session these median deviations are 1-6 mm smaller. As a reference, the  
213 transparent front plate of the targets has a diameter of 75 mm. The center-to-center distance between  
214 neighboring targets is around 130 mm (near; shown as dashed line in the plot) and 210 mm (far). This  
215 shows that even across sessions, the arm posture during the movements towards the same target at  
216 a given time varied only by a few centimeter.

217 The movement patterns between monkey K (left) and monkey L (right) were different. Figure 3C shows  
218 the trial averaged arm posture for each time point during the reach and walk-and-reach movements.  
219 Monkey K was sitting during the memory period and then used its left forelimb for walking and  
220 reaching. Monkey L was standing during the memory period and walked bipedally to the far targets.  
221 Both animals used this strategy consistently in all trials.

222 The kinematic analyses demonstrate that the animals not only complied with the spatial and temporal  
223 task requirements in terms of starting and endpoint acquisition but also adopted reliable repetitive  
224 behavior in terms of overall reach kinematics despite the lack of physical restraint. The animals used  
225 different behavioral strategies. However, the video-based motion capture allowed us to quantify the  
226 arm and head kinematics.

227

### 228 *Multi-channel single unit activity can be recorded in the Reach Cage using wireless technology*

229 The Reach Cage provides an adequate setting for studying well-isolated single neuron activity from  
230 multiple areas of the cerebral cortex of monkeys during movement planning and execution of goal-  
231 directed behavior in minimally constrained settings. We here provide simultaneous recordings from  
232 three different sensorimotor areas, including non-surface areas inside sulci, during the goal-directed  
233 memory-guided walk-and-reach task.

234 We chronically implanted a total of 192 electrodes in primary motor cortex (M1), dorsal premotor  
235 cortex (PMd) and the parietal reach region (PRR) in the posterior parietal cortex of both monkeys using  
236 six 32-channel floating microwire arrays (FMA) with various lengths (see Materials and Methods). We  
237 recorded broadband (30 ksp/s per channel) neural data from all arrays simultaneously (i.e. up to 192  
238 channels) while the monkeys performed the walk-and-reach task (Figure 4). The animals moved  
239 through the cage wearing the wireless electronics and protective cap without banging the implant to  
240 the cage equipment and performed the behavioral task as without the wireless gear.

241

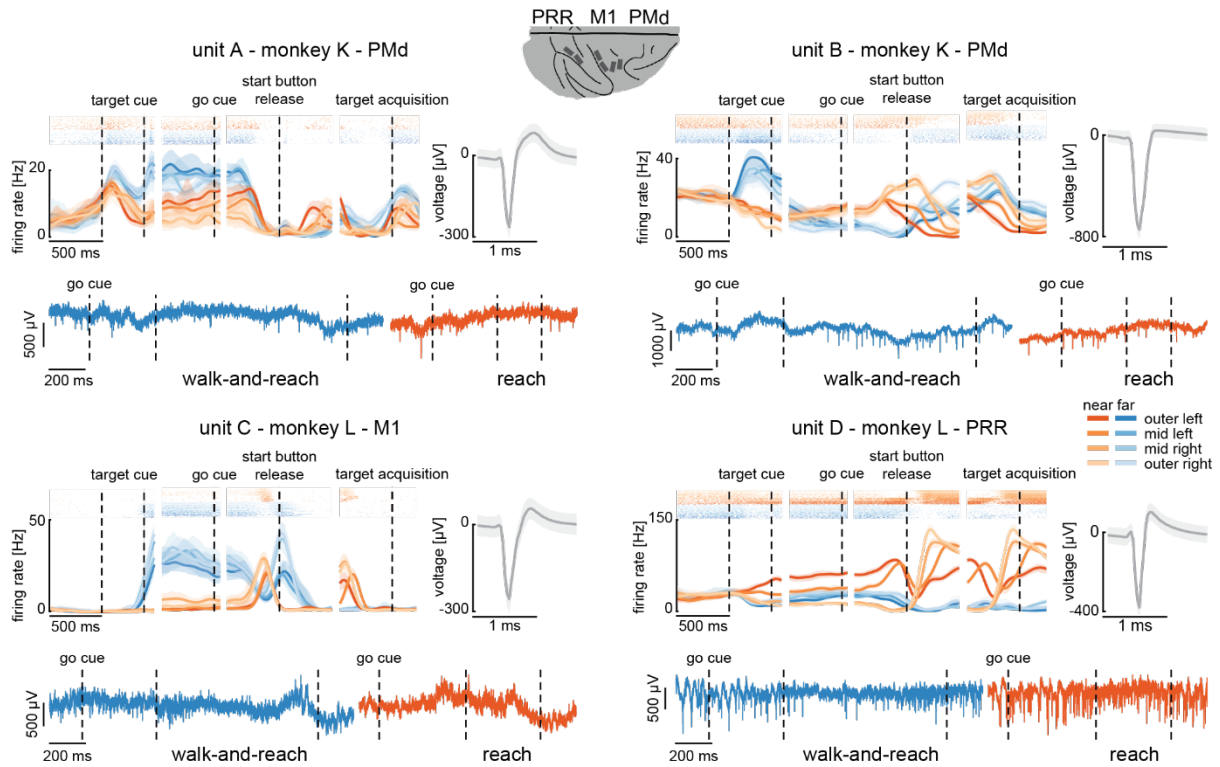

242

243 **Figure 4: Wireless recording in the Reach Cage.** Four example units from the frontoparietal reach network of monkeys K and  
 244 L recorded wirelessly while the monkeys performed the memory-guided walk-and-reach task. The figure shows for each unit  
 245 averaged spike densities with corresponding raster plots (top left), the waveform (top right) and the unfiltered broadband  
 246 signal during a reach and walk-and-reach example movements. Vertical dashed lines indicate task events in order of  
 247 appearance: target cue (on and off), go cue, start button release and target acquisition. Error bars indicate bootstrapped  
 248 95% confidence interval for the spike densities and s.d. for the waveform. Color indicates near (red) and far (blue)  
 249 targets, lightness level indicates right (light) to left (dark) target positions.

250 We recorded in monkey K/L 2/10 sessions from all six arrays simultaneously using two 96-channel  
 251 wireless headstages. Our custom designed implants can house both headstages and protect them and  
 252 the array connectors against dirt and physical impact. The implants are designed to be used with  
 253 different commercially available wireless systems, with the 2x 96-channel digital systems presented  
 254 here or with a 31- or 127-channel analog wireless system, dependent on the need of the experiment.  
 255 Implant development and methodological details will be discussed below (Material and Methods).

256 The wireless signal transmission was stable during walking movements. To quantify the stability, we  
 257 calculated the rate of data loss due to lost connection to the wireless system. We checked for each  
 258 time point if either of the two headstages did not receive data. As conservative measure, we only  
 259 considered correctly performed trials, since in these trials it is guaranteed that the animal moved the  
 260 full stretch from start to goal. The best sessions showed loss rates of 3.18%/1.03% of all time bins for  
 261 monkey K/L, and the worst sessions of 6.59%/6.34%, respectively. On average across sessions and  
 262 monkeys, the loss rate was 3.32% (s.d. 1.7%). Data loss was spread over all targets with a slight spatial  
 263 bias (Figure 4 – figure supplement 1A and source data 1, 2-way ANOVA position  $F(3, 2657) = 3.48$ ,  $p =$   
 264  $0.015$ ; position x distance  $F(3, 2657) = 4.81$ ,  $p = 0.002$ ). The spatial bias was introduced by trials with  
 265 high data loss rates. When removing trials with a loss rate of above 5% there was no significant spatial  
 266 bias anymore (Figure 4 – figure supplement 1B and source data 2, 2-way ANOVA position  $F(3, 2657) =$   
 267  $0.88$ ,  $p=0.45$ ; position x distance  $F(3, 2657) = 2.36$ ,  $p=0.07$ ). From here on, we only consider correct  
 268 trials with a loss rate of less than 5%. Note, walk-and-reach trials showed different loss rates than



269 reach trials ( $F(3, 2657) = 279.96, p < 0.001$ ), however, this does not influence further results that focus  
270 on movement direction of reach or walk-and-reach movements separately.

271 The wireless signal quality was stable during walking movements and allowed us to isolate single- and  
272 multi-unit activity during the walk-and-reach task. Figure 4 shows four example neurons from the  
273 frontoparietal reach network of both monkeys while performing the task. Trial-averaged spike  
274 densities (top left) show that units were modulated by task condition. All four example neurons are  
275 significantly modulated by target distance, left-to-right target position, time during the trial, and  
276 interactions of distance  $\times$  position and distance  $\times$  time (ANOVA  $p < 0.05$ ). Units A and C are mostly  
277 active during the memory period while units B and D are active during memory period and movement.  
278 Waveforms of the isolated example neurons are shown on the top right of each panel. Unfiltered  
279 broadband data of one near (red) and one far (blue) example trial are shown below. Spiking activity  
280 can be identified in the broadband signal also during the reach and walk-and-reach movement. Of all  
281 twelve recorded sessions three sessions revealed task responsive activity on all 192 channels, i.e.  
282 showed at least one effect in distance, position, time or one of the interactions; across all sessions the  
283 mean number of task-responsive channels was 189 (s.d. 5 channels). Up to 179 channels were position  
284 responsive, i.e. showing at least one effect in position or one of the interactions (mean: 162, s.d. 17  
285 channels).

286 In summary, the Reach Cage proved to be suitable for addressing neuroscientific question based on  
287 single and multi-unit recordings. Broadband wireless neural signals showed excellent spike isolation  
288 and modulation of spike frequency correlated with behavioral events.

289

#### 290 *Premotor and parietal cortex encode movement goals beyond immediate reach*

291 The Reach Cage allows us for the first time to test the spatial encoding of movement goals at larger  
292 distances to the animal. We wanted to know whether the frontoparietal reach network encodes motor  
293 goals only within the immediate reach or also beyond. For this, we computed separately in near and  
294 far trials the performance for decoding goal direction (left vs. right) with a support vector machine  
295 (SVM) decoder based on multi-unit firing rates.

296 We analyzed the session with the highest number of trials for each animal to avoid biasing our results  
297 by reusing repeated measures of the same neurons on channels which showed stable signals across  
298 multiple sessions. Figure 5A shows the movement paths of the wrist (top) and head (bottom) of the  
299 animals for the reach (orange) and walk-and-reach (blue) behavior towards the different targets.  
300 Figure 5B shows 20-fold cross validation of decoding accuracy in 300 ms time windows at 100 ms time  
301 steps. To test if there is reach goal encoding during movement planning prior to onset of movement,  
302 we analyzed the time window during the memory period starting 100 ms after target cue offset. To  
303 test if there is reach goal encoding during reaching (near) and during ongoing walking-and-reaching  
304 (far), we analyzed the 300 ms immediately before target acquisition. We compared decoding accuracy  
305 of both time windows against a baseline time window ending 100 ms before cue onset. In PMd and  
306 PRR decoding is significant for both memory and movement period for reach and walk-and-reach  
307 movements (Figure 5 – source data 1). In M1 decoding accuracy did not reach significance for walk-  
308 and-reach movements.

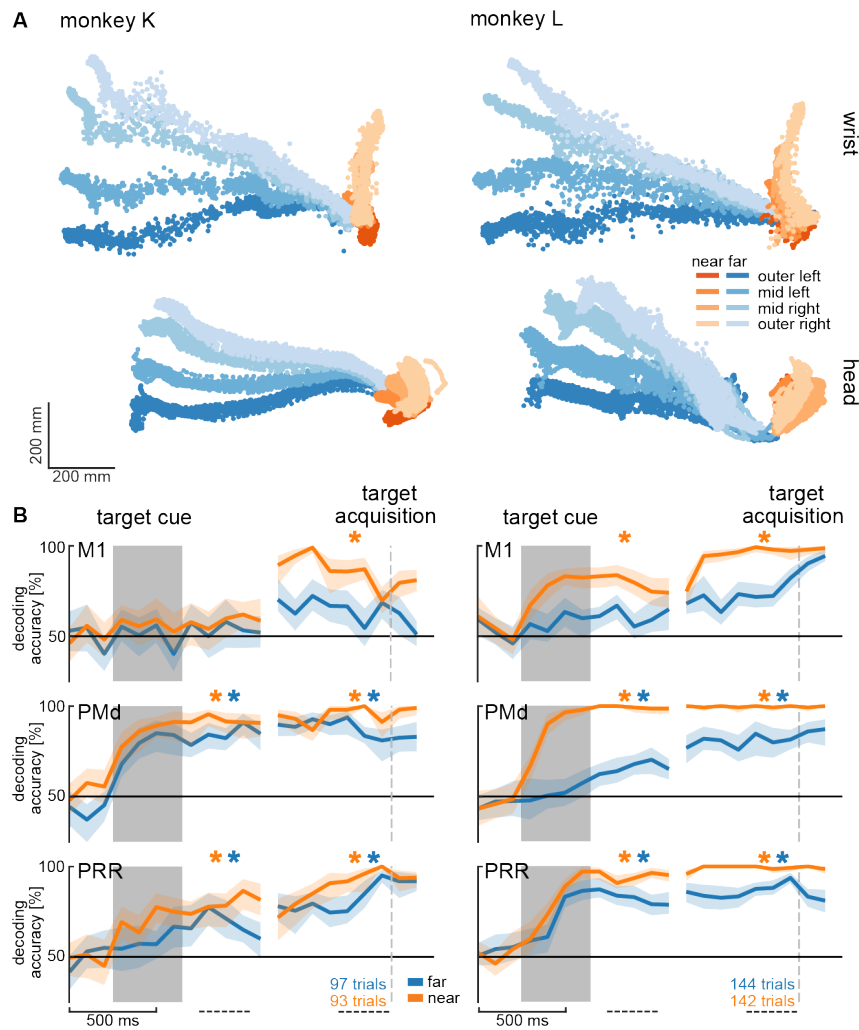

309

310 **Figure 5: Direction decoding in the walk-and-reach task.** A) Wrist (top) and head (bottom) position during reach (orange)  
 311 and walk-and-reach (blue) movements towards the eight targets projected to the top-view. Each point corresponds to one  
 312 location in one trial sampled at 60 Hz. B) Decoding accuracy of 20-fold cross validation of a linear SVM decoder in 300 ms  
 313 bins at 100 ms time steps. We decoded if a trial was towards one of the two left or one of the two right targets. Premotor  
 314 and parietal cortex but not motor cortex showed a significant decoding walk-and-reach targets even during the memory  
 315 period. Statistical testing was done on one bin in the memory period 100 – 400 ms after the cue and movement period  
 316 300 – 0 ms before target acquisition (dashed line). Test was a paired t-test against the first bin 400 – 100 ms before cue. An  
 317 asterisk corresponds to a significant increase with Bonferroni correction.

318

319 From the horizontal fanning out of the unconstrained movement patterns (Figure 5A) it became  
 320 evident that both animals directed their walking movement towards the goal from early on in the  
 321 movement. To confirm that the motor goal information decodable from PMd and PRR correlates  
 322 with the reach goal location rather than initial walking movement direction, we introduced a  
 323 passage in the middle of the walk-and-reach path (a transparent divider between near and far  
 324 targets with a narrow opening cut out). While movement trajectories for the different motor goal  
 325 locations collapsed onto very similar initial walking directions due to the passage (Figure 5 – figure  
 326 supplement 1A), the decoding accuracy was not affected by this measure, i.e. was independent of  
 327 the movement path (Figure 5 – figure supplement 1B and source data 2).

328 Taken together, the Reach Cage environment allows us to study sensorimotor neuroscience question  
 329 within an unrestrained spatial setting. Here, we show that we can decoded target location information

330 from neural activity in premotor and parietal cortex of far-located targets beyond the immediate  
331 reach.

332

## 333 Discussion

334 We introduced the Reach Cage as novel experimental environment for sensorimotor neuroscience  
335 with physically unrestrained rhesus monkeys. As core interactive element, we developed *MaCaQuE*,  
336 a new experimental control system for sensorimotor tasks in cage environments. We trained two  
337 monkeys to conduct spatially and temporally structured memory-guided reach tasks that required  
338 them to reach to targets near or far from them with a walk-and-reach movement. With *MaCaQuE*, we  
339 could measure button release and movement times in response to visual cues with the same if not  
340 higher temporal precision as in touch screen experiments. Using markerless video-based motion  
341 capture, we could track 3-dimensional head and multi-joint arm kinematics for reach and walk-and-  
342 reach movements and correlate them with the synchronously recorded neural data. Trajectories had  
343 low spatial variability over trials showing that monkeys perform instructed movement consistently  
344 even when no physical restraint is applied. Variations in movement pattern between task conditions  
345 or monkeys could well be quantified in detail with this motion capture approach. In parallel, we  
346 wirelessly recorded broadband neural signals of 192 channels from three brain areas (M1, PMd, and  
347 PRR) simultaneously, an approach suitable for BMI applications. Isolated single-neuron activities were  
348 clearly modulated by the task events and encoded information about the location of immediate reach  
349 targets and also of remote walk-and-reach targets. Moreover, we could decode walk-and-reach target  
350 location information from premotor and parietal cortex, but not motor cortex, during movement and  
351 even during the memory period before the movement. This suggests that premotor and parietal  
352 cortex encodes motor goals beyond immediate reach. With our Reach Cage approach, we provide an  
353 experimental environment that allows testing fully unrestrained monkey on spatially and temporally  
354 controlled behavior. With wireless intra-cortical recordings and markerless motion capture  
355 experimental spatial configurations are possible that are not restricted to the vicinity of the animals  
356 but allow studying complex full-body movement patterns.

### 357 *Far-space motor goal encoding in the frontoparietal reach network*

358 We showed that during the memory period of the walk-and-reach task we can decode target location  
359 information of near-located reach and far-located walk-and-reach trials from PRR and PMd. Reducing  
360 the initial walk-and-reach movement path to a minimum variability between the different target  
361 directions by introducing a passage did not change decoding accuracy. This indicates that PRR and  
362 PMd do not encode variation in the initial movement pattern but rather spatial information about the  
363 reach goal beyond the immediate reach.

364 PMd (e.g. Crammond and Kalaska 1994) and PRR (e.g. Snyder et al. 1998) activity are known to encode  
365 reach related spatial information during planning of reaches within immediate reach. We now show  
366 that this is also true beyond reach when walking behavior is needed to approach the reach target.  
367 Monkey K even used its reaching arm for walking by making ground contact, while monkey L was  
368 swinging his reaching arm during the locomotion without putting it down. This result might seem  
369 surprising in view of 1) neuropsychological studies showing that a near space specific neglect can arise  
370 from parietal lesions (Halligan and Marshall 1991; Vuilleumier et al. 1998) or parietal transcranial

371 stimulation (Bjoertomt et al. 2002) and 2) the existence of bimodal neurons in premotor and posterior  
372 parietal cortex that have visual receptive fields centered on body surface and only covering its vicinity  
373 (Colby and Goldberg 1999; Graziano et al. 1997; Rizzolatti et al. 1981, 1997). Yet, none of these studies  
374 explicitly show nor disregard PMd or PRR being involved in far space encoding. It could be, for  
375 example, that such a near or far space specificity is located in separate parts of premotor or parietal  
376 cortex. However, we propose an alternative explanation. The extent of the near space, often called  
377 peripersonal space (Rizzolatti et al. 1997), is variable. Neurophysiological and neuropsychological  
378 studies have shown that it can expand around tools (Berti and Frassinetti 2000; Giglia et al. 2015;  
379 Holmes 2012; Iriki et al. 1996; Maravita et al. 2002; Maravita and Iriki 2004) or fake arms (Blanke et  
380 al. 2015; Botvinick and Cohen 1998; Graziano et al. 2000; Maravita et al. 2003; Pavani et al. 2000).  
381 There is evidence from human psychophysics that the peripersonal space, here defined by the spatial  
382 extent of visuo-tactile integration, expands towards reach goals (Brozzoli et al. 2009, 2010).  
383 Correspondingly, we could show that peripersonal space, as defined by the occurrence of visuo-tactile  
384 integration, in human participants expands to reach goals beyond immediate reach when subjects  
385 performed a walk-and-reach task similar to here (Berger et al. 2019). While previous research  
386 suggested selective encoding of near space in parts of parietal and premotor cortex, goal directed  
387 behavior might lead to an expansion of so-called near space even beyond immediate reach. Far-  
388 located walk-and-reach goals hence might effectively be within the “near space” and be encoded  
389 similar to near-located reach goals in parietal and premotor regions known for reach goal selectivity  
390 during planning and movement.

391

### 392 *Neuroscience of goal-directed behavior in unrestrained non-human primates*

393 As the example of far-space encoding above demonstrates, our understanding of motor cognition and  
394 spatial cognition in the primate brain might underestimate the true complexity of cortical  
395 representations since experimental needs previously prevented the study of more involved goal-  
396 directed full-body movements. While the limitations imposed by tethered recording techniques have  
397 been overcome with wireless technologies or data-logging in several neurophysiological studies with  
398 unrestrained non-human primates by now, the investigation of sensorimotor behavior so far mostly  
399 focused on locomotion behavior, like treadmill or corridor walking, or immediate collection of food  
400 items with the forelimb (see Supplementary file 1 for an overview). In none of these previous studies,  
401 precisely timed and spatially well-structured goal-directed behavior, or even movement planning, was  
402 investigated in unrestrained monkeys. If behavior was “instructed”, it was always a direct movement  
403 towards a food source. Our Reach Cage made it possible to have multiple movement targets dislocated  
404 from the food source and placed at variable locations within the cage. Also it allowed to provide strict  
405 temporal instructions to the animals when to start or until when to finish a movement.

406 With the Reach Cage we aimed for an experimental setting which allows us to study spatial cognitive  
407 and full-body sensorimotor behavior with levels of experimental control and behavioral analysis  
408 equivalent to conventional chair-seated experiments. We aimed for maximal freedom of the animal  
409 to move and combined this with the conventional approach of a highly trained and structured task  
410 that (1) allows us to control movement timing to introduce certain periods, such as movement  
411 preparation; (2) ensures that the animal focuses on the specific behavior due to the task demand and  
412 (3) provides repetition for a statistical analysis. With this combination, we were able to train the

413 animals to conduct goal-directed memory-guided walk-and-reach movements upon instruction, a  
414 behavior which cannot be studied in chair-based settings or on treadmills.

415 The animals' movement behavior was only constrained by the task and the overall cage volume.  
416 Nonetheless, reach trajectories revealed fast straight movements with little trial-to-trial variability  
417 even across sessions. Apparently, over the course of training, the animals had optimized their  
418 movement behavior and adopted consistent starting postures and stereotyped movement sequences.  
419 We were able to use the interaction device *MaCaQuE* to reveal narrow distributions of hand release  
420 time of the start button as response to the go signal and the movement time from the start button to  
421 the reach target. This spatiotemporal consistency of the behavior over many trials allows analytical  
422 approaches to both the behavioral and the neural data equivalent to conventional settings.

423 *MaCaQuE* can serve as a robust cage-based equivalent to illuminated push-buttons (Batista et al.  
424 1999; Buneo and Andersen 2012) or a touch screen (Klaes et al. 2011; Westendorff et al. 2010) in  
425 conventional experiments, or as an alternative to wall-mounted touch screens in the housing  
426 environment (Berger et al. 2017; Calapai et al. 2017). Yet, the *MaCaQuE* system is more flexible in  
427 terms of spatial configuration. Targets and cues are vandalism-proof and can be placed at any position  
428 in large enclosures, allowing for 3-dimensional arrangements and an arbitrarily large workspace. If  
429 more explorative, less stereotyped behavior is of interest, the trial-repetitive nature of the current  
430 task can easily be replaced by alternative stimulus and reward protocols, e.g. for foraging tasks. Our  
431 reach goal decoding analysis performed on a single trial basis showing that single trial quantification  
432 is possible. This would allow for the analyses of unstructured behavior. In another study, we used  
433 *MaCaQuE* with humans and expanded it to deliver vibro-tactile stimuli to the subjects' fingers and to  
434 receive additional input from push buttons in parallel to the reach target input and output (Berger et  
435 al. 2019). It would be also straightforward to implement continuous interaction devices such as a  
436 joystick or motors to control parts of the cage i.e. doors. Similar to other systems for neuroscience  
437 experimentation and training (Libey and Fetz 2017; Ponce et al. 2016; Teikari et al. 2012), we used  
438 low-cost-of-the-shelf components with an easy-to-program microcontroller platform as a core.

439

#### 440 *Wireless recordings for BMI applications*

441 An important translational goal of sensorimotor neuroscience with non-human primates is the  
442 development of brain-machine interfaces (BMI) based on intracortical extracellular recordings to aid  
443 patients with severe motor impairments. Intracortical signals can be decoded to control external  
444 devices, as demonstrated in non-human primates (Carmena 2013; Hauschild et al. 2012; Musallam et  
445 al. 2004; Santhanam et al. 2006; Serruya et al. 2002; Taylor et al. 2002; Velliste et al. 2008; Wessberg  
446 et al. 2000), and suited to partially restore motor function in quadriplegic human patients (Aflalo et  
447 al. 2015; Bouton et al. 2016; Collinger et al. 2013; Gilja et al. 2015; Hochberg et al. 2012; Wodlinger et  
448 al. 2014). The results from the reach cage allow relevant insight towards BMI applications in two ways.  
449 First, we show encoding of reach goals during other ongoing movement behavior (locomotion). A  
450 previous study showed that when monkeys perform an arm movement task in parallel to a BMI cursor  
451 task based on decoding arm movement related neural activity, the BMI performance decreases  
452 (Orsborn et al. 2014). Little was known before about the stability of forelimb decoding performance  
453 when other body movements are performed in parallel such as walking. For partially movement-  
454 impaired patients, like arm amputees, existence of reach goal signals as demonstrated here, is a



455 prerequisite for restoring the lost function with a prosthesis while still conducting the healthy  
456 movements, e.g. walking. Second, the Reach Cage in its current form with its discrete lights and targets  
457 provides a useful environment for BMI studies that follow a different approach, namely to control  
458 smart devices or a smart home with ambient assisted living environments reacting to discrete sets of  
459 commands. While the user only needs to choose among a discrete set of programs, the smart device  
460 or home would take care of the continuous control of the addressed actuators. The Reach Cage is a  
461 useful tool to develop such a BMI that makes temporally precise and correct decisions which program  
462 to activate. Importantly, the Reach Cage allows to test if and in which brain areas such decisions are  
463 encoded invariant to body position in the room, important also for patients incapable of walking but  
464 using assisting devices like a wheelchair to relocate (Rajangam et al. 2016).

465 We show that our recording bandwidth and quality is sufficiently high for analyzing neural dynamics  
466 based on spiking activity in multiple brain areas simultaneously without trial-averaging. Further, we  
467 show that there is enough information in the population activity to be detected by a decoder on a  
468 single trial basis. This is an important prerequisite for BMI applications, and also for the analysis of  
469 free behavior, for which structured repetitive behavior is neither given nor wanted. To our knowledge,  
470 192 channels is the highest channel count of recording full broadband (30 ksp/s per channel)  
471 intracortical recordings in unrestrained non-human primates. Previous studies presented  
472 simultaneous recordings of 96 channels broadband data; when higher channel counts were used, e.g.  
473 spiking activity from 512 channels (Schwarz et al. 2014), automatic spike detection on the headstage  
474 was applied and only spike times and waveforms were transmitted and recorded. This is sufficient for  
475 spike time analyses but full broadband data would be necessary to extract local field potentials and to  
476 change spike detection post-hoc.

477 An alternative to wireless recordings is data logging which can be used to store the recorded data on  
478 a head-mounted device (Jackson et al. 2006, 2007; Zanos et al. 2011). While the logging device is  
479 detached from any behavioral monitoring or task instruction system, additional measures can be  
480 taken to ensure offline synchronization of behavioral data with the logged neural data. Yet, real-time  
481 spike sorting and data processing for closed-loop BMI applications are limited to the head-mounted  
482 computational capacity when using loggers, which is usually low, while a wireless transmission  
483 provides access to powerful processors outside the animal.

484

### 485 *3-dimensional markerless motion capture in the Reach Cage*

486 In addition to *MaCaQuE* for experimental control, we demonstrated the usefulness of 3-dimensional  
487 video-based multi-joint motion tracking during the walk-and-reach movements. Reliable motion  
488 capture with unrestrained monkeys provides a technical challenge. At least two cameras need to see  
489 a marker or body part to reconstruct a 3-dimensional position. Occlusion by objects or the animal itself  
490 is usually an issue (Chen and Davis 2000; Moeslund et al. 2006). When using systems based on physical  
491 markers (active LEDs or passive reflectors), rhesus monkeys tend to rip off the markers attached to  
492 their body, unless excessively trained. An alternative are fluorescent or reflective markers directly  
493 painted to the skin of the animal (Courtine et al. 2005; Peikon et al. 2009), which also require  
494 continuously repeated shaving, or markers that cannot be removed, such as collars (Ballesta et al.  
495 2014). Video-based marker-free system models were recently reported (Bala et al. 2020; Nakamura  
496 et al. 2016), however, this or similar systems were not yet reported with neurophysiological recordings

497 in monkeys. We used the recently introduced open source toolbox DeepLabCut (Mathis et al. 2018)  
498 which provides markerless tracking of visual features in a video, such as body parts but also objects.  
499 DeepLabCut provides excellent tracking of body parts from different species such as mice, flies,  
500 humans, fish, horses, and cheetahs (Nath et al. 2019), however, tracking of non-human primates was  
501 not reported so far. While we focus on instructed behavior, the current motion capture setting would  
502 allow quantifying 3-dimensional free behavior of non-human primates given an appropriate number  
503 of camera views.

504

## 505 *Conclusion*

506 Systems neuroscience can benefit substantially from the possibility of quantifying free behavior and  
507 simultaneously recording large-scale brain activity, particularly, but not only in sensorimotor research.  
508 This possibility opens a range of new opportunities, e.g. to study motor control of multi-joint and  
509 whole body movements, spatial cognition in complex workspaces, or social interactive behavior. With  
510 the opportunities that wireless technology offers, a desirable approach would be to let the monkey  
511 freely decide on their behavior to obtain neural correlates of most natural behavior (Gilja et al. 2010)  
512 while motion capture provides the related movement kinematics (Bala et al. 2020; Ballesta et al. 2014;  
513 Bansal et al. 2012; Mathis et al. 2018; Nakamura et al. 2016; Peikon et al. 2009). In fact, we consider  
514 it an important next step in systems neuroscience to demonstrate that the important and detailed  
515 knowledge that has been gained from tightly controlled experimental settings generalizes well to  
516 more naturalistic behaviors. Here, with the Reach Cage we present an experimental environment in  
517 combination with high-channel count wireless recording from multiple brain areas and with multi-  
518 joint markerless motion capture. We demonstrated that we can use this setting to study instructed  
519 behavior, for which it is easier to isolate different behavioral aspects of interest (movement planning,  
520 walking and reaching). This allowed us to isolate movement planning related activity to reach targets  
521 outside of the immediate reach. We could show that the frontoparietal reach network encodes such  
522 far-located reach goals.

523

524

## 525 **Materials and Methods**

### 526 *Animals*

527 Two male rhesus monkeys (*Macaca mulatta* K age: 6 years; and L age: 15 years) were trained in the  
528 Reach Cage. Both animals were behaviorally trained with positive reinforcement learning to sit in a  
529 primate chair. Monkey K did not participate in any research study before but was trained on a goal-  
530 directed reaching task on a touchscreen device in the home enclosure (Berger et al. 2017). Monkey L  
531 was experienced with goal-directed reaching on a touch screen and with a haptic manipulandum in a  
532 conventional chair-seated setting before entering the study (Morel et al. 2015). Both monkeys were  
533 chronically implanted with a transcutaneous titanium head post, the base of which consisted of four  
534 legs custom-fit to the surface of the skull. The animals were trained to tolerate periods of head  
535 fixation, during which we mounted equipment for multi-channel wireless recordings. We implanted  
536 six 32-channel floating microelectrode arrays (Microprobes for Life Science, Gaithersburg, Maryland)

537 with custom electrode lengths in three areas in the right hemisphere of cerebral cortex. Custom  
538 designed implants protected electrode connectors and recording equipment. The implant design and  
539 implantation procedures are described below.

540 Both animals were housed in social groups with one (monkey L) or two (monkey K) male conspecifics  
541 in facilities of the German Primate Center. The facilities provide cage sizes exceeding the requirements  
542 by German and European regulations, access to an enriched environment including wooden structures  
543 and various toys (Calapai et al. 2017). All procedures have been approved by the responsible regional  
544 government office [Niedersächsisches Landesamt für Verbraucherschutz und Lebensmittelsicherheit  
545 (LAVES)] under permit numbers 3392 42502-04-13/1100 and comply with German Law and the  
546 European Directive 2010/63/EU regulating use of animals in research.

547

#### 548 *MaCaQuE*

549 We developed the *Macaque Cage Query Extension (MaCaQuE)* to provide computer-controlled visual  
550 cues and reach targets at freely selectable individual positions in a monkey cage (Figure 1). MaCaQuE  
551 comprises a microcontroller-based interface, controlled via a standard PC, plus a variable number of  
552 *MaCaQuE* Cue and Target boxes (*MCT*).

553 The *MCT* cylinder is made of PVC plastic and has a diameter of 75 mm and a length of 160 mm. At one  
554 end of the cylinder the *MCTs* contain a capacitive proximity sensor (EC3016NPAPL, Carlo Gavazzi,  
555 Steinhausen, Switzerland) and four RGB-LEDs (WS2812B, Worldsemi Co., Daling Village, China), both  
556 protected behind a clear polycarbonate cover. With the LEDs, light stimuli of different color (8-bit color  
557 resolution) and intensity can be presented to serve as visual cues (Figure 1B). The LEDs surround the  
558 proximity sensor which registers when the monkey touches the middle of the polycarbonate plate  
559 with at least one finger. This way the *MCT* acts as a reach target. LEDs, sensor plus a custom printed  
560 circuit board for the controlling electronics and connectors are mounted to a custom designed 3D-  
561 printed frame made out of PA2200 (Shapeways, New York City, New York). A robust and lockable RJ45  
562 connector (etherCON, Neutrik AG, Schaan, Liechtenstein) connects the *MCT* to the interface unit from  
563 the opposite side of the cylinder via standard Ethernet cables mechanically protected inside flexible  
564 metal tubing. The RGB-LEDs require an 800 kHz digital data signal. For noise reduction, we transmit  
565 the signal with a differential line driver (SN75174N, SN74HCT245N, Texas Instruments Inc., Dallas,  
566 Texas) via twisted-pair cabling in the Ethernet cable to a differential bus transceiver (SN75176B,  
567 Texas Instruments Inc.) on the *MCT*. Ethernet cables are CAT 6, however, any other category would  
568 be suitable (CAT 1 up to 1 MHz). This setting allows us to use cables at least up to 15 m. Hence, there  
569 are no practical limits on the spatial separation between *MCTs* and from the interface for applications  
570 even in larger animal enclosures. We did not test longer cables. Apart from the one twisted-pair for  
571 the data stream of the RGB-LEDs, the Ethernet cable transmits 12 V power from the interface unit and  
572 the digital touch signal from the proximity sensor to the interface unit. The proximity sensor is directly  
573 powered by the 12 V line. The LEDs receive 5 V power from a voltage regulator (L7805CV,  
574 STMicroelectronics, Geneva, Switzerland) that scales the 12 V signal down. The PVC and polycarbonate  
575 enclosure of the *MCT* as well as the metal cable protection are built robustly enough to be placed  
576 inside a rhesus monkey cage. MaCaQuE incorporates up to two units to deliver precise fluid rewards  
577 (Calapai et al. 2017). Each unit consists of a fluid container and a peristaltic pump (OEM M025 DC,

578 Verderflex, Castleford, UK). MOSFET-transistors (BUZ11, Fairchild Semiconductor, Sunnyvale,  
579 California) on the interface unit drive the pumps.

580 The *MCTs* and reward systems are controlled by the Arduino-compatible microcontroller (Teensy 3.x,  
581 PJRC, Sherwood, Oregon) placed on a custom printed circuit board inside the interface unit (Figure  
582 1C). To operate a high number of *MCTs* the microcontroller communicates with the proximity sensor  
583 and LEDs using two serial data streams respectively. For the proximity sensor, we used shift registers  
584 (CD4021BE, Texas Instruments) that transform the parallel output from the *MCTs* to a single serial  
585 input to the microcontroller. The LEDs have an integrated control circuit to be connected in series. An  
586 additional printed circuit board connected to the main board contained 16 of the RGB-LEDs that  
587 receive the serial LED data stream from Microcontroller. We use this array of LEDs to convert the serial  
588 stream into parallel input to the *MCTs* by branching each input signals to the differential line drivers  
589 that transmit the signal to each *MCT*. To optimize the form factor of the interface unit we made a third  
590 custom printed circuit board that contains all connectors. In our current experiments, we assembled  
591 a circuit for connecting up to 16 *MCTs* but the MaCaQuE system would be easily expandable to a larger  
592 number. To set the transistors to drive the pumps of the reward systems, the 3.3V logic signal from  
593 the microcontroller is scaled up to 5V by a buffer (SN74HCT245N, Texas Instruments Inc., Dallas,  
594 Texas). Since MaCaQuE incorporates parts operating on 3.3V (microcontroller), 5V (LED array) and 12V  
595 (peristaltic pump and *MCT*), we used a standard PC-power supply (ENP-7025B, Jou Jye Computer  
596 GmbH, Grevenbroich, Germany) as power source. Additionally, twelve digital general-purpose-input-  
597 output (GPIO) pins are available on the interface, which were used to 1) send and receive  
598 synchronizing signals to other behavioral or neural recording hardware (strobe); 2) add a button to  
599 manually control reward units, and 3) add a switch to select which reward unit is addressed by the  
600 manual reward control. Further options like sending test signals or adding sensors or actuators are  
601 possible. Custom printed circuit boards are designed with EAGLE version 6 (Autodesk Inc., San Rafael,  
602 California).

603 We used Arduino-C to program the microcontroller firmware. *MaCaQuE* was accessed by a USB  
604 connection from a computer using either Windows or Mac OS. A custom-written C++ software  
605 package (MoRoCo) operated the behavioral task and interfaced with *MaCaQuE* via the  
606 microcontroller. We developed hardware testing software using Processing and C++. *MaCaQuE* was  
607 also used in another study involving human participants (Berger et al. 2019). Schematics and software  
608 is available online (<https://github.com/sensorimotorgroupdpz/MaCaQuE>).

### 609 *Reach Cage*

610 The Reach Cage is a cage-based training and testing environment for sensorimotor experiments with  
611 a physically unrestrained rhesus monkey (Figure 1A). Inner cage dimensions are 170 cm x 80 cm x  
612 85 cm (W x D x H) with a metal mesh grid on top and bottom, a solid metal wall one long side (back)  
613 and clear polycarbonate walls on all other sides. The idea of the experiment was to implement a  
614 memory-guided goal-directed reach task with instructed delay, equivalent to common conventional  
615 experiments (Crammond and Kalaska 2000), to compare neural responses during planning and  
616 execution of reaches towards targets at different positions in space.

617 We used *MaCaQuE* to provide ten visual cues and reach targets (*MCTs*) inside the cage (Figure 1D).  
618 Two *MCTs* were positioned on the floor pointing upwards. Eight were placed 25 cm below the ceiling  
619 in two rows of four each, pointing toward the middle position between the two *MCTs* on the floor.

620 The floor *MCTs* provided the starting position for the behavioral task (start buttons). The monkey  
621 could comfortably rest its hands on the start buttons while sitting or standing in between. The row of  
622 ceiling *MCTs* closer to the starting position was placed with a 10 cm horizontal distance and 60 cm  
623 vertical distance to the starting position (near targets). We chose this configuration to provide a  
624 comfortable position for a rhesus monkey to reach from the starting positions to the near targets  
625 without the need to relocate its body. The second row of *MCTs* was positioned at 100 cm horizontal  
626 distance from the starting positions (far targets) requiring the animal to make steps towards the  
627 targets (Figure 2B). An eleventh *MCT* was placed outside the cage in front of the monkey (when being  
628 in the starting position and facing the opposite wall) to provide an additional visual cue. For positive  
629 reinforcement training, *MaCaQuE's* reward systems can provide fluid reward through protected  
630 silicon and metal pipes into one of two small spoon-size stainless steel bowls mounted approx. 20 cm  
631 above the floor in the middle of either of the two long sides of the Reach Cage.

632

### 633 *Behavioral task*

634 We trained both monkeys on a memory-guided walk-and-reach task with instructed delay (Figure 2A).  
635 When the *MCT* outside lit up, the monkeys were required to touch and hold both start buttons (hand  
636 fixation). After 400 – 800 ms, one randomly chosen reach target lit up for 400 ms indicating the future  
637 reach goal (cue). The animals had to remember the target position and wait for 400 – 2000 ms  
638 (memory period) until the light of the *MCT* outside changed its color to red without changing the  
639 luminance (go cue). The monkeys then had a 600 ms time window starting 200 ms after the go cue to  
640 release the at least one hand from the start buttons. We introduced the 200 ms delay to discourage  
641 the animals from anticipating the go cue and triggering a reach prematurely. After releasing the start  
642 buttons, the animals needed to reach to the remembered target within 600 ms or walk-and-reach  
643 within 1200 ms dependent on whether the target was near or far. Provided the animals kept touching  
644 for 300 ms, the trial counted as correct indicated by a high pitch tone and reward. A lower tone  
645 indicated an incorrect trial. Reward was delivered by juice filled into one of two randomly assigned  
646 drinking bowls. We used unpredictable sides for reward delivery to prevent the animal from planning  
647 the movement to the reward before the end of the trial.

648 In the beginning, we did not impose the choice of hand on the monkeys in this study but let them  
649 freely pick their preferred hand. While monkey K reached to the targets with the right hand, monkey  
650 L used the left hand. Both animals consistently used their preferred hand and never switched. For the  
651 walk-and-reach task we trained monkey K to use its left hand using positive reinforcement training.  
652 Once trained, the monkey used consistently its left hand.

653 In a control session (Figure 5 – figure supplement 1) we added a passage in the middle of the walk-  
654 and-reach movements. The session was split into two blocks with (160/100 trials for monkey K/L) and  
655 without (154/178 trials for monkey K/L) this passage. The passage had an opening of 31 cm  
656 horizontally that constrained the animal's walk-and-reach movements to a narrower path. Reach  
657 movements were unaffected.

658 All data presented in this manuscript was collected after animals were trained on the behavioral task.

659



660 *Motion capture and analysis of behavior*

661 The animals' behavior was analyzed in terms of accuracy (percent correct trials), timing (as registered  
662 by the proximity sensors) and arm kinematics (video-based motion capture).

663 We analyzed start button release and movement times of both monkeys based on the *MCT* signals  
664 when they performed the walk-and-reach task (monkey K: 19 sessions; monkey L: 10 sessions). Button  
665 release time is the time between the go cue and the release of one of the start buttons. Movement  
666 time is the time between the release of one of the start buttons and target acquisition. We analyzed  
667 the timing separately for each monkey and separately for all near and all far targets.

668 Additionally, we tracked continuous head and arm kinematics in detail offline. We recorded four video  
669 streams in parallel from different angles together with the *MCT* signals and the neural data. For these  
670 synchronized multi-camera video recordings, we used a commercial video capture system (Cineplex  
671 Behavioral Research System, Plexon Inc., Dallas, Texas) incorporating four Stingray F-033/C color  
672 cameras (Allied Vision Technologies GmbH, Stadtroda, Germany). Videos were recorded with 60 fps  
673 frame rate in VGA resolution. Video processing on camera and host PC takes less than 20 ms (camera  
674 shutter opening time not included). The system uses a central trigger to synchronize all cameras. For  
675 synchronization with all other data, the system sent a sync pulse every 90 frames to *MaCaQuE*.

676 To quantify the movement trajectories, we tracked the 3-dimensional position of the left wrist, elbow,  
677 shoulder and headcap (part of the head implant, see below and Figure 6C, no 10) frame-by-frame  
678 when the monkeys performed the walk-and-reach task correctly. To do so, we first tracked the 2-  
679 dimensional position in each video and then reconstructed the 3-dimensional position out of the 2-  
680 dimensional data. For 2-dimensional markerless body-part tracking we used DeepLabCut (DLC), based  
681 on supervised deep neural networks to track visual features consistently in different frames of a video  
682 (Mathis et al. 2018). We trained a single network based on a 101 layer ResNet for all four cameras and  
683 both monkeys. Using DLC's own tools, we labeled in total 7507 frames from 12 sessions (4 monkey K  
684 and 8 monkey L). All training frames were randomly extracted from times at which the monkeys  
685 performed the walk-and-reach task correctly. We not only trained the model to track headcap, left  
686 wrist, elbow and shoulder but also snout, left finger, right finger, wrist, elbow, shoulder, tail and four  
687 additional points on the headcap. While those additional body parts were less often visible with this  
688 specific camera setting and not of interest for our current study, the tracking of certain desired  
689 features can be improved by training DLC models to additional other features (see Mathis et al. 2018  
690 for details). We used cross-validation to estimate the accuracy of DLC in our situation, using 95% of  
691 our labeled data as training data for the model and 5% as test data. The model provides a likelihood  
692 estimate for each data point. We removed all results with a likelihood of less than 0.9. For the  
693 remaining data points of all ten features, the root mean squared error was 2.57 pixels for the training  
694 and 4.7 pixels for test data. With this model we estimated the position of the body parts in each video.  
695 Then we reconstructed the 3-dimensional position using the toolbox pose3d (Sheshadri et al. 2020).  
696 First, we capture images from a checkerboard with defined length on all four cameras at the same  
697 time. Using the Computer Vision Toolbox from Matlab (Mathworks Inc., Natick, Massachusetts), we  
698 estimated the camera calibration parameters for each camera and for each camera pair. Pose3d uses  
699 those parameters to triangulate the 3-dimensional position from at least two camera angles. If feature  
700 positions from more than two cameras are available, pose3d will provide the least-squares estimate.  
701 By projecting the 3-dimensional position back into 2-dimensional camera coordinates we could

702 measure the reprojection error. We excluded extreme outlier with a reprojection error above 50 pixels  
703 for at least one camera.

704 After the reconstruction of the 3-dimensional positions of the body parts, we performed an outlier  
705 analysis. First, we applied a boundary box with the size of 132 cm x 74 cm x 75 cm (W x D x H) and  
706 removed data points that lied outside the box. Second, we looked for outliers based on discontinuity  
707 over time (aka speed). We calculated the Euclidean distance between each consecutive time points  
708 for each body part trajectory and applied a threshold to detect outlier. We only reject the first and  
709 every second outlier, since a single outlier will lead to two “jumps” in the data. Then we reiterate the  
710 process until all data points are below threshold. We applied different threshold for each body part  
711 and dependent on whether the frame was during a movement (between start button release and  
712 target acquisition) or not. Specifically, we used 12 mm/frame and 80 mm/frame for the wrist and  
713 15 mm/frame and 40 mm/frame for the other body parts with the higher threshold during the  
714 movement. With a frame rate of 60 fps, 100 mm/frame corresponds to 6 m/s. After rejecting all outlier  
715 (DeepLabCut low likelihood, reprojection error, boundary box and discontinuity) the percentage of  
716 valid data points of all 7 analyzed sessions during correctly performed trials for Monkey K/L was: wrist  
717 94.93%; elbow 92.51%; shoulder 94.98%; headcap 97.58%. We interpolated the missing data points  
718 using phase preserving cubic interpolation.

719 We analyzed the movement trajectories of the four body parts during reach and walk-and-reach  
720 movements. For the behavioral analysis (2/3 sessions, 469/872 successful trials monkey K/L) we  
721 choose the time window between 100 ms before start button release and 100 ms after target  
722 acquisition (Figure 3). For the analysis with neural data (231/326 successful trials monkey K/L one  
723 session each) we choose the time window between 300 ms before start button release and 300 ms  
724 after target acquisition (Figure 5). In both cases, we used linear interpolation for temporal alignment  
725 of the data between trials and relative to the neural data in the latter case. For trial averaging, we  
726 average over the data across trials on each aligned time point for each dimension. The 3-dimensional  
727 data is presented from a side-view (Figure 3) and top-view (Figure 5) of the movement. The side-view  
728 is defined by one of the four cameras directly facing the side of the Reach Cage. Arm posture plots are  
729 straight lines connecting wrist with elbow, elbow with shoulder and shoulder with headcap. For the  
730 variability analysis, we calculate the Euclidean distance at each time point and trial to the trial  
731 averaged trajectory for each target and body part. We then averaged the distances over all time points  
732 for each trial and present the median and 0.75-quartile for each body part and target distance pooled  
733 over the target position. For the control session with a narrow passage (Figure 5 – figure supplement  
734 1, 314/278 successful trials monkey K/L one session each) we additionally analyzed the spread of the  
735 wrist and head position of the walk-and-reach movements over trials at a 40 cm distance from the  
736 animals’ average wrist starting position. We report range, and s.d. over the axis orthogonal to the side-  
737 view, i.e. the target axis and use Kolmogorow-Smirnow test to test if the distributions with and without  
738 narrow passage differ.

739 The behavioral analyses were performed using Matlab with the data visualization toolbox *gramm*  
740 (Morel 2018). The 2-dimensional feature tracking with DeepLabCut was done in Python (Python  
741 Software Foundation, Beaverton, Oregon).

742

743

744 *Implant system design*

745 Wireless neural recordings from the cerebral cortex of rhesus monkeys during minimally restrained  
746 movements require protection of the electrode array connectors and the headstage electronics of the  
747 wireless transmitters. We designed a protective multi-component implant system to be mounted on  
748 the animal skull (Figure 6). The implant system and implantation technique was designed to fulfill the  
749 following criteria: 1) Electrode connectors need to be protected against dirt and moisture; 2) While  
750 the animal is not in the experiment, the implants need to be small and robust enough for the animal  
751 to live unsupervised with a social group in an enriched large housing environment; 3) During the  
752 experiment, the wireless headstage needs to be protected against manipulation by the animal and  
753 potential physical impacts from bumping the head; 4) The head-mounted construction should be as  
754 lightweight as possible; 5) Placing of the electrode arrays and their connectors during the surgery  
755 needs to be possible without the risk of damaging electrodes, cables, or the brain; 6) Implant  
756 components in contact with organic tissue need to be biocompatible; 7) Temporary fixation of the  
757 animal's head in a primate chair needs to be possible for having access to implants and for wound  
758 margin cleaning; 8) Implants must not interfere with wireless signal transmission; 9) Optionally, the  
759 implant may serve as trackable object for motion capture.

760

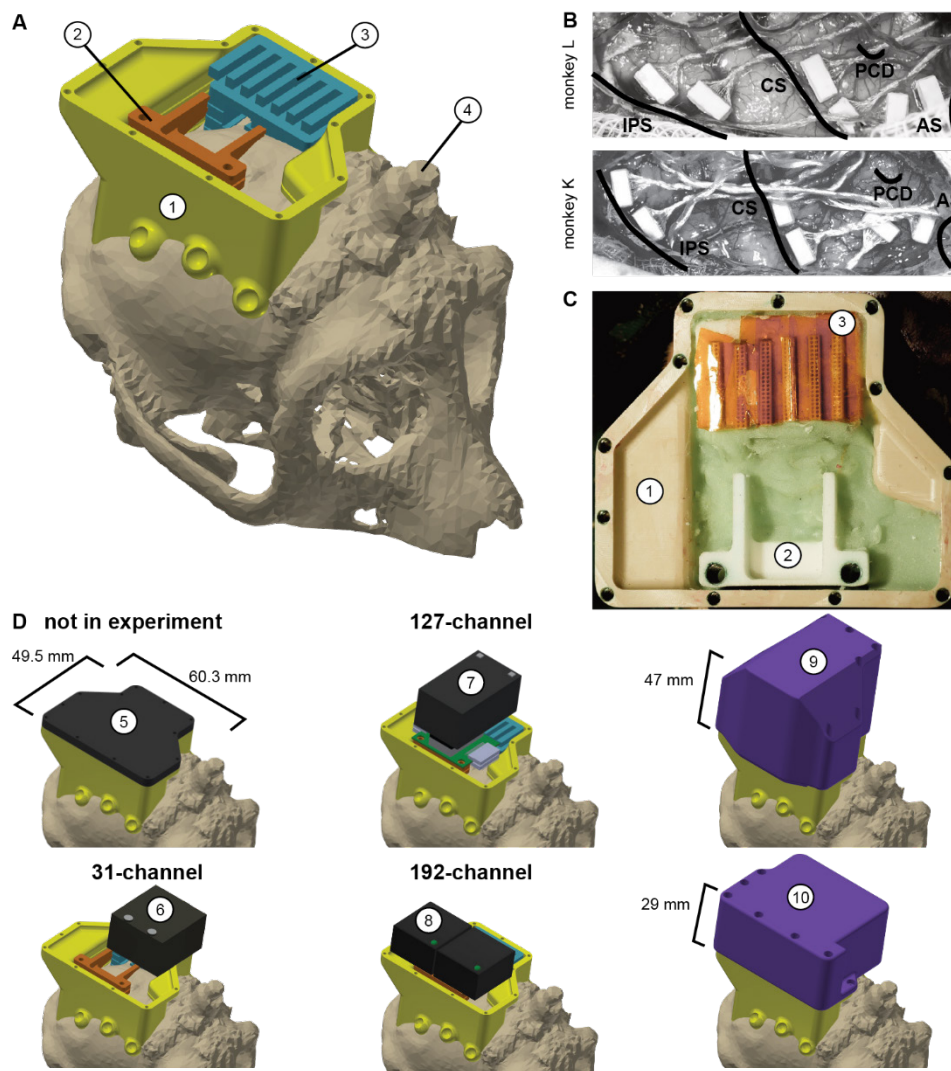

761

762 **Figure 6: Implant system design.** A) 3-dimensional computer models of the implants and electronics. The skull model of  
763 monkey L (beige) is extracted from a CT scan including the titanium implant for head fixation (4, headpost) which was already  
764 implanted before this study. Further implants are colored for illustrative purposes and do not necessarily represent the actual  
765 colors. B) Image of microelectrode array placement during the surgery of monkey L (top) and monkey K (bottom). Anatomical  
766 landmarks descriptions: IPS – intraparietal sulcus; CS – central sulcus; PCD – postcentral dimple; AS – arcuate sulcus. C) Image  
767 of the implants on monkey L's head. D) Different configurations of wireless headstages and protective headcaps temporally  
768 mounted on the implants. Numbers indicate: 1 - chamber; 2 - adapter board holder; 3 - array connector holder; 4 - headpost  
769 (from CT scan); 5 – flat headcap; 6 - W32 headstage; 7 - W128 headstage; 8 - Exilis headstage (two used in parallel); 9 –  
770 headcap for W128 headstage; 10 - headcap for W32 or Exilis headstages.

771 We designed the implant system for two main configurations: first, a home configuration containing  
772 only permanently implanted components and being as small as possible when the animal is not in a  
773 recording session but in its group housing (Figure 6D, top left); second, a recording configuration with  
774 removable electronic components being attached. This configuration should either fit a 31-channel  
775 headstage, a 127-channel headstage (W32/W128, Triangle BioSystems International, Durham, North  
776 Carolina) or two 96-channel headstages (CerePlex Exilis, Blackrock Microsystems LLC, Salt Lake City,  
777 Utah). Headstage placement is illustrated in Figure 6D. The implant system consists of four custom-  
778 designed components: a skull-mounted outer encapsulation (chamber; Figure 6A/C, no 1), a mounting  
779 base for holding a custom-designed printed circuit board (adaptor board holder, no 2), a mounting  
780 grid to hold the connectors of the electrode arrays (connector holder, no 3), and a set of different-  
781 sized caps to contain (or not) the different wireless headstages (no 5-10). Dimensions of the wireless  
782 headstages are W32: 17.9 mm x 25 mm x 14.2 mm (W x D x H), 4.5g weight; W128: 28.7 mm x 34.3  
783 mm x 14.2 mm (W x D x H), 10 g weight; Exilis: 25 mm x 23 mm x 14 mm (W x D x H), 9.87g weight.

784 We designed the implants custom-fit to the skull by using CT and MRI scans. Using 3D Slicer (Brigham  
785 and Women's Hospital Inc., Boston, Massachusetts), we generated a skull model out of the CT scan  
786 (Figure 6A) and a brain model out of the MRI scan (T1-weighted; data not shown). In the MRI data we  
787 identified the target areas for array implantation based on anatomical landmarks (intraparietal,  
788 central, and arcuate sulci; pre-central dimple), and defined Horsley-Clarke stereotactic coordinates for  
789 the craniotomy necessary for array implantation (Figure 6B). We used stereotactic coordinates  
790 extracted from the MRI scan to mark the planned craniotomy on the skull model from the CT scan.  
791 We then extracted the mesh information of the models and used Inventor (Autodesk Inc., San Rafael,  
792 California) and CATIA (Dassault Systèmes, Vélizy-Villacoublay, France) to design virtual 3-dimensional  
793 models of the implant components which are specific to the skull geometry and planned craniotomy.  
794 Both monkeys already had a titanium headpost implanted of which the geometry, including subdural  
795 legs, was visible in the CT (Figure 6A, no 4), and, therefore, could be incorporated in our implant  
796 design.

797 We built the chamber to surround the planned craniotomy and array connectors (Figure 6A/C, no 1).  
798 The chamber was milled out of polyether ether ketone (TECAPEEK, Ensinger GmbH, Nufringen,  
799 Germany) to be lightweight (monkey K/L: 10/14 grams; 65/60.3 mm max. length, 50/49.5 mm max.  
800 width, 24.9/31.2 mm max. height; wall thickness: 2/2 mm) and biocompatible. For maximal stability  
801 despite low diameter, stainless-steel M2 threads (Helicoil, Böllhoff, Bielefeld, Germany) were inserted  
802 in the wall for screwing different protective headcaps onto the chamber. The built-in eyelets at the  
803 outside bottom of the chamber wall allow mounting of the chamber to the skull using titanium bone  
804 screws (2.7 mm corticalis screws, 6-10 mm length depending on bone thickness, DePuy Synthes,  
805 Raynham, Massachusetts). Fluting of the lower half of the inner chamber walls let dental cement  
806 adhere to the chamber wall.



807 The subdural 32-channel floating microelectrode arrays (FMA, Microprobes for Life Science) are  
808 connected by a stranded gold wire to an extra-corporal 36-pin nano-strip connector (Omnetics  
809 Connector Corporation, Minneapolis, Minnesota). We constructed an array connector holder to hold  
810 up to six of the Omnetics connectors inside the chamber (Figure 6A/C, no 3). The connector holder  
811 was 3D-printed in a very lightweight but durable and RF-invisible material (PA2200 material,  
812 Shapeways). The holding grid of the array connector holder is designed such that it keeps the six  
813 connectors aligned in parallel with 2mm space between. The spacing allows to either: 1) connect six  
814 32-channel Cereplex (Blackrock Microsystems LLC) headstages for tethered recording simultaneously  
815 on all connectors, 2) directly plug a 31-channel wireless system onto one of the array connectors, or  
816 3) flexibly connect four out of six arrays with adaptor cables to an adaptor board, linking the arrays to  
817 a 127-channel wireless system. The total size of the array connector is 27 mm x 16.2 mm incorporating  
818 all six connectors. The bottom of the array connector holder fits the skull geometry with a cut-out to  
819 be placed above an anchor screw in the skull for fixation with bone cement (PALACOS, Heraeus  
820 Medical GmbH, Hanau, Germany). This is needed since the array connector is placed on the skull next  
821 to the craniotomy during insertion of the electrode arrays, i.e. before implantation of the surrounding  
822 chamber (see below). The medial side of the holding grid, pointing to the craniotomy, is open so that  
823 we can slide in the array connectors from the side during the surgery. On the lateral side small holes  
824 are used to inject dental cement with a syringe to embed and glue the connectors to the grid.

825 The 31-channel wireless headstage can be directly plugged into a single Omnetics nano-strip array  
826 connector. The 127-channel wireless headstage instead has Millmax strip connectors (MILL-MAX MFG.  
827 CORP., Oyster Bay, New York) as input. A small adapter board (electrical interface board, Triangle  
828 BioSystems International) builds the interface to receive up to four Omnetics nano-strip connectors  
829 from the implanted arrays via adaptor cables (Omnetics Connector Corporation). We constructed a  
830 small holder with two M3 Helicoils for permanent implantation to later screw-mount the adaptor  
831 board when needed during recording (Figure 6A/C, no 2). Fluting on the sides of the adaptor board  
832 holder helps embedding of the holder into dental cement. Like the array connector holder, the adaptor  
833 board holder was 3D-printed in PA2200. The 96-channel Exilis headstages have three Omnetics nano-  
834 strip connectors which would fit into the array connectors, however, a precise alignment very difficult  
835 due to the small size of the connector. Instead we relied on adapter cables, like with the 127-channel  
836 headstage, to connect headstage and array connectors. The two headstages fit perfectly in the  
837 protective headcap (Figure 6D, no 10) which also prevents movements of the headstages itself.

838 Depending on the experiment and space needed, we used three different protective headcaps. While  
839 the animal was not in an experiment, a flat 4 mm machine-milled transparent polycarbonate headcap  
840 with rubber sealing protected the connectors against moisture, dirt and manipulations (Figure 6D, no  
841 5). During experiments, we used two specifically designed protective headcaps for the two different  
842 wireless headstages. Both were 3D-printed in PA2200 in violet color to aid motion capture. Since the  
843 31-channel wireless headstage is connected to the array connectors directly, it extends over the  
844 chamber walls when connected to one of the outermost connectors (Figure 6D, no 6). We designed  
845 the respective protective headcap to cover this overlap (Figure 6D, no 10). The 127-channel wireless  
846 headstage (Figure 6D, no 7) with its adapter board is higher and overlaps the chamber on the side  
847 opposite to the connectors. We designed the respective headcap accordingly (Figure 6D, no 9). The  
848 two 96-channel Exilis Headstages were used with the smaller headcap (no 10). For Monkey L, we 3D-  
849 printed a version with slightly larger inner dimensions in green PLA using fused deposit modeling.



850 Since the 3D-printed headcaps were only used during recording sessions, i.e. for less than 2h, without  
851 contact to other animals, and under human observation, we did not add extra sealing against  
852 moisture. However, by adding a rubber sealing, the internal electronics would be safe even for longer  
853 periods of time in a larger and enriched social-housing environment without human supervision.

854

#### 855 *Surgical Procedure*

856 The intracortical electrode arrays and the permanent components of the chamber system were  
857 implanted in a single sterile surgery under deep gas anesthesia and analgesia via an IV catheter.  
858 Additionally, the animals were prophylactically treated with Phenytoin (5-10 mg/kg) for seizure  
859 prevention, starting from one week before surgery and continuing until two weeks post-surgery  
860 (fading-in over 1 week), and with systemic antibiotics (monkey K: Cobactan 0.032 ml/kg and Synolux  
861 0.05 ml/kg one day pre-surgery and two days post-surgery; monkey L: Duphamox, 0.13 ml/kg, one day  
862 pre-surgery to one day post-surgery). During craniotomy, brain pressure was regulated with Mannitol  
863 (monkey K/L: 16/15.58 ml/kg; on demand). Analgesia was refreshed on a 5-h cycle continuously for  
864 four post-surgical days using Levomethadon (0.28/0.26 mg/kg), daily for one/three post-surgical days  
865 using Metacam (0.24/0.26 mg/kg) and for another four days (Rimadyl, 2.4/1.94 mg/kg) according to  
866 demand.

867 We implanted six FMAs in the right hemisphere of both monkeys. Each FMA consists of 32 Parylene-  
868 coated Platinum/Iridium electrodes and four ground electrodes arranged in four rows of nine  
869 electrodes (covering an area of 1.8 mm x 4 mm) staggered in length row-wise with the longest row  
870 being opposite of the cable and the shortest row closest to the cable. Two FMAs were placed in each  
871 of the three target areas: parietal reach region (PRR), dorsal premotor cortex (PMd) and arm-area of  
872 primary motor cortex (M1). MRI scans were used to define desired array positions and craniotomy  
873 coordinates. Since we did not know the location of blood vessels beforehand, the final placing of the  
874 arrays was done based on the visible anatomical landmarks. PRR arrays were positioned along the  
875 medial wall of the intraparietal sulcus (IPS) starting about 7 mm millimeters away from the parieto-  
876 occipital sulcus (Figure 6B), with electrode lengths of 1.5 – 7.1 mm. M1 arrays were positioned along  
877 the frontal wall of the central sulcus, at a laterality between precentral dimple and arcuate spur, with  
878 electrode lengths of 1.5 – 7.1 mm. The longer electrodes of PRR and M1 arrays were located on the  
879 side facing the sulcus. PMd arrays were positioned, between arcuate spur, precentral dimple and the  
880 M1 arrays as close to the arcuate spur, with electrode lengths of 1.9 – 4.5 mm.

881 Except for the steps related to our novel chamber system, the procedures for FMA implantation were  
882 equivalent to what was described in (Schaffelhofer et al. 2015). The animal was placed in a stereotaxic  
883 instrument to stabilize the head and provide a Horsley-Clarke coordinate system. We removed skin  
884 and muscles from the top of the skull as much as needed based on our pre-surgical craniotomy  
885 planning. Before the craniotomy, we fixed the array connector holder to the skull with a bone screw  
886 serving as anchor and embedded in dental cement on the hemisphere opposite to the craniotomy.  
887 After removing the bone with a craniotome (DePuy Synthes) and opening the dura in a U-shaped flap  
888 for later re-suturing, we oriented and lowered the microelectrode arrays one-by-one using a manual  
889 micro-drive (Narishige International Limited, London, UK), which was mounted to the stereotaxic  
890 instrument on a ball-and-socket joint. Before insertion, the array connector was put into our array  
891 connector holder and fixed with a small amount of dental cement. During insertion, the array itself

892 was held at its back plate by under-pressure in a rubber-coated tube connected to a vacuum pump  
893 which was attached to the microdrive. We slowly lowered the electrodes about 1 mm every 30  
894 seconds until the back plate touched the dura mater. We let the array rest for four minutes before  
895 removing first the vacuum and then the tube.

896 After implanting all arrays, we arranged the cables for minimal strain and closed the dura with sutures  
897 between the cables. We placed Duraform (DePuy Synthes) on top, returned the leftover bone from  
898 the craniotomy and filled the gaps with bone replacement material (BoneSource, Stryker, Kalamazoo,  
899 Michigan). We sealed the craniotomy and covered the exposed bone surface over the full area of the  
900 later chamber with Super-Bond (Sun Medical Co Ltd, Moriyama, Japan). We secured the array cables  
901 at the entry point to the connectors and filled all cavities in the array connector holder with dental  
902 cement. We mounted the chamber with bone screws surrounding implants and craniotomy,  
903 positioned the adaptor board holder, and filled the inside of the chamber with dental cement (Figure  
904 6C). Finally, we added the flat protective headcap on the chamber.

905

#### 906 *Neural recordings*

907 Neural recordings were conducted in both monkeys during the walk-and-reach task in the Reach Cage.  
908 We recorded wirelessly from all six arrays simultaneously using the two 96-channel Exilis Headstages.  
909 To remove interference between the two headstages, we placed a small metal plate between the two  
910 headstages which was connected to the ground of one headstage. We used seven antennas in the  
911 cage which were all connected to both receivers for the respective headstage. The headstages used  
912 carrier frequencies of 3.17 GHz and 3.5 GHz respectively. The signal was digitized on the headstages  
913 and sent to two recordings systems, one for each headstage. We used a 128-channel Cerebus system  
914 and a 96-channel CerePlex Direct system (both Blackrock Microsystems LLC) for signal processing.  
915 MaCaQuE sent the trial number at the beginning of each trial to the parallel port of both systems. We  
916 connected an additional shift register M74HC595 (STMicroelectronics) to the GPIO port of MaCaQuE  
917 for interfacing the parallel ports. The recording systems recorded the trial number along with a time  
918 stamp for offline data synchronization.

919 We calculated data loss rate per trial on the broadband data. The headstage transmits digital data.  
920 When it loses connection the recording system repeats the latest value. Since wireless data is  
921 transmitted in series, a connection loss affects all channels. We looked in the first 32 channels of the  
922 broadband data for at least four consecutive times for which the data did not change. Then we labeled  
923 all consecutive time points as 'data lost' for which the data did not change. We did this for both 96-  
924 channel recording separately. Since we wanted to estimate the reliability of the 192-channel  
925 recording, we considered data loss at times were even only headstage showed data loss. Then we  
926 calculated the percentage of time points with data loss for each session only considering times within  
927 trials for which the monkey performed the task correctly. We also calculated the data loss for each  
928 trial separately. Only trials with data loss smaller than 5% were considered for further analysis.

929 We performed the preprocessing of broadband data and the extraction of waveforms as previously  
930 described (Dann et al. 2016). First, the raw signal was high-pass filtered using a sliding window median  
931 with a window length of 91 samples (~3 ms). Then, we applied a 5000 Hz low-pass using a zero-phase  
932 second order Butterworth filter. To remove common noise, we transformed the signal in PCA space

933 per array, removed principle components that represented common signals and transformed it back  
934 (Musial et al. 2002). On the resulting signal, spikes were extracted by threshold crossing using a  
935 negative or positive threshold. We sorted the extracted spikes manually using Offline Sorter V3  
936 (Plexon Inc., Dallas, Texas). If single-unit isolation was not possible, we assigned the non-differentiable  
937 cluster as multi-unit, but otherwise treated the unit the same way in our analysis. The spike density  
938 function for the example units were computed by convolving spike trains per trial and per unit with a  
939 normalized Gaussian with standard deviation of 50 ms. The spike density function was sampled at 200  
940 Hz. This was done for spike density plots of example units (Figure 4) and before factor analysis for  
941 estimating latent dimensions (Figure 5). The exemplary broadband data in Figure 4 shows the data  
942 before preprocessing.

943 We analyzed the firing rate of all 192-channels in the 12 sessions and of four example units with  
944 respect to four different temporal alignments: target cue onset, go cue, start button release and target  
945 acquisition. To quantify neural activity during the delay period and the movement, we analyzed time  
946 windows of 500 ms either immediately before or after a respective alignment. We analyzed the  
947 modulation of firing rate relative to the position of the reach targets and time window for each unit.  
948 We calculated an ANOVA with factors distance (near, far), position (outer left, mid left, mid right, outer  
949 right) and time (before and after the respective alignments, 8 time windows). We considered a  
950 channel/unit task modulated if there was a significant effect on any factor or interaction. We  
951 considered it position modulated if there was a significant main effect on position or an effect on  
952 position x distance, position x time or position x distance x time.

953 For the population decoding analysis we used a linear support vector machine (SVM) on the firing rate  
954 within 300 ms time windows. We decoded left vs right side, i.e., grouped left-outer and left-mid  
955 targets as well as right-outer and right-mid targets. Reach and walk-and-reach movements were  
956 analyzed separately. Decoding accuracy was estimated by 20-fold cross validation. The 20 folds always  
957 referred to the same trials in each window throughout the timeline. For statistical testing we focused  
958 on one time window during memory and one during movement period, respectively. Since the  
959 shortest trials have a memory period of 400 ms we selected 100 – 400 ms after the cue as the window  
960 for the memory period. For the movement period, we selected 300 – 0 ms before target acquisition.  
961 Those windows were tested against a baseline time window 400 – 100 ms before the onset of the  
962 target cue. We used a paired one-tailed t-test to test if the decoding accuracy is above the baseline  
963 accuracy. We used Bonferroni multiple comparison correction with a multiplier of 12 (3 areas x 2  
964 movements x 2 time periods). For the control session with the passage for walk-and-reach movements  
965 (Figure 5 – figure supplement 1), we tested if the decoding accuracy changed depending on whether  
966 or not the passage is present. We used an unpaired two-tailed t-test with a Bonferroni multiplier of 6  
967 (3 areas x 2 time periods).

968 Raw data and spike data processing was performed with Matlab and visualized using the toolbox  
969 *gramm* (Morel 2018).

970

## 971 **Acknowledgements**

972 We thank Sina Plümer for help with data collection and technical support, Klaus Heisig and Marvin  
973 Kulp for help with mechanical constructions, Swathi Sheshadri, Benjamin Dann and Baltasar Rüdhardt

974 for help with motion capture, Peer Strogies for help with implant design, Attila Trunk and Ole  
975 Fortmann for help with data collection, Pierre Morel, Enrico Ferrea, Michael Fauth, Jan-Matthias  
976 Braun, Christian Tetzlaff and Florentin Wörgötter for helpful discussions, Leonore Burchardt for help  
977 with animal training and Janine Kuntze, Luisa Klotz and Dirk Prüße for technical support.

978

## 979 **Competing Interests**

980 None declared

981

## 982 **Rich Media Files**

- 983 • **Video 1:** 3-dimensional animation of the Reach Cage
- 984 • **Video 2:** The video shows reaching movements by monkey K with motion capture labels from  
985 all four cameras. One example trial for near reach target is depicted.
- 986 • **Video 3:** The video shows reaching movements by monkey L with motion capture labels from  
987 all four cameras. One example trial for each near target is depicted.
- 988 • **Video 4:** The video shows walk-and-reach movements by monkey K with motion capture  
989 labels from all four cameras. One example trial for each far target is depicted.
- 990 • **Video 5:** The video shows walk-and-reach movements by monkey L with motion capture labels  
991 from all four cameras. One example trial for each far target is depicted.

992

## 993 **Supplementary Files**

- 994 • **Supplementary file 1:** Overview of neurophysiology studies with unrestrained monkeys. This  
995 table present an overview of current neurophysiology studies with unrestrained monkeys. The  
996 Reach Cage provides the only environment capable of instructing the animal to control start  
997 and end times of a desired movement which for example allows to train animals to withhold  
998 a movement and study movement planning. Also, while previous studies studied a variety of  
999 behavior, instructed goal directed movements were always direct food (source) directed  
1000 movements. Only the Reach Cage can dissociate motor goals from food sources. There four  
1001 other studies that present multiple movement goals. There are locomotion studies that  
1002 incorporate 3D motion capture but not markerless and none showed 3D kinematics of  
1003 reaching behavior. Note that other studies have shown 3D markerless motion capture of  
1004 freely behaving monkeys (Bala et al. 2020; Nakamura et al. 2016), however, without  
1005 neurophysiological recordings.

1006

1007 **Figure Supplements**

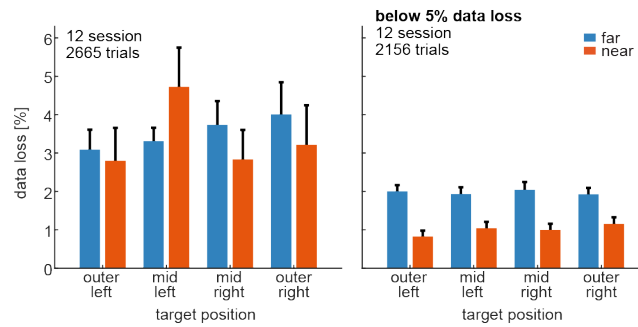

1008

1009

1010

1011

1012

1013

1014

1015

1016

1017

- **Figure 4 – figure supplement 1: Data loss rate per target.** The figure shows the data loss rate of all trials per target position and distance (color coded). The left plot indicates all successful trials of all 12 sessions (2 monkey K and 10 monkey L). Bars indicate the mean and error bars the bootstrapped confidence interval. Data loss rate is slightly modulated by target position and distance x position (left panel and Figure 4 – source data 1). This bias is introduced by a small fraction of trials with high data loss. We removed all trials with data loss of 5% or higher (right plot) for the data analyses presented in the main manuscript. When we did this, no bias by target position was observed within near or within far trials (right panel; Figure 4 – source data 2).



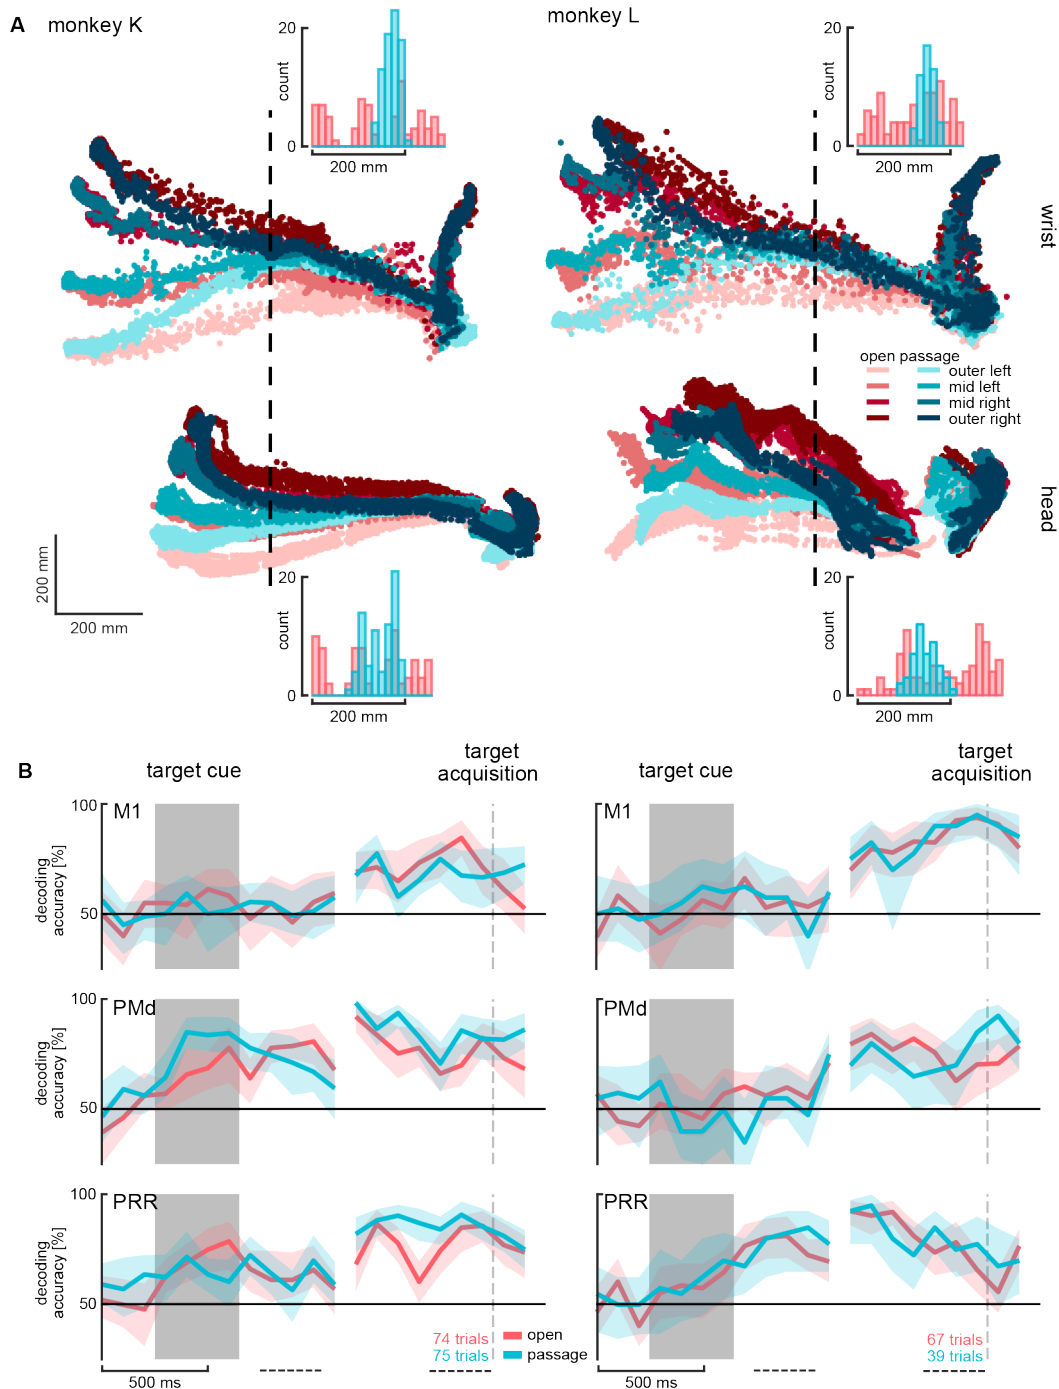

1018

1019

1020

1021

1022

1023

1024

1025

1026

1027

1028

• **Figure 5 – figure supplement 1: Decoding walk-and-reach goals with different walking paths.**

To test if target location decoding accuracy (figure 5) of walk-and-reach trials depends on the walking path, we recorded one session for each monkey. The sessions contained reach and walk-and-reach trials; however, we only perform the decoding analysis on walk-and-reach trials here. The sessions contained two blocks: one as presented in the results part of the manuscript (red color) and another with a narrow passage introduced in the middle of the walking path in a 40 cm distance to the wrist starting position (blue color). See methods for more details. A) Top view of wrist (top) and head (bottom) trajectories for the eight reach and walk-and-reach targets during trials with and without the passage. Horizontal axis is the same for wrist and head. Histogram plots show the marker position distribution on the vertical axis

1029 at the point of the dashed line. The distribution with the passage is different from the one  
1030 without (Kolmogorow-Smirnow test  $p < 0.001$  for wrist and head of both animals) with a  
1031 smaller range (open/passage for monkey K: wrist 276 mm / 74 mm; head: 250 mm/ 106 mm  
1032 and monkey L: wrist 218 mm / 61 mm ; head: 311 mm / 117 mm) and s.d. (open/passage for  
1033 monkey K: wrist 88 mm / 17 mm; head: 82 mm/ 32 mm and monkey L: wrist 64 mm / 15 mm ;  
1034 head: 83 mm / 26 mm). B) SVM decoding accuracy of left-right walk-and-reach target  
1035 direction. Plot shows 20-fold cross validation on 300 ms sliding overlapping sliding window.  
1036 There was no significant difference between trials with and without the narrow passage in the  
1037 memory (100 – 400 ms after target cue, dashed line) or movement period (300 – 0 ms before  
1038 target acquisition, dashed line) of any monkey in any brain area. Statistical test was a two-  
1039 tailed t-test with Bonferroni correction (See figure 5 – source data 2)

1040

## 1041 Source Data

- 1042 • **Figure 4 – source data 1:** Data loss rate differences across targets for all trials. Two-way  
1043 ANOVA table; “\*” indicates significance with  $p < 0.05$ .
- 1044 • **Figure 4 – source data 2:** Data loss rate differences across targets for trials below 5% data  
1045 loss. Two-way ANOVA table; “\*” indicates significance with  $p < 0.05$ .
- 1046 • **Figure 5 – source data 1:** Test for significant decoding accuracy above baseline. Paired one-  
1047 tailed t-tests on SVM decoding accuracy; “\*” indicates Bonferroni corrected significance with  
1048  $p < 0.0042$ .
- 1049 • **Figure 5 – source data 2:** Test of change in decoding accuracy between trials with and  
1050 without passage. Two-tailed t-tests on SVM decoding accuracy differences between with  
1051 and without passage; “\*” indicates Bonferroni corrected significance with  $p < 0.0083$ .

1052

1053

## 1054 References

1055 **Aflalo TN, Kellis S, Klaes C, Lee B, Shi Y, Pejsa K, Shanfield K, Hayes-Jackson S, Aisen M, Heck C, Liu**  
1056 **C, Andersen RA.** Decoding motor imagery from the posterior parietal cortex of a tetraplegic human.  
1057 *Science* 348: 906–910, 2015.

1058 **Bala PC, Eisenreich BR, Bum S, Yoo M, Hayden BY, Park HS, Zimmermann J.** OpenMonkeyStudio :  
1059 Automated Markerless Pose Estimation in Freely Moving Macaques. *bioarxiv* 1–12, 2020.

1060 **Ballesta S, Reymond G, Pozzobon M, Duhamel J-R.** A real-time 3D video tracking system for  
1061 monitoring primate groups. *J Neurosci Methods* 234: 147–152, 2014.

1062 **Bansal AK, Truccolo W, Vargas-Irwin CE, Donoghue JP.** Decoding 3D reach and grasp from hybrid  
1063 signals in motor and premotor cortices: spikes, multiunit activity, and local field potentials. *J*  
1064 *Neurophysiol* 107: 1337–1355, 2012.

1065 **Batista AP, Buneo CA, Snyder LH, Andersen RA.** Reach plans in eye-centered coordinates. *Science*  
1066 285: 257–260, 1999.

1067 **Berger M, Calapai A, Stephan V, Niessing M, Burchardt L, Gail A, Treue S.** Standardized automated

- 1068 training of rhesus monkeys for neuroscience research in their housing environment. *J Neurophysiol*  
1069 119: 796–807, 2017.
- 1070 **Berger M, Neumann P, Gail A.** Peri-hand space expands beyond reach in the context of walk-and-  
1071 reach movements. *Sci Rep* 9: 3013, 2019.
- 1072 **Berti A, Frassinetti F.** When far becomes near: Remapping of space by tool use. *J Cogn Neurosci* 12:  
1073 415–420, 2000.
- 1074 **Bjoertomt O, Cowey A, Walsh V.** Spatial neglect in near and far space investigated by repetitive  
1075 transcranial magnetic stimulation. *Brain* 125: 2012–2022, 2002.
- 1076 **Blanke O, Slater M, Serino A.** Behavioral, neural, and computational principles of bodily self-  
1077 consciousness. *Neuron* 88: 145–166, 2015.
- 1078 **Bonini L, Maranesi M, Livi A, Fogassi L, Rizzolatti G.** Space-Dependent Representation of Objects  
1079 and Other’s Action in Monkey Ventral Premotor Grasping Neurons. *J Neurosci* 34: 4108–4119, 2014.
- 1080 **Botvinick M, Cohen J.** Rubber hands “feel” touch that eyes see. *Nature* 391: 756, 1998.
- 1081 **Bouton CE, Shaikhouni A, Annetta N V., Bockbrader MA, Friedenber DA, Nielson DM, Sharma G,  
1082 Sederberg PB, Glenn BC, Mysiw WJ, Morgan AG, Deogaonkar M, Rezai AR.** Restoring cortical  
1083 control of functional movement in a human with quadriplegia. *Nature* 533: 247–250, 2016.
- 1084 **Brozzoli C, Cardinali L, Pavani F, Farnè A.** Action-specific remapping of peripersonal space.  
1085 *Neuropsychologia* 48: 796–802, 2010.
- 1086 **Brozzoli C, Pavani F, Urquizar C, Cardinali L, Farnè A.** Grasping actions remap peripersonal space.  
1087 *Neuroreport* 20: 913–917, 2009.
- 1088 **Buneo CA, Andersen RA.** Integration of target and hand position signals in the posterior parietal  
1089 cortex: effects of workspace and hand vision. *J Neurophysiol* 108: 187–199, 2012.
- 1090 **Buneo CA, Jarvis MR, Batista AP, Andersen RA.** Direct visuomotor transformations for reaching.  
1091 *Nature* 416: 632–636, 2002.
- 1092 **Caggiano V, Fogassi L, Rizzolatti G, Thier P, Casile A.** Mirror neurons differentially encode the  
1093 peripersonal and extrapersonal space of monkeys. *Science* 324: 403–406, 2009.
- 1094 **Calapai A, Berger M, Niessing M, Heisig K, Brockhausen R, Treue S, Gail A.** A cage-based training,  
1095 cognitive testing and enrichment system optimized for rhesus macaques in neuroscience research.  
1096 *Behav Res Methods* 49: 35–45, 2017.
- 1097 **Capogrosso M, Milekovic T, Borton DA, Wagner F, Moraud EM, Mignardot JB, Buse N, Gandar J,  
1098 Barraud Q, Xing D, Rey E, Duis S, Jianzhong Y, Ko WKD, Li Q, Detemple P, Denison T, Micera S,  
1099 Bezard E, Bloch J, Courtine G.** A brain-spine interface alleviating gait deficits after spinal cord injury  
1100 in primates. *Nature* 539: 284–288, 2016.
- 1101 **Carmena JM.** Advances in Neuroprosthetic Learning and Control. *PLoS Biol* 11: e1001561, 2013.
- 1102 **Chen X, Davis J.** Camera Placement Considering Occlusion for Robust Motion Capture. *Comput*  
1103 *Graph Lab Stanford Univ Tech Rep* 2: 2, 2000.
- 1104 **Cheney PD, Fetz EE.** Functional classes of primate corticomotoneuronal cells and their relation to  
1105 active force. *J Neurophysiol* 44: 773–791, 1980.

- 1106 **Chestek CA, Gilja V, Nuyujukian P, Kier RJ, Solzbacher F, Ryu SI, Harrison RR, Shenoy KV.** HermesC:  
1107 Low-Power Wireless Neural Recording System for Freely Moving Primates. *IEEE Trans Neural Syst*  
1108 *Rehabil Eng* 17: 330–338, 2009.
- 1109 **Christopoulos V, Bonaiuto J, Kagan I, Andersen RA.** Inactivation of Parietal Reach Region Affects  
1110 Reaching But Not Saccade Choices in Internally Guided Decisions. *J Neurosci* 35: 11719–11728, 2015.
- 1111 **Cisek P.** Making decisions through a distributed consensus. *Curr Opin Neurobiol* 22: 927–936, 2012.
- 1112 **Colby CL, Goldberg ME.** Space and Attention in Parietal Cortex. *Annu Rev Neurosci* 22: 319–349,  
1113 1999.
- 1114 **Collinger JL, Wodlinger B, Downey JE, Wang W, Tyler-Kabara EC, Weber DJ, McMorland AJC,**  
1115 **Velliste M, Boninger ML, Schwartz AB.** High-performance neuroprosthetic control by an individual  
1116 with tetraplegia. *Lancet* 381: 557–564, 2013.
- 1117 **Courellis HS, Nummela SU, Metke M, Diehl GW, Bussell R, Cauwenberghs G, Miller CT.** Spatial  
1118 encoding in primate hippocampus during free navigation. *PLOS Biol* 17: e3000546, 2019.
- 1119 **Courtine G, Roy RR, Hodgson J, McKay H, Raven J, Zhong H, Yang H, Tuszynski MH, Edgerton VR.**  
1120 Kinematic and EMG Determinants in Quadrupedal Locomotion of a Non-Human Primate (Rhesus). *J*  
1121 *Neurophysiol* 93: 3127–3145, 2005.
- 1122 **Crammond DJ, Kalaska JF.** Modulation of preparatory neuronal activity in dorsal premotor cortex  
1123 due to stimulus-response compatibility. *J Neurophysiol* 71: 1281–1284, 1994.
- 1124 **Crammond DJ, Kalaska JF.** Prior information in motor and premotor cortex: activity during the delay  
1125 period and effect on pre-movement activity. *J Neurophysiol* 84: 986–1005, 2000.
- 1126 **Dann B, Michaels JA, Schaffelhofer S, Scherberger H.** Uniting functional network topology and  
1127 oscillations in the fronto-parietal single unit network of behaving primates. *Elife* 5, 2016.
- 1128 **Donchin O, Gribova A, Steinberg O, Bergman H, Vaadia E.** Primary motor cortex is involved in  
1129 bimanual coordination. *Nature* 395: 274–278, 1998.
- 1130 **Farnè A, Serino A, van der Stoep N, Spence C, Di Luca M.** Depth: The forgotten dimension. *Multisens*  
1131 *Res* 29: 1–32, 2016.
- 1132 **Fernandez-Leon JA, Parajuli A, Franklin R, Sorenson M, Felleman DJ, Hansen BJ, Hu M, Dragoi V.** A  
1133 wireless transmission neural interface system for unconstrained non-human primates. *J Neural Eng*  
1134 12: 056005, 2015.
- 1135 **Foster JD, Nuyujukian P, Freifeld O, Gao H, Walker RM, Ryu SI, Meng TH, Murmann B, Black MJ,**  
1136 **Shenoy K V.** A freely-moving monkey treadmill model. *J Neural Eng* 11: 046020, 2014.
- 1137 **Gail A, Andersen RA.** Neural Dynamics in Monkey Parietal Reach Region Reflect Context-Specific  
1138 Sensorimotor Transformations. *J Neurosci* 26: 9376–9384, 2006.
- 1139 **Georgopoulos AP, Schwartz AB, Kettner RE.** Neuronal population coding of movement direction.  
1140 *Science* 233: 1416–1419, 1986.
- 1141 **Giglia G, Pia L, Folegatti A, Puma A, Fierro B, Cosentino G, Berti A, Brighina F.** Far space remapping  
1142 by tool use: A rTMS study over the right posterior parietal cortex. *Brain Stimul* 8: 795–800, 2015.
- 1143 **Gilja V, Chestek CA, Nuyujukian P, Foster JD, Shenoy K V.** Autonomous head-mounted  
1144 electrophysiology systems for freely behaving primates. *Curr Opin Neurobiol* 20: 676–686, 2010.

- 1145 **Gilja V, Pandarinath C, Blabe CH, Nuyujukian P, Simeral JD, Sarma AA, Sorice BL, Perge JA,**  
1146 **Jarosiewicz B, Hochberg LR, Shenoy K V., Henderson JM.** Clinical translation of a high-performance  
1147 neural prosthesis. *Nat Med* 21: 1142–1145, 2015.
- 1148 **Graziano MS, Hu XT, Gross CG.** Visuospatial properties of ventral premotor cortex. *J Neurophysiol*  
1149 77: 2268–2292, 1997.
- 1150 **Graziano MSA, Cooke DF, Taylor CSR.** Coding the location of the arm by sight. *Science* 290: 1782–  
1151 1786, 2000.
- 1152 **Hage SR, Jurgens U.** On the Role of the Pontine Brainstem in Vocal Pattern Generation: A Telemetric  
1153 Single-Unit Recording Study in the Squirrel Monkey. *J Neurosci* 26: 7105–7115, 2006.
- 1154 **Halligan PW, Marshall JC.** Left neglect for near but not far space in man. *Nature* 350: 498–500, 1991.
- 1155 **Hauschild M, Mulliken GH, Fineman I, Loeb GE, Andersen RA.** Cognitive signals for brain-machine  
1156 interfaces in posterior parietal cortex include continuous 3D trajectory commands. *Proc Natl Acad*  
1157 *Sci* 109: 17075–17080, 2012.
- 1158 **Hazama Y, Tamura R.** Effects of self-locomotion on the activity of place cells in the hippocampus of a  
1159 freely behaving monkey. *Neurosci Lett* 701: 32–37, 2019.
- 1160 **Hochberg LR, Bacher D, Jarosiewicz B, Masse NY, Simeral JD, Vogel J, Haddadin S, Liu J, Cash SS,**  
1161 **Van Der Smagt P, Donoghue JP.** Reach and grasp by people with tetraplegia using a neurally  
1162 controlled robotic arm. *Nature* 485: 372–375, 2012.
- 1163 **Holmes NP.** Does tool use extend peripersonal space? A review and re-analysis. *Exp Brain Res* 218:  
1164 273–282, 2012.
- 1165 **Hwang EJ, Hauschild M, Wilke M, Andersen RA.** Inactivation of the Parietal Reach Region Causes  
1166 Optic Ataxia, Impairing Reaches but Not Saccades. *Neuron* 76: 1021–1029, 2012.
- 1167 **Iriki A, Tanaka M, Iwamura Y.** Coding of modified body schema during tool use by macaque  
1168 postcentral neurones. *Neuroreport* 7: 2325–2330, 1996.
- 1169 **Jackson A, Mavoori J, Fetz EE.** Long-term motor cortex plasticity induced by an electronic neural  
1170 implant. *Nature* 444: 56–60, 2006.
- 1171 **Jackson A, Mavoori J, Fetz EE.** Correlations Between the Same Motor Cortex Cells and Arm Muscles  
1172 During a Trained Task, Free Behavior, and Natural Sleep in the Macaque Monkey. *J Neurophysiol* 97:  
1173 360–374, 2007.
- 1174 **Kaufman MT, Churchland MM, Shenoy K V.** The roles of monkey M1 neuron classes in movement  
1175 preparation and execution. *J Neurophysiol* 110: 817–825, 2013.
- 1176 **Klaes C, Westendorff S, Chakrabarti S, Gail A.** Choosing Goals, Not Rules: Deciding among Rule-  
1177 Based Action Plans. *Neuron* 70: 536–548, 2011.
- 1178 **Kuang S, Morel P, Gail A.** Planning movements in visual and physical space in monkey posterior  
1179 parietal cortex. *Cereb Cortex* 26: 731–747, 2016.
- 1180 **Libey T, Fetz EE.** Open-source, low cost, free-behavior monitoring, and reward system for  
1181 neuroscience research in non-human primates. *Front Neurosci* 11: 265, 2017.
- 1182 **Ludvig N, Tang HM, Gohil BC, Botero JM.** Detecting location-specific neuronal firing rate increases in  
1183 the hippocampus of freely-moving monkeys. *Brain Res* 1014: 97–109, 2004.



- 1184 **Maravita A, Iriki A.** Tools for the body (schema). *Trends Cogn Sci* 8: 79–86, 2004.
- 1185 **Maravita A, Spence C, Driver J.** Multisensory integration and the body schema: Close to hand and  
1186 within reach. *Curr Biol* 13: R531–R539, 2003.
- 1187 **Maravita A, Spence C, Kennett S, Driver J.** Tool-use changes multimodal spatial interactions  
1188 between vision and touch in normal humans. *Cognition* 83: B25–B34, 2002.
- 1189 **Martínez-Vázquez P, Gail A.** Directed Interaction Between Monkey Premotor and Posterior Parietal  
1190 Cortex During Motor-Goal Retrieval from Working Memory. *Cereb Cortex* 28: 1866–1881, 2018.
- 1191 **Mathis A, Mamidanna P, Cury KM, Abe T, Murthy VN, Mathis MW, Bethge M.** DeepLabCut:  
1192 markerless pose estimation of user-defined body parts with deep learning. *Nat Neurosci* 21: 1281–  
1193 1289, 2018.
- 1194 **Moeslund TB, Hilton A, Krüger V.** A survey of advances in vision-based human motion capture and  
1195 analysis. *Comput. Vis. Image Underst.* 104: 90–126, 2006.
- 1196 **Mooshagian E, Snyder LH.** Spatial eye–hand coordination during bimanual reaching is not  
1197 systematically coded in either LIP or PRR. *Proc Natl Acad Sci* 115: E3817–E3826, 2018.
- 1198 **Mooshagian E, Wang C, Holmes CD, Snyder LH.** Single Units in the Posterior Parietal Cortex Encode  
1199 Patterns of Bimanual Coordination. *Cereb Cortex* 28: 1549–1567, 2018.
- 1200 **Morel P.** Gramm: Grammar of graphics plotting in Matlab. *J Open Source Softw* 3: 568, 2018.
- 1201 **Morel P, Ferrea E, Taghizadeh-Sarshouri B, Audí JMC, Ruff R, Hoffmann K-P, Lewis S, Russold M,**  
1202 **Dietl H, Abu-Saleh L, Schroeder D, Krautschneider W, Meiners T, Gail A.** Long-term decoding of  
1203 movement force and direction with a wireless myoelectric implant. *J Neural Eng* 13: 016002, 2015.
- 1204 **Mulliken GH, Musallam S, Andersen RA.** Forward estimation of movement state in posterior parietal  
1205 cortex. *Proc Natl Acad Sci U S A* 105: 8170–7, 2008.
- 1206 **Musallam S, Corneil BD, Greger B, Scherberger H, Andersen RA.** Cognitive control signals for neural  
1207 prosthetics. *Science* 305: 258–262, 2004.
- 1208 **Musial PG, Baker SN, Gerstein GL, King EA, Keating JG.** Signal-to-noise ratio improvement in  
1209 multiple electrode recording. *J Neurosci Methods* 115: 29–43, 2002.
- 1210 **Nakamura T, Matsumoto J, Nishimaru H, Bretas RV, Takamura Y, Hori E, Ono T, Nishijo H.** A  
1211 markerless 3D computerized motion capture system incorporating a skeleton model for monkeys.  
1212 *PLoS One* 11: e0166154, 2016.
- 1213 **Nath T, Mathis A, Chen AC, Patel A, Bethge M, Mathis MW.** Using DeepLabCut for 3D markerless  
1214 pose estimation across species and behaviors. *Nat Protoc* 14: 2152–2176, 2019.
- 1215 **Niebergall R, Khayat PS, Treue S, Martinez-Trujillo JC.** Multifocal attention filters targets from  
1216 distracters within and beyond primate mt neurons’ receptive field boundaries. *Neuron* 72: 1067–  
1217 1079, 2011.
- 1218 **Nummela SU, Jovanovic V, de la Mothe L, Miller CT.** Social Context-Dependent Activity in Marmoset  
1219 Frontal Cortex Populations during Natural Conversations. *J Neurosci* 37: 7036–7047, 2017.
- 1220 **Orsborn AL, Moorman HG, Overduin SA, Shanechi MM, Dimitrov DF, Carmena JM.** Closed-Loop  
1221 Decoder Adaptation Shapes Neural Plasticity for Skillful Neuroprosthetic Control. *Neuron* 82: 1380–  
1222 1393, 2014.

- 1223 **Pavani F, Spence C, Driver J.** Visual capture of touch: Out-of-the-body experiences with rubber  
1224 gloves. *Psychol Sci* 11: 353–359, 2000.
- 1225 **Peikon ID, Fitzsimmons NA, Lebedev MA, Nicolelis MAL.** Three-dimensional, automated, real-time  
1226 video system for tracking limb motion in brain-machine interface studies. *J Neurosci Methods* 180:  
1227 224–233, 2009.
- 1228 **Pesaran B, Nelson MJ, Andersen RA.** Dorsal Premotor Neurons Encode the Relative Position of the  
1229 Hand, Eye, and Goal during Reach Planning. *Neuron* 51: 125–134, 2006.
- 1230 **Ponce CR, Genecin MP, Perez-Melara G, Livingstone MS.** Automated chair-training of rhesus  
1231 macaques. *J Neurosci Methods* 263: 75–80, 2016.
- 1232 **Rajangam S, Tseng PH, Yin A, Lehew G, Schwarz DA, Lebedev MA, Nicolelis MAL.** Wireless cortical  
1233 brain-machine interface for whole-body navigation in primates. *Sci Rep* 6: 22170, 2016.
- 1234 **Rizzolatti G, Fadiga L, Fogassi L, Gallese V.** The space around us. *Science* 277: 190–191, 1997.
- 1235 **Rizzolatti G, Scandolara C, Matelli M, Gentilucci M.** Afferent properties of periarculate neurons in  
1236 macaque monkeys. II. Visual responses. *Behav Brain Res* 2: 147–163, 1981.
- 1237 **Roy S, Wang X.** Wireless multi-channel single unit recording in freely moving and vocalizing  
1238 primates. *J Neurosci Methods* 203: 28–40, 2012.
- 1239 **Santhanam G, Ryu SI, Yu BM, Afshar A, Shenoy K V.** A high-performance brain-computer interface.  
1240 *Nature* 442: 195–198, 2006.
- 1241 **Sayegh PF, Gorbet DJ, Hawkins KM, Hoffman KL, Sergio LE.** The Contribution of Different Cortical  
1242 Regions to the Control of Spatially Decoupled Eye–Hand Coordination. *J Cogn Neurosci* 29: 1194–  
1243 1211, 2017.
- 1244 **Schaffelhofer S, Agudelo-Toro A, Scherberger H.** Decoding a Wide Range of Hand Configurations  
1245 from Macaque Motor, Premotor, and Parietal Cortices. *J Neurosci* 35: 1068–1081, 2015.
- 1246 **Schwarz DA, Lebedev MA, Hanson TL, Dimitrov DF, Lehew G, Meloy J, Rajangam S, Subramanian V,  
1247 Ifft PJ, Li Z, Ramakrishnan A, Tate A, Zhuang KZ, Nicolelis MAL.** Chronic, wireless recordings of large-  
1248 scale brain activity in freely moving rhesus monkeys. *Nat Methods* 11: 670–676, 2014.
- 1249 **Serruya MD, Hatsopoulos NG, Paninski L, Fellows MR, Donoghue JP.** Brain-machine interface:  
1250 Instant neural control of a movement signal. *Nature* 416: 141–142, 2002.
- 1251 **Shahidi N, Schrater P, Wright T, Pitkow X, Dragoi V.** Population coding of strategic variables during  
1252 foraging in freely-moving macaques. *bioRxiv* 811992, 2019.
- 1253 **Sheshadri S, Dann B, Hueser T, Scherberger H.** 3D reconstruction toolbox for behavior tracked with  
1254 multiple cameras. *J Open Source Softw* 5: 1849, 2020.
- 1255 **Snyder LH, Batista AP, Andersen RA.** Change in motor plan, without a change in the spatial locus of  
1256 attention, modulates activity in posterior parietal cortex. [Online]. *J Neurophysiol* 79: 2814–9,  
1257 1998 <http://www.ncbi.nlm.nih.gov/pubmed/9582248> [21 Nov. 2013].
- 1258 **Suriya-Arunroj L, Gail A.** Complementary encoding of priors in monkey frontoparietal network  
1259 supports a dual process of decision-making. *Elife* 8: 1–21, 2019.
- 1260 **Talakoub O, Sayegh PF, Womelsdorf T, Zinke W, Fries P, Lewis CM, Hoffman KL.** Hippocampal and  
1261 neocortical oscillations are tuned to behavioral state in freely-behaving macaques. *bioRxiv* 552877,

- 1262 2019.
- 1263 **Taylor DM, Tillery SIH, Schwartz AB.** Direct cortical control of 3D neuroprosthetic devices. *Science*  
1264 296: 1829–1832, 2002.
- 1265 **Teikari P, Najjar RP, Malkki H, Knoblauch K, Dumortier D, Gronfier C, Cooper HM.** An inexpensive  
1266 Arduino-based LED stimulator system for vision research. *J Neurosci Methods* 211: 227–236, 2012.
- 1267 **Velliste M, Perel S, Spalding MC, Whitford AS, Schwartz AB.** Cortical control of a prosthetic arm for  
1268 self-feeding. *Nature* 453: 1098–1101, 2008.
- 1269 **Vuilleumier P, Valenza N, Mayer E, Reverdin A, Landis T.** Near and far visual space in unilateral  
1270 neglect. *Ann Neurol* 43: 406–410, 1998.
- 1271 **Wessberg J, Stambaugh CR, Kralik JD, Beck PD, Laubach M, Chapin JK, Kim J, Biggs SJ, Srinivasan**  
1272 **MA, Nicolelis MAL.** Real-time prediction of hand trajectory by ensembles of cortical neurons in  
1273 primates. *Nature* 408: 361–365, 2000.
- 1274 **Westendorff S, Klaes C, Gail A.** The Cortical Timeline for Deciding on Reach Motor Goals. *J Neurosci*  
1275 30: 5426–5436, 2010.
- 1276 **Wodlinger B, Downey JE, Tyler-Kabara EC, Schwartz AB, Boninger ML, Collinger JL.** Ten-dimensional  
1277 anthropomorphic arm control in a human brain-machine interface: Difficulties, solutions, and  
1278 limitations. *J Neural Eng* 12: 016011, 2014.
- 1279 **Wong YT, Fabiszak MM, Novikov Y, Daw ND, Pesaran B.** Coherent neuronal ensembles are rapidly  
1280 recruited when making a look-reach decision. *Nat Neurosci* 19: 327–334, 2016.
- 1281 **Xu W, de Carvalho F, Jackson A.** Sequential neural activity in primary motor cortex during sleep. *J*  
1282 *Neurosci* 39: 1408–18, 2019.
- 1283 **Yin M, Borton DA, Komar J, Agha NS, Lu Y, Li H, Laurens J, Lang Y, Li Q, Bull C, Larson L, Rosler D,**  
1284 **Bezard E, Courtine G, Nurmikko A V.** Wireless neurosensor for full-spectrum electrophysiology  
1285 recordings during free behavior. *Neuron* 84: 1170–1182, 2014.
- 1286 **Zanos S, Richardson AG, Shupe L, Miles FP, Fetz EE.** The neurochip-2: An autonomous head-fixed  
1287 computer for recording and stimulating in freely behaving monkeys. *IEEE Trans Neural Syst Rehabil*  
1288 *Eng* 19: 427–435, 2011.
- 1289 **Zhou A, Santacruz SR, Johnson BC, Alexandrov G, Moin A, Burghardt FL, Rabaey JM, Carmena JM,**  
1290 **Muller R.** A wireless and artefact-free 128-channel neuromodulation device for closed-loop  
1291 stimulation and recording in non-human primates. *Nat Biomed Eng* 3: 15–26, 2019.
- 1292

A

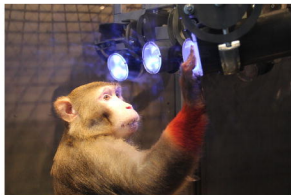

B

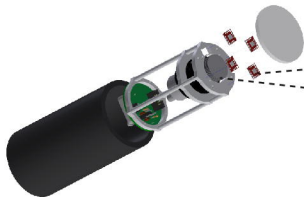

C

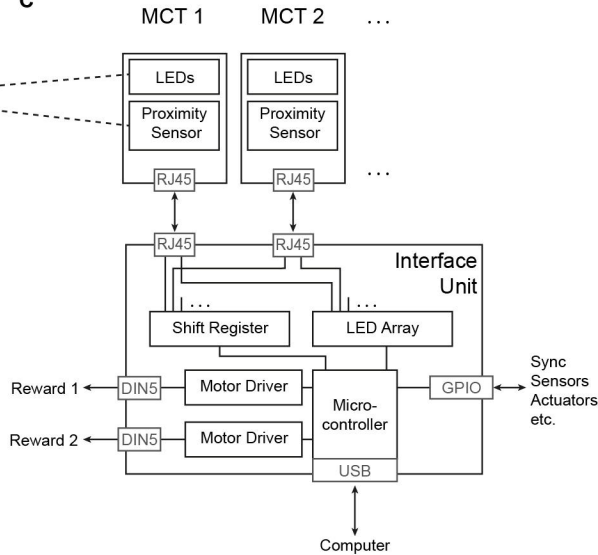

D

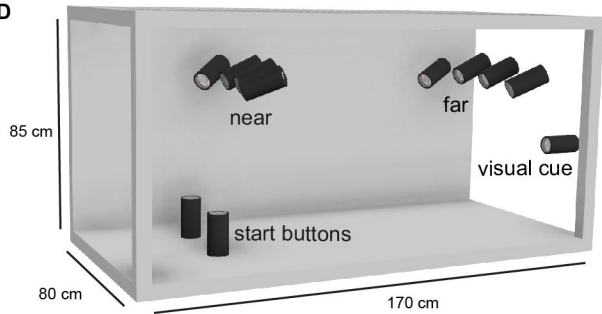



A

bioRxiv preprint doi: <https://doi.org/10.1101/305334>; this version posted March 5, 2020. The copyright holder for this preprint (which was not certified by peer review) is the author/funder, who has granted bioRxiv a license to display the preprint in perpetuity. It is made available under aCC-BY-NC-ND 4.0 International license.

hold starting position

indication of future reach target

memory phase

reach to target

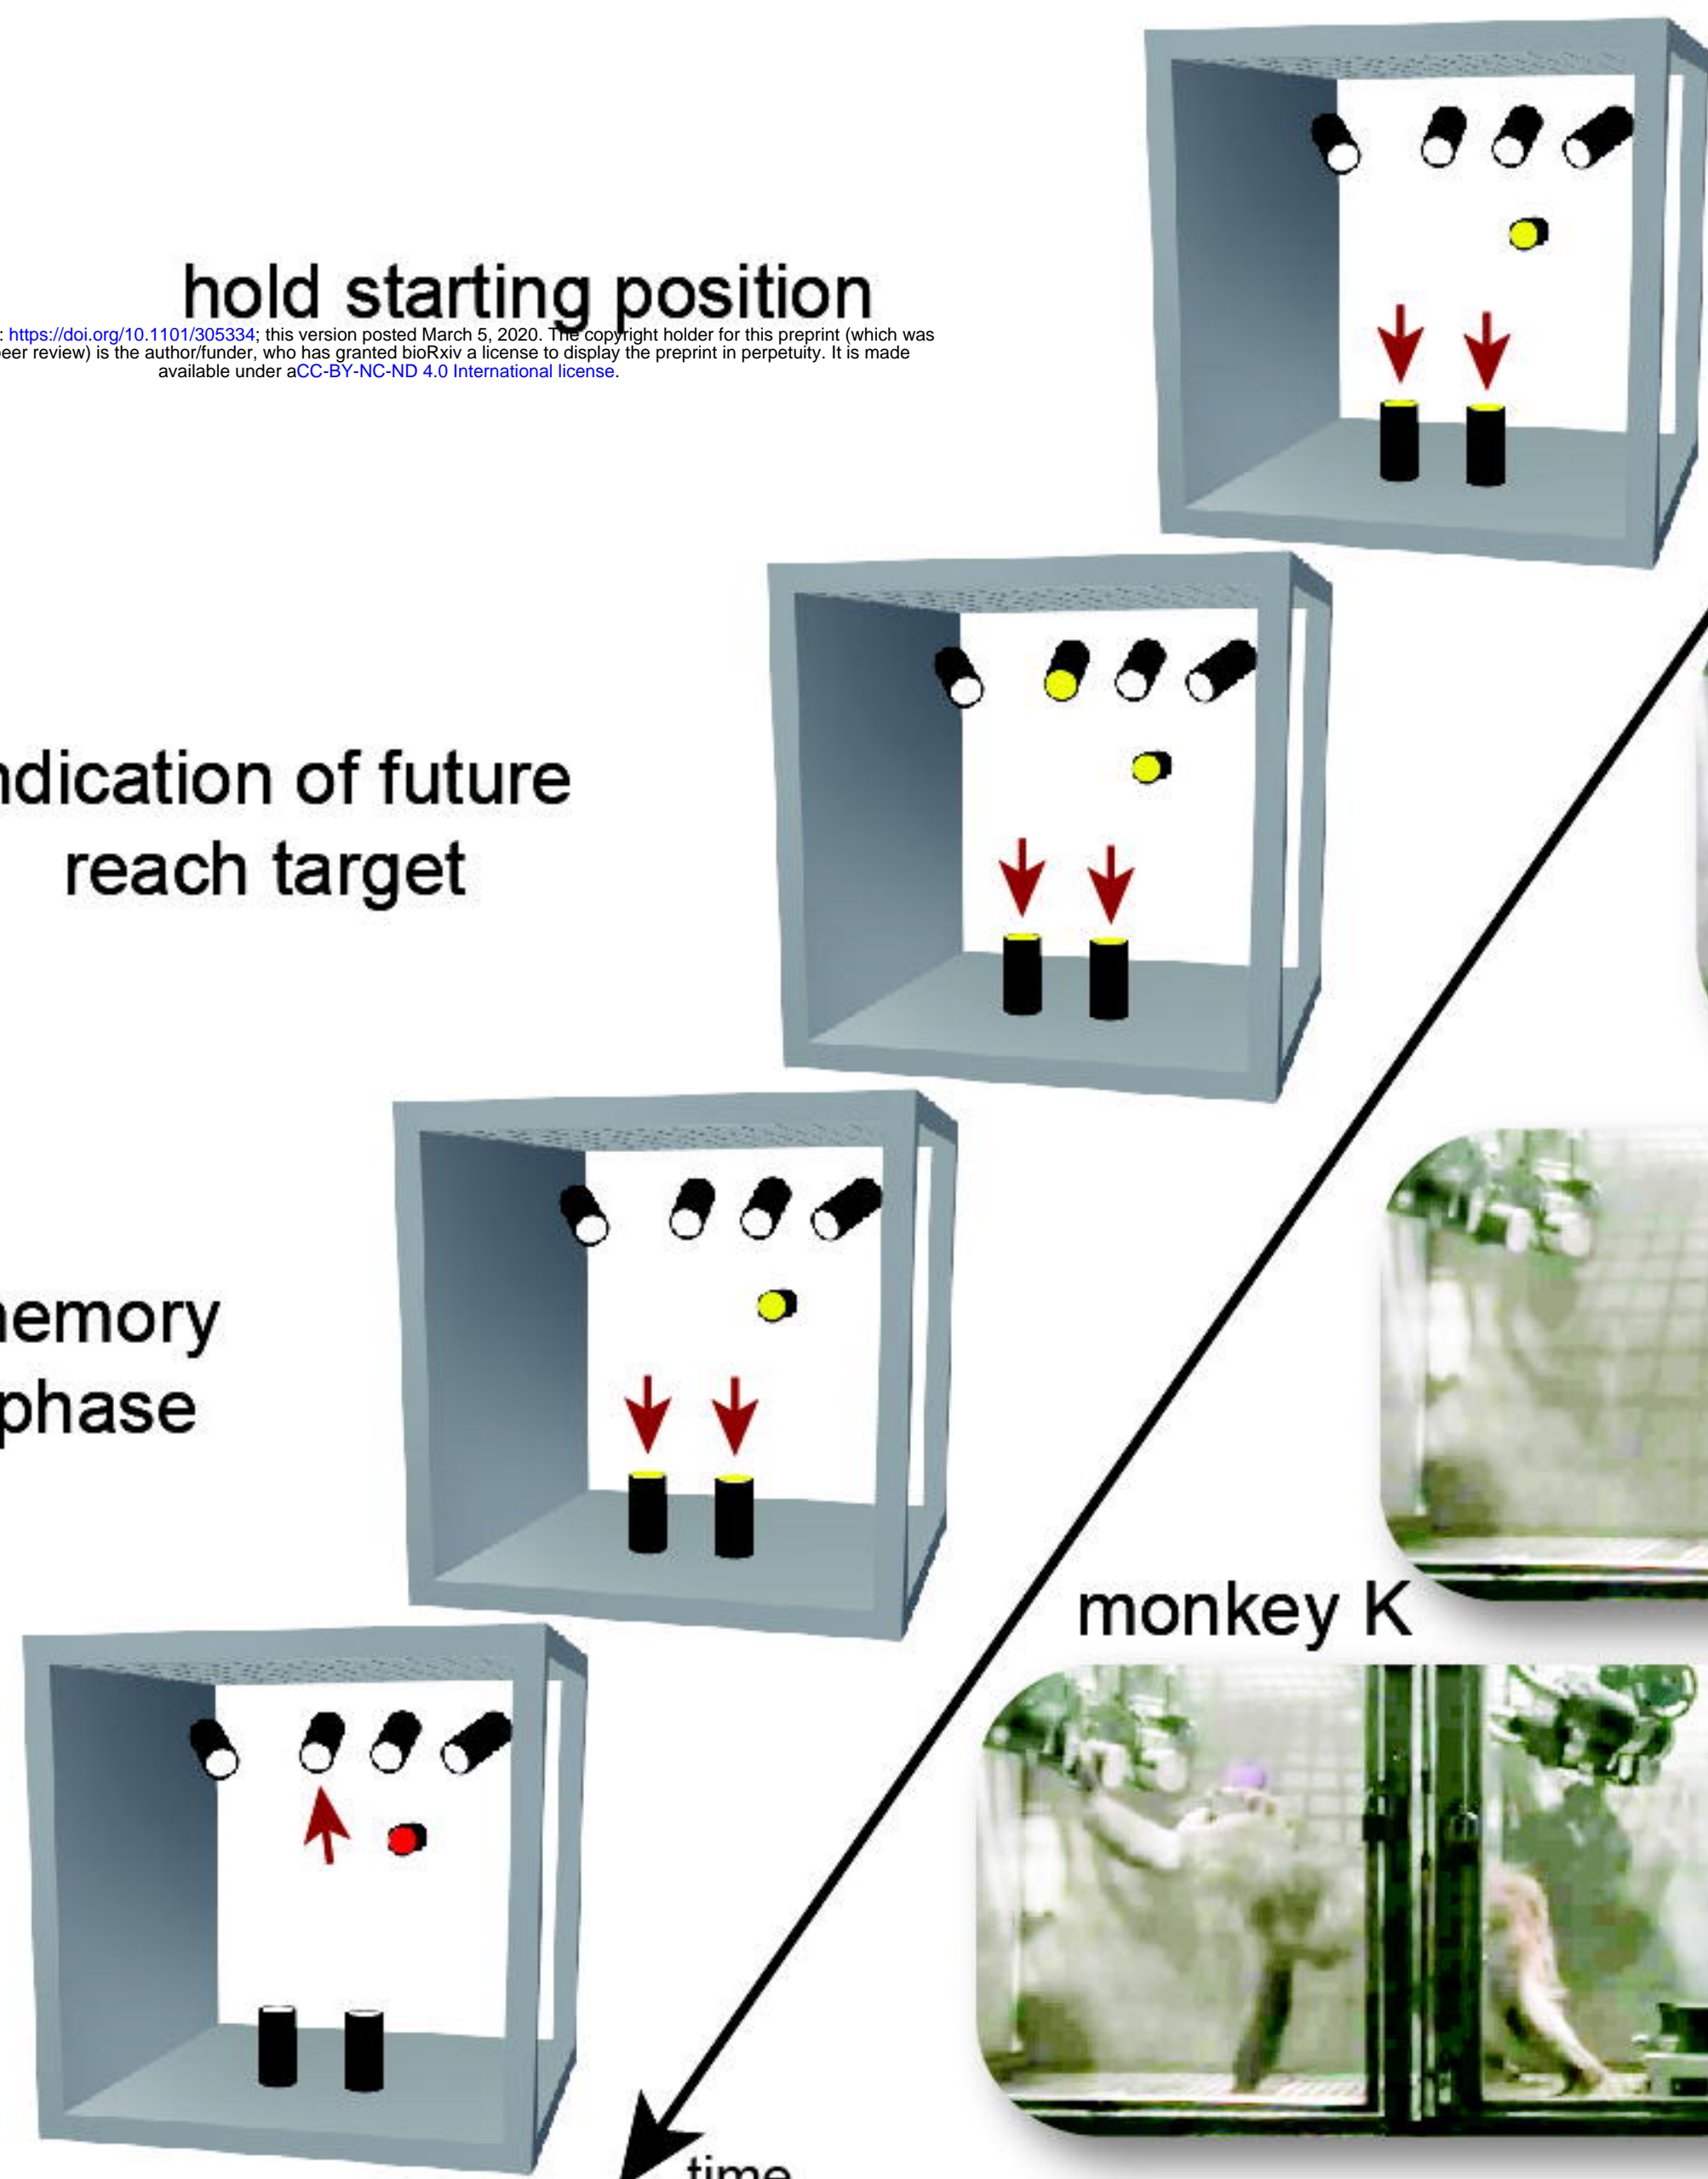

B

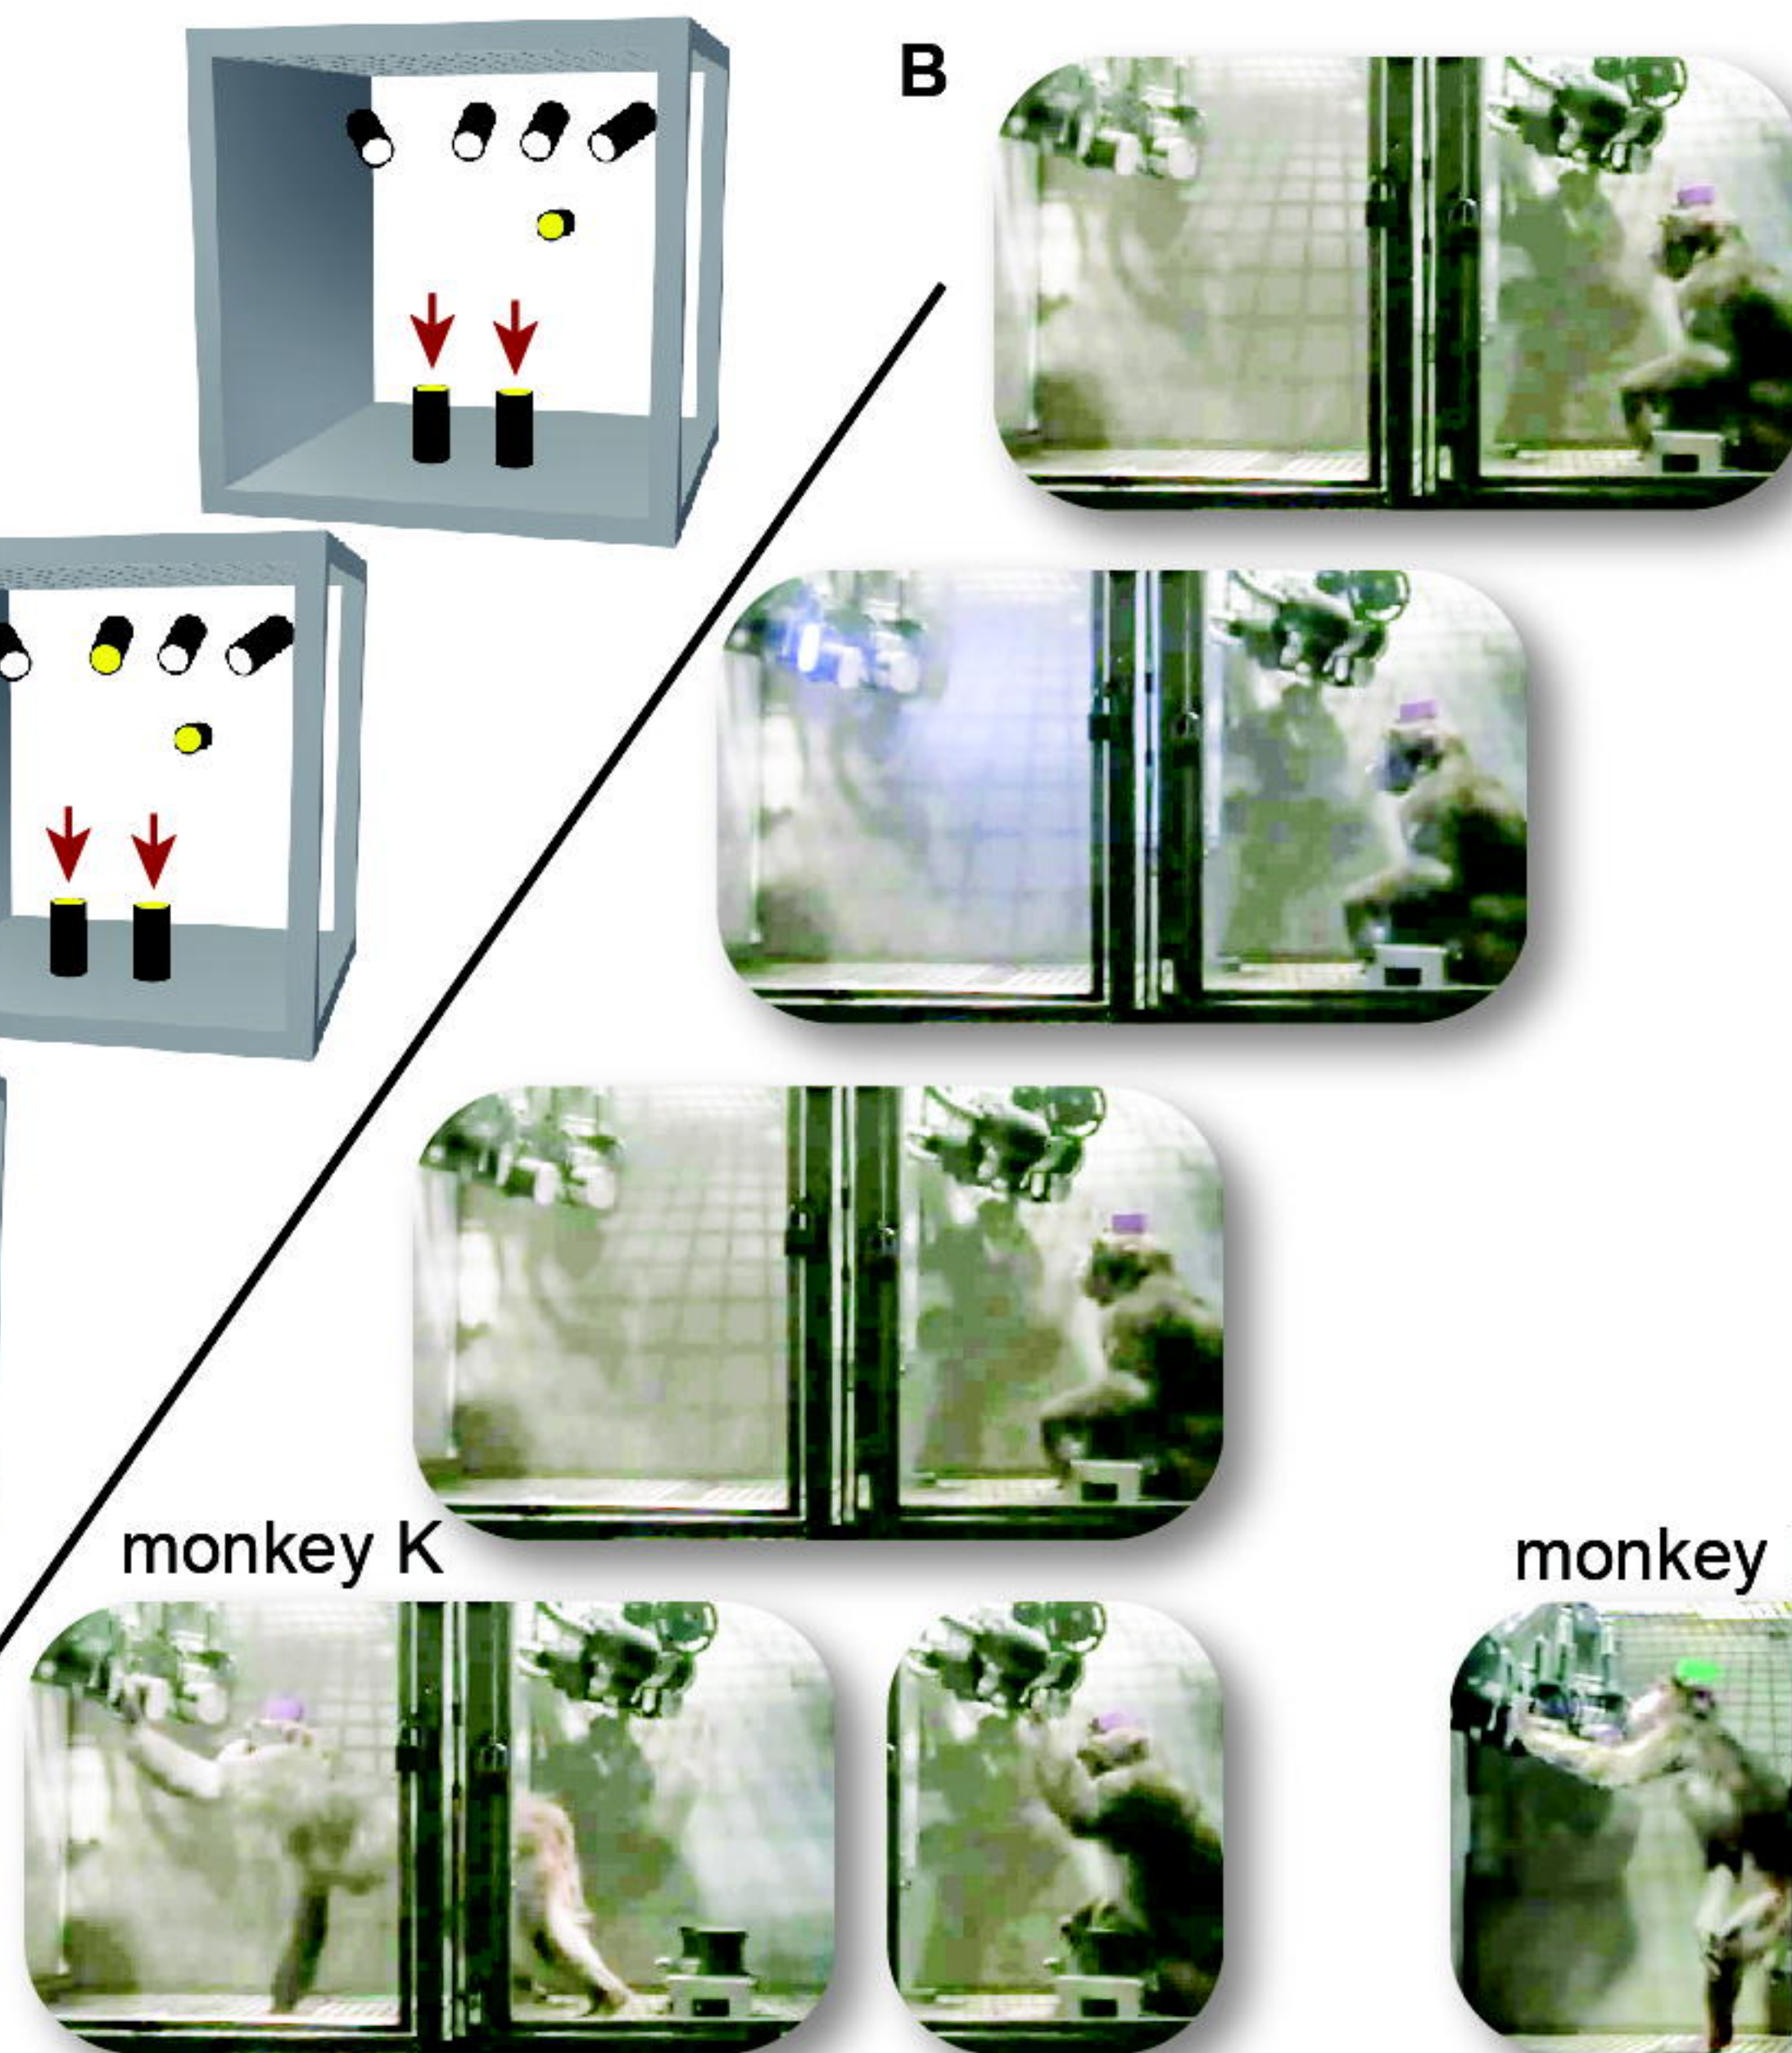

C

monkey K (19 Session)

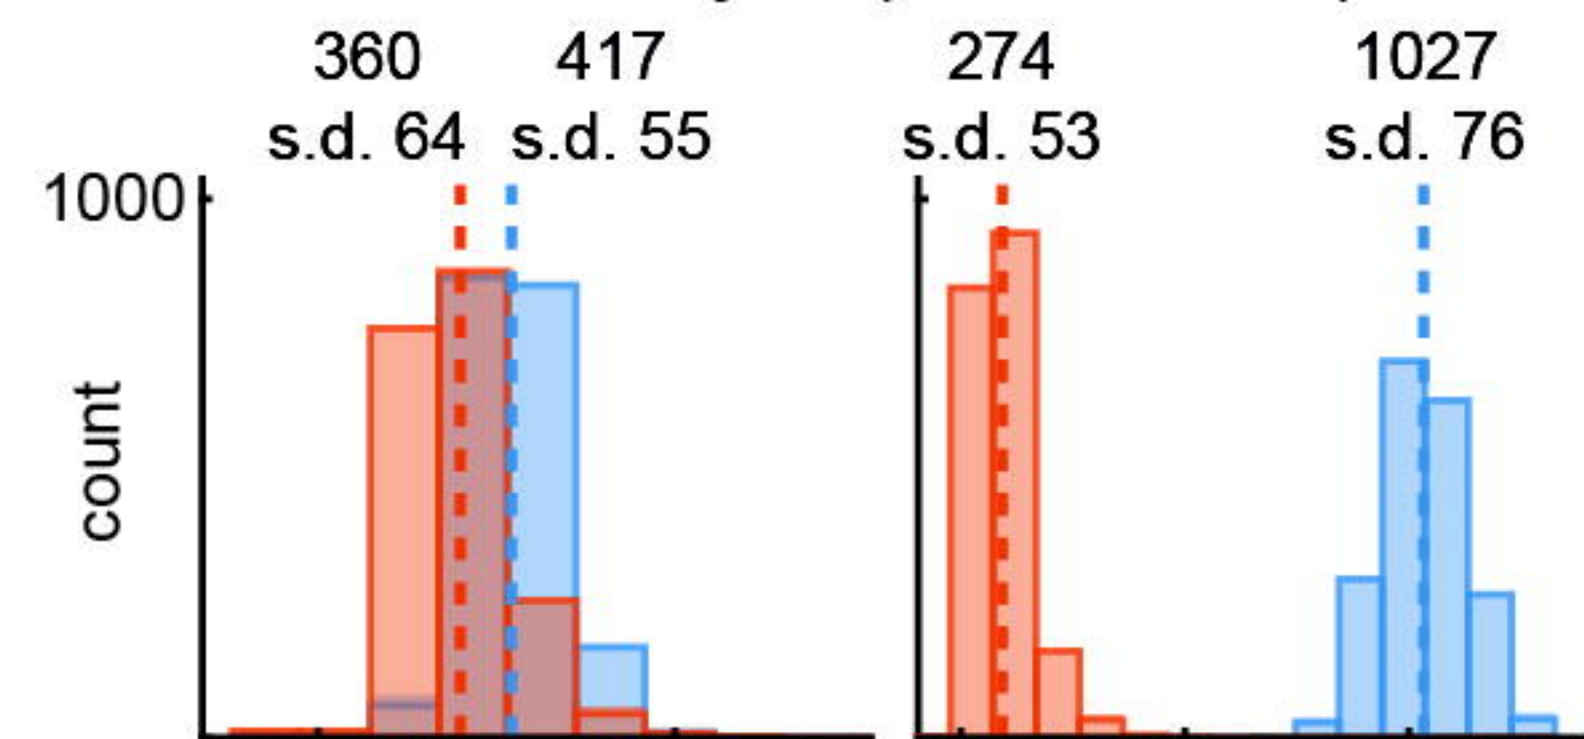

monkey L (10 Session)

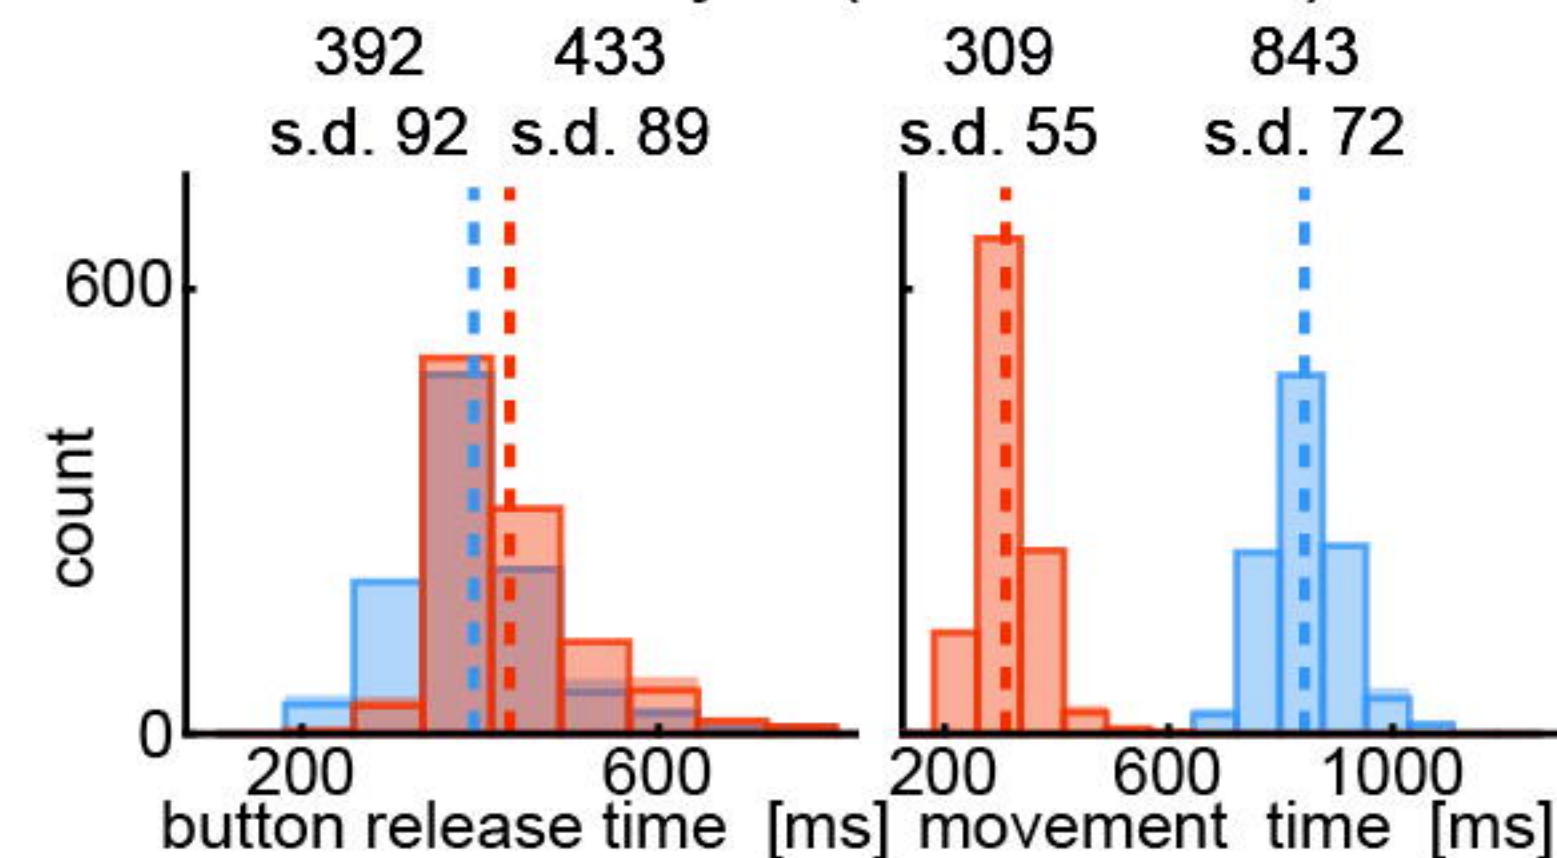

■ far  
■ near



**A**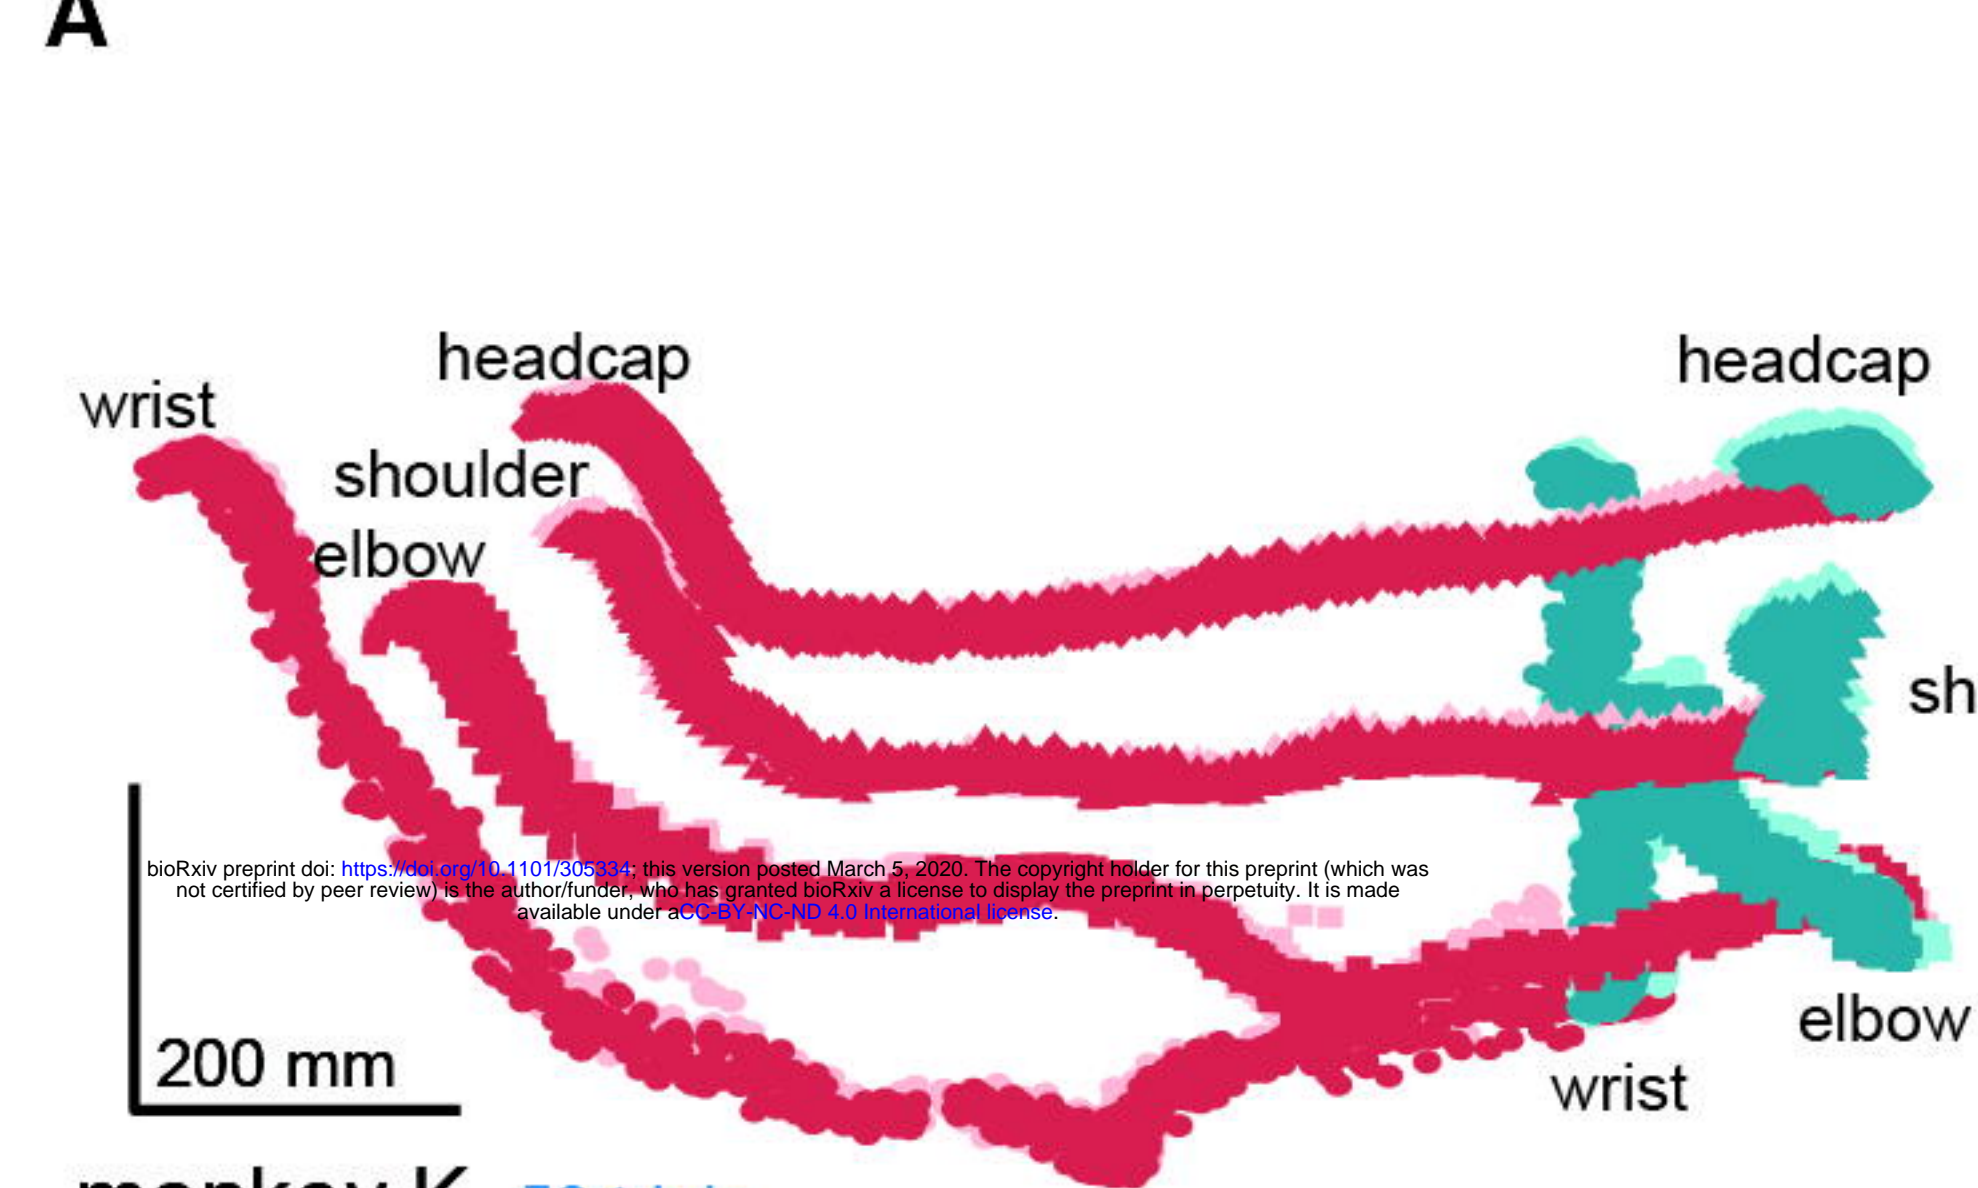

monkey K 59 trials  
60 trials

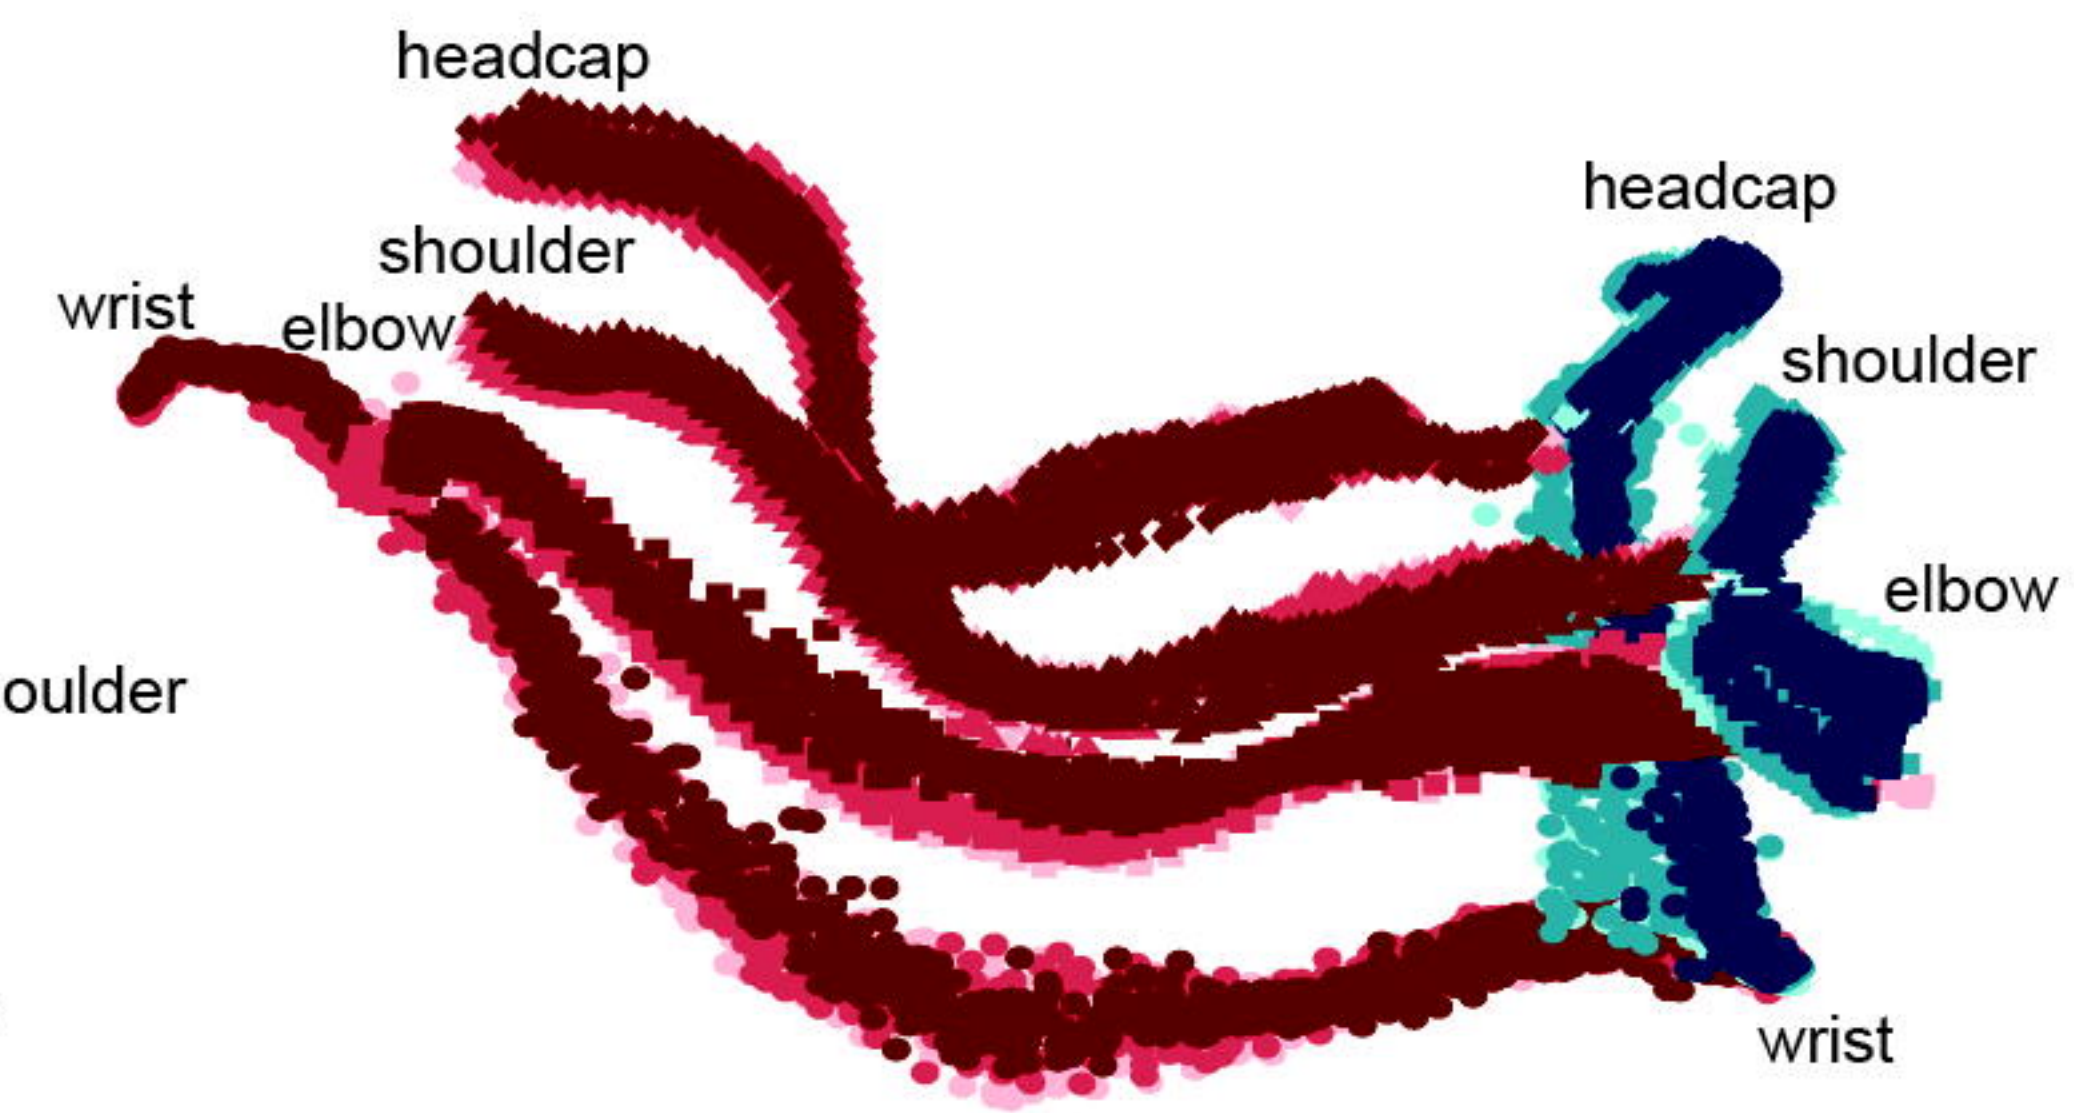

monkey L 107 trials  
110 trials

session 1 ■ ■ far  
session 2 ■ ■ near  
session 3 ■

**B**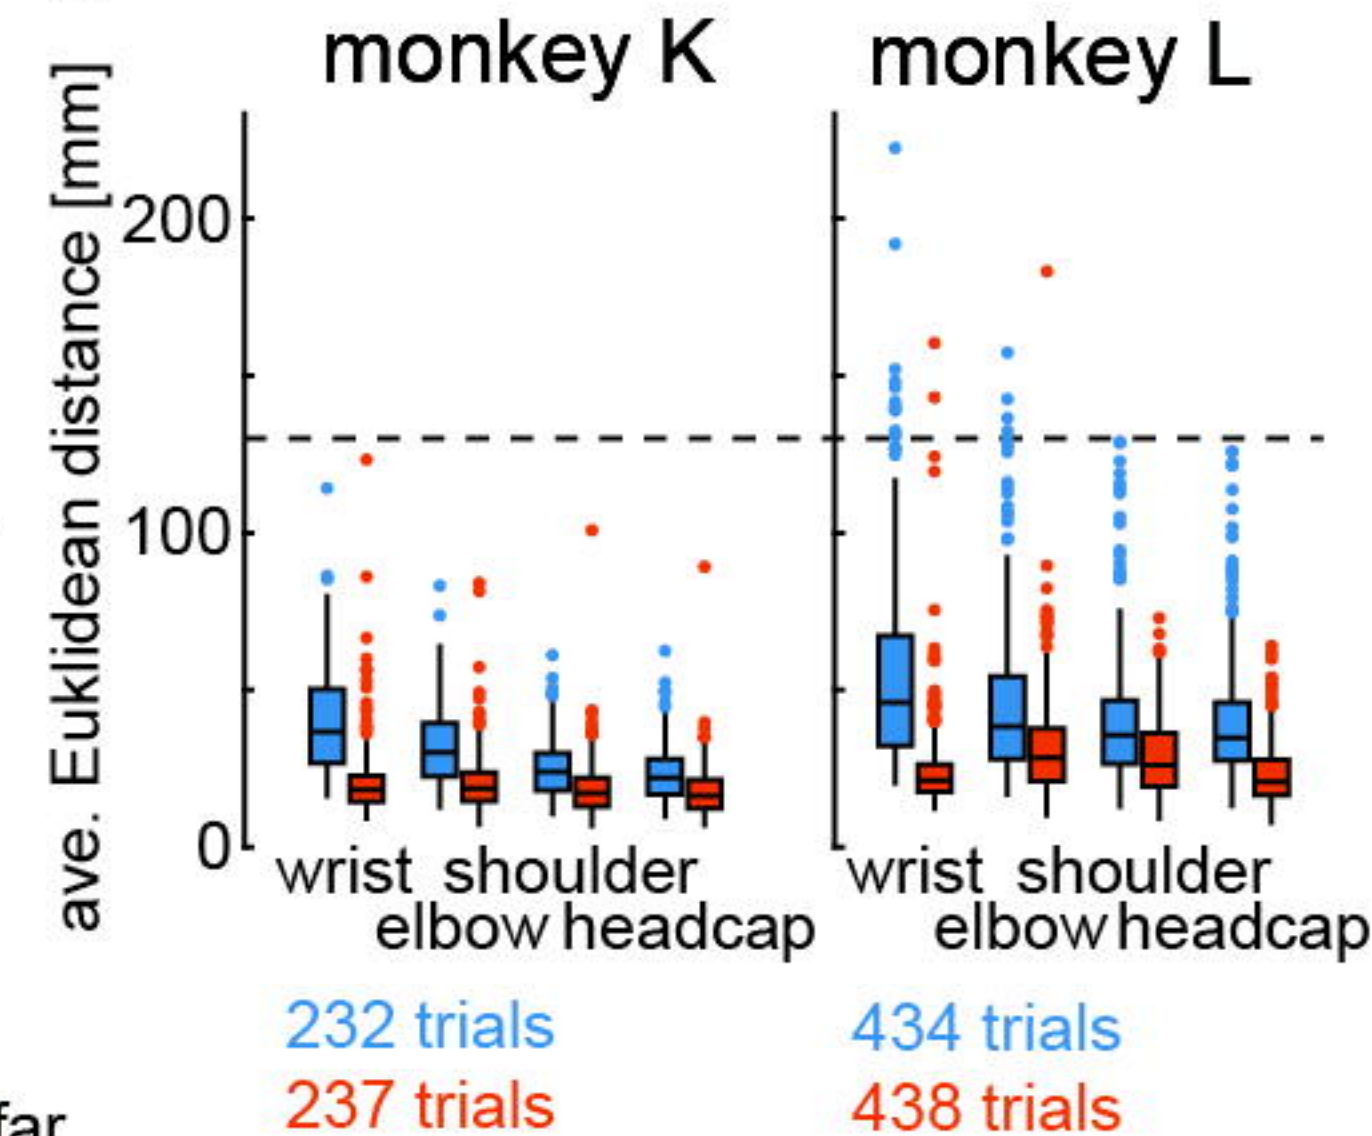**C**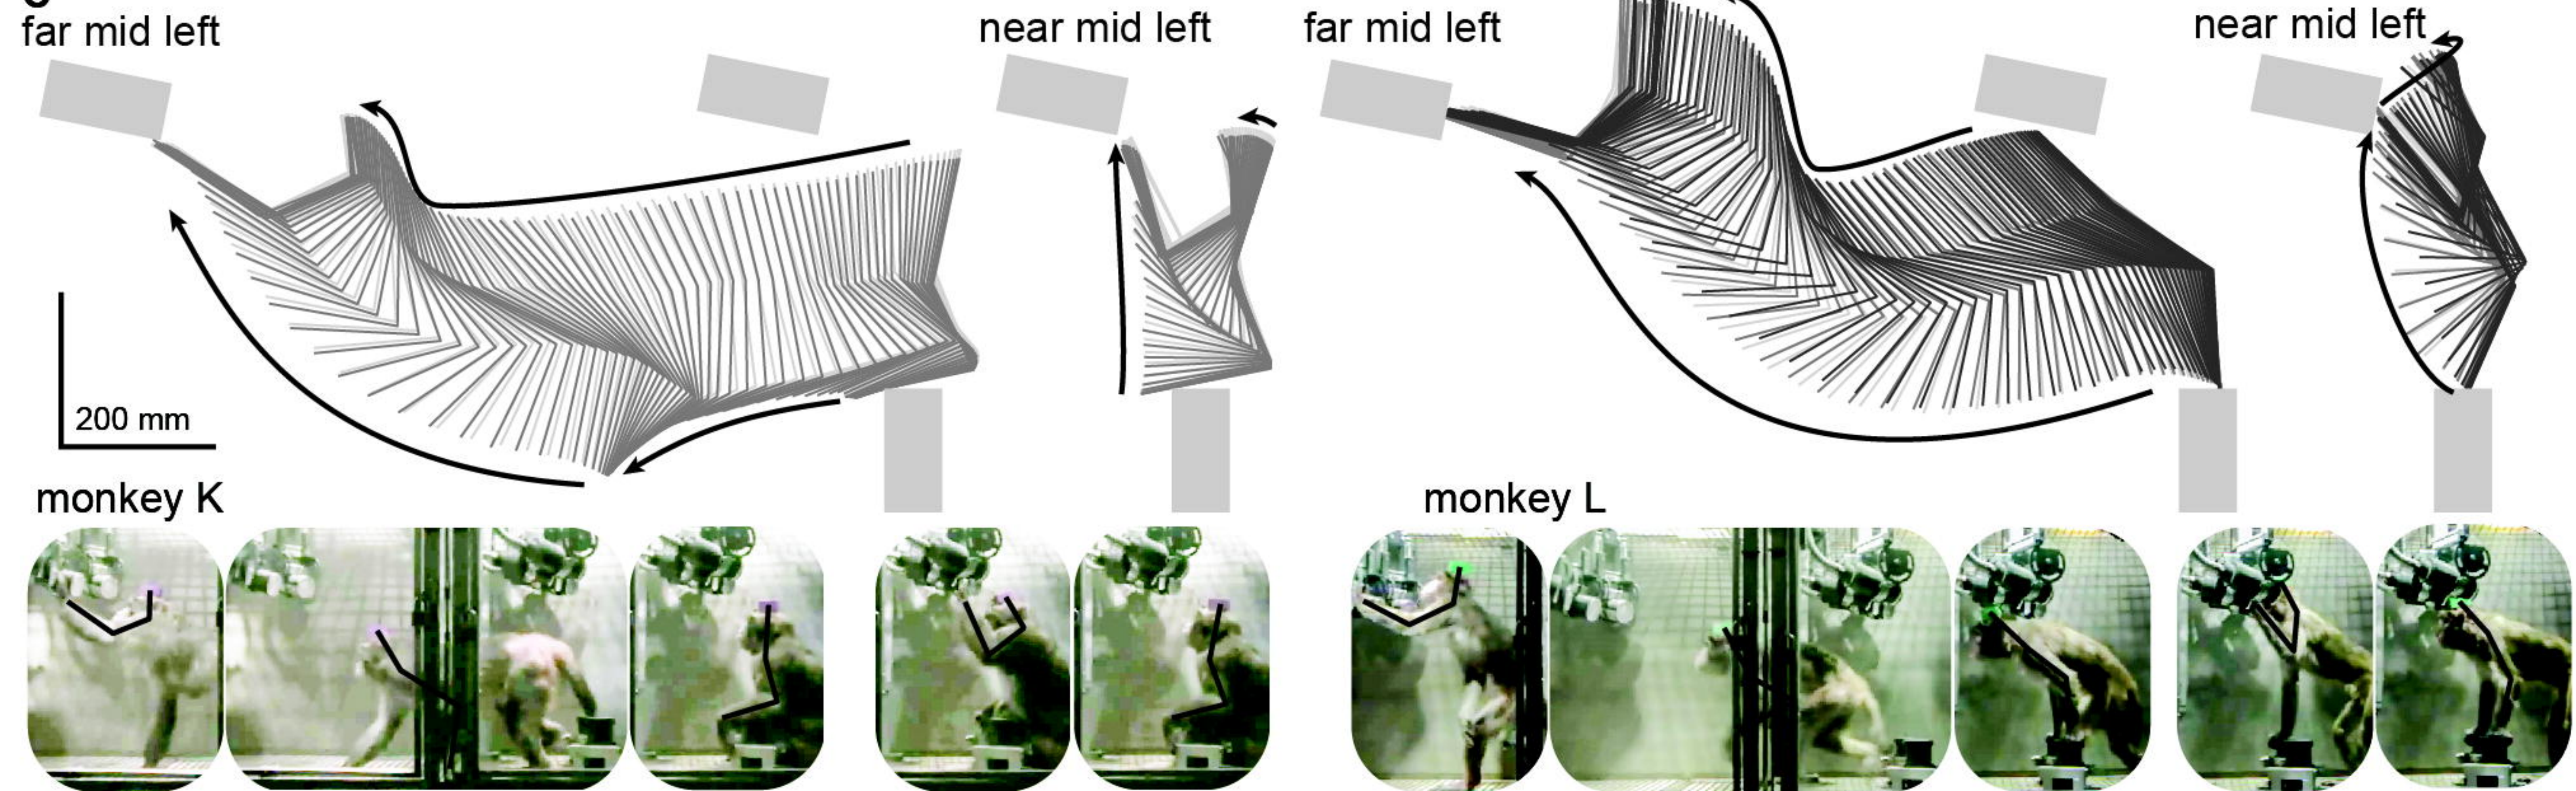



PRR M1 PMd

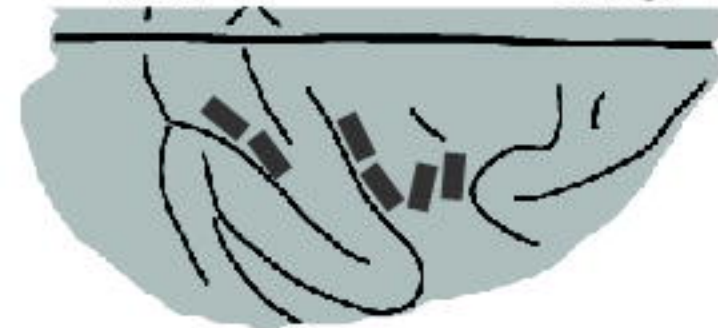

unit A - monkey K - PMd

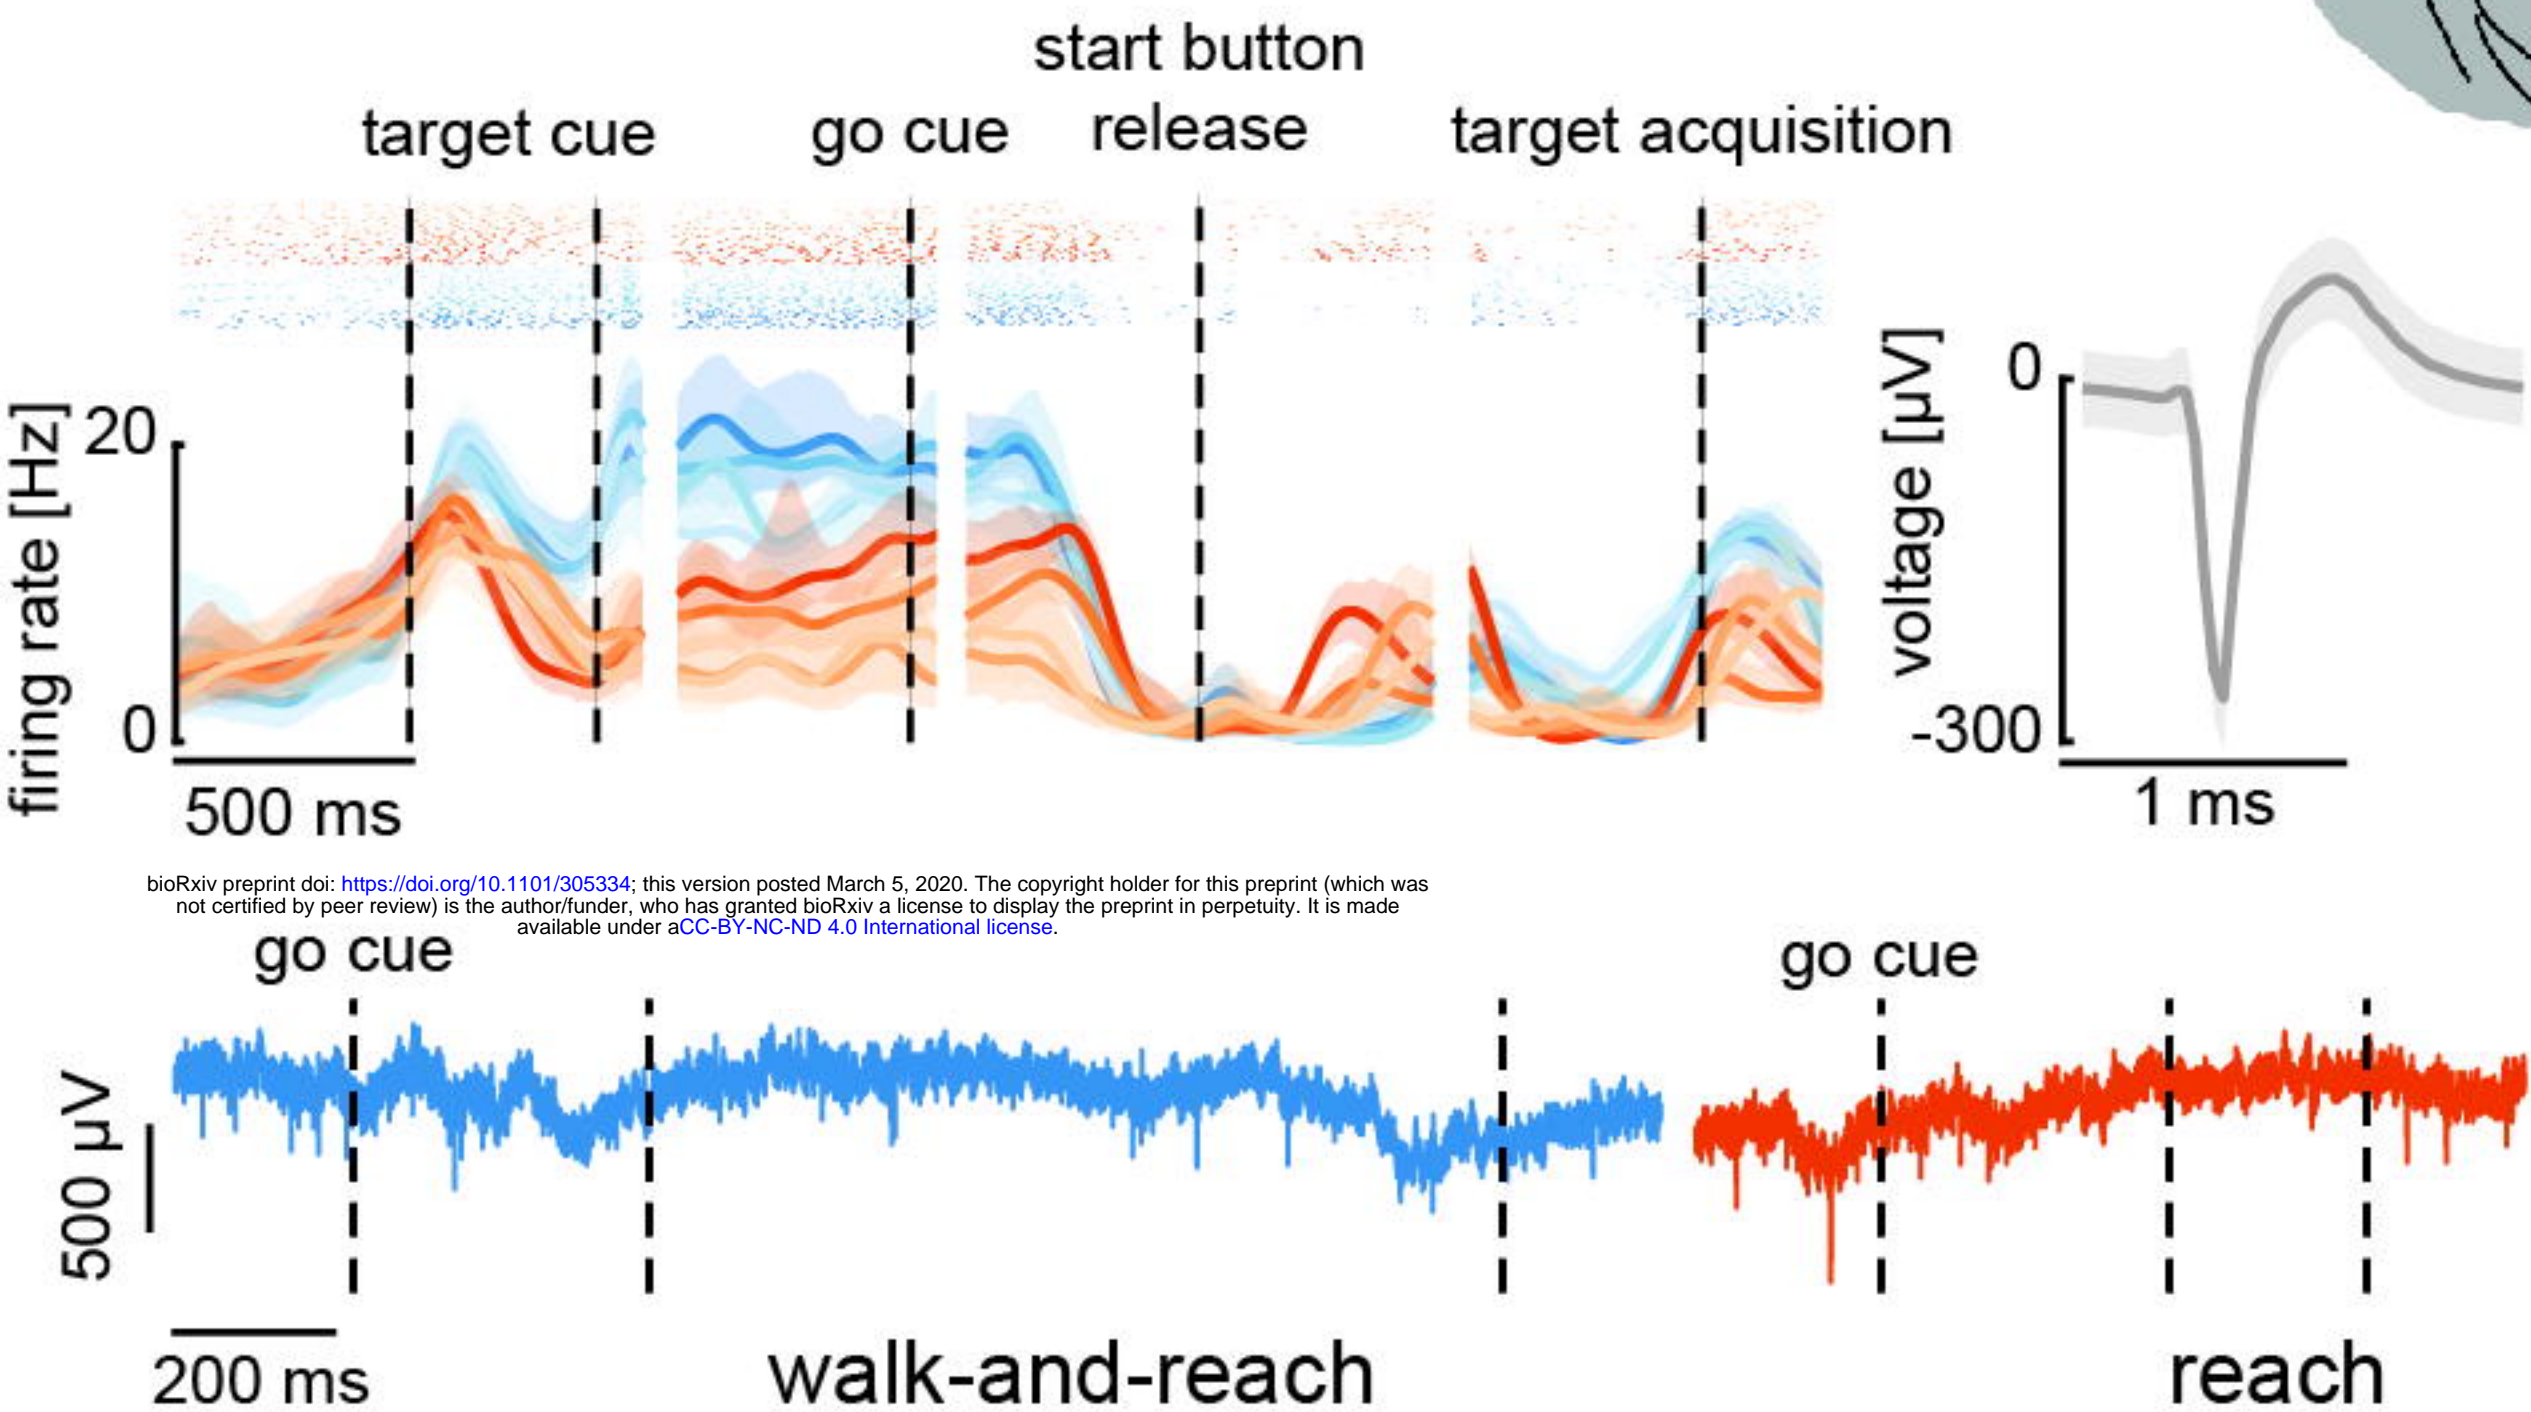

bioRxiv preprint doi: <https://doi.org/10.1101/305334>; this version posted March 5, 2020. The copyright holder for this preprint (which was not certified by peer review) is the author/funder, who has granted bioRxiv a license to display the preprint in perpetuity. It is made available under aCC-BY-NC-ND 4.0 International license.

unit B - monkey K - PMd

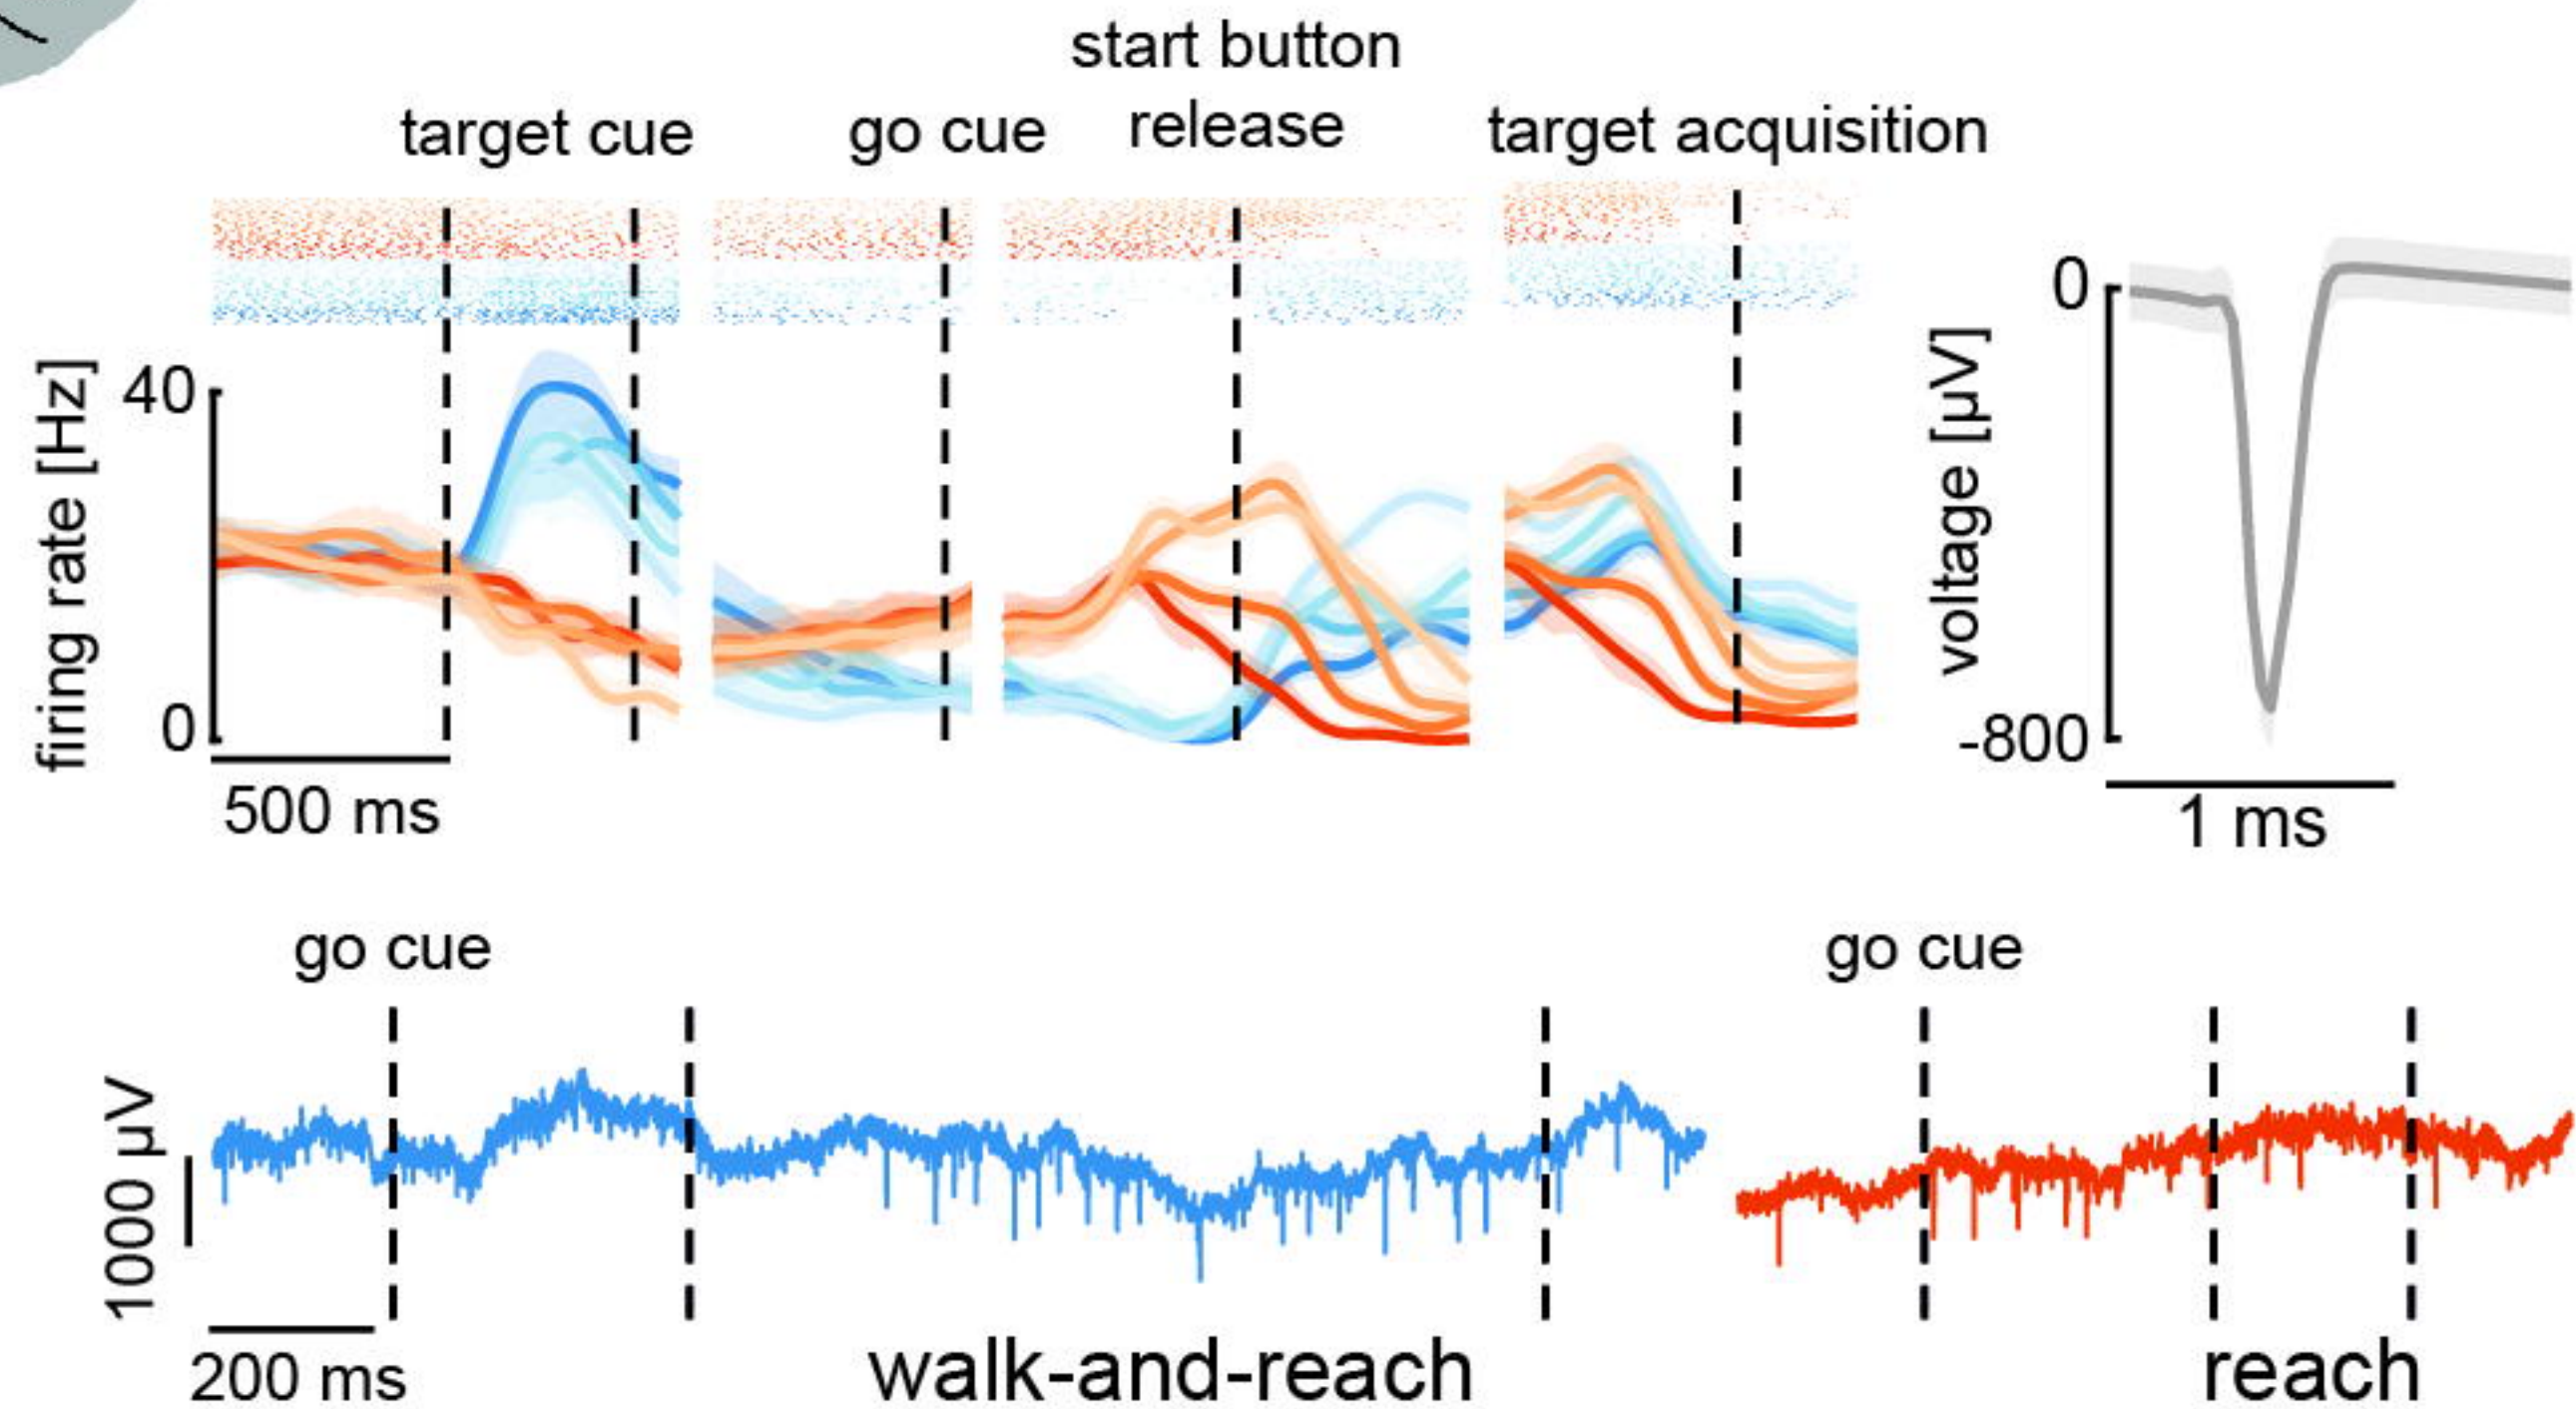

unit C - monkey L - M1

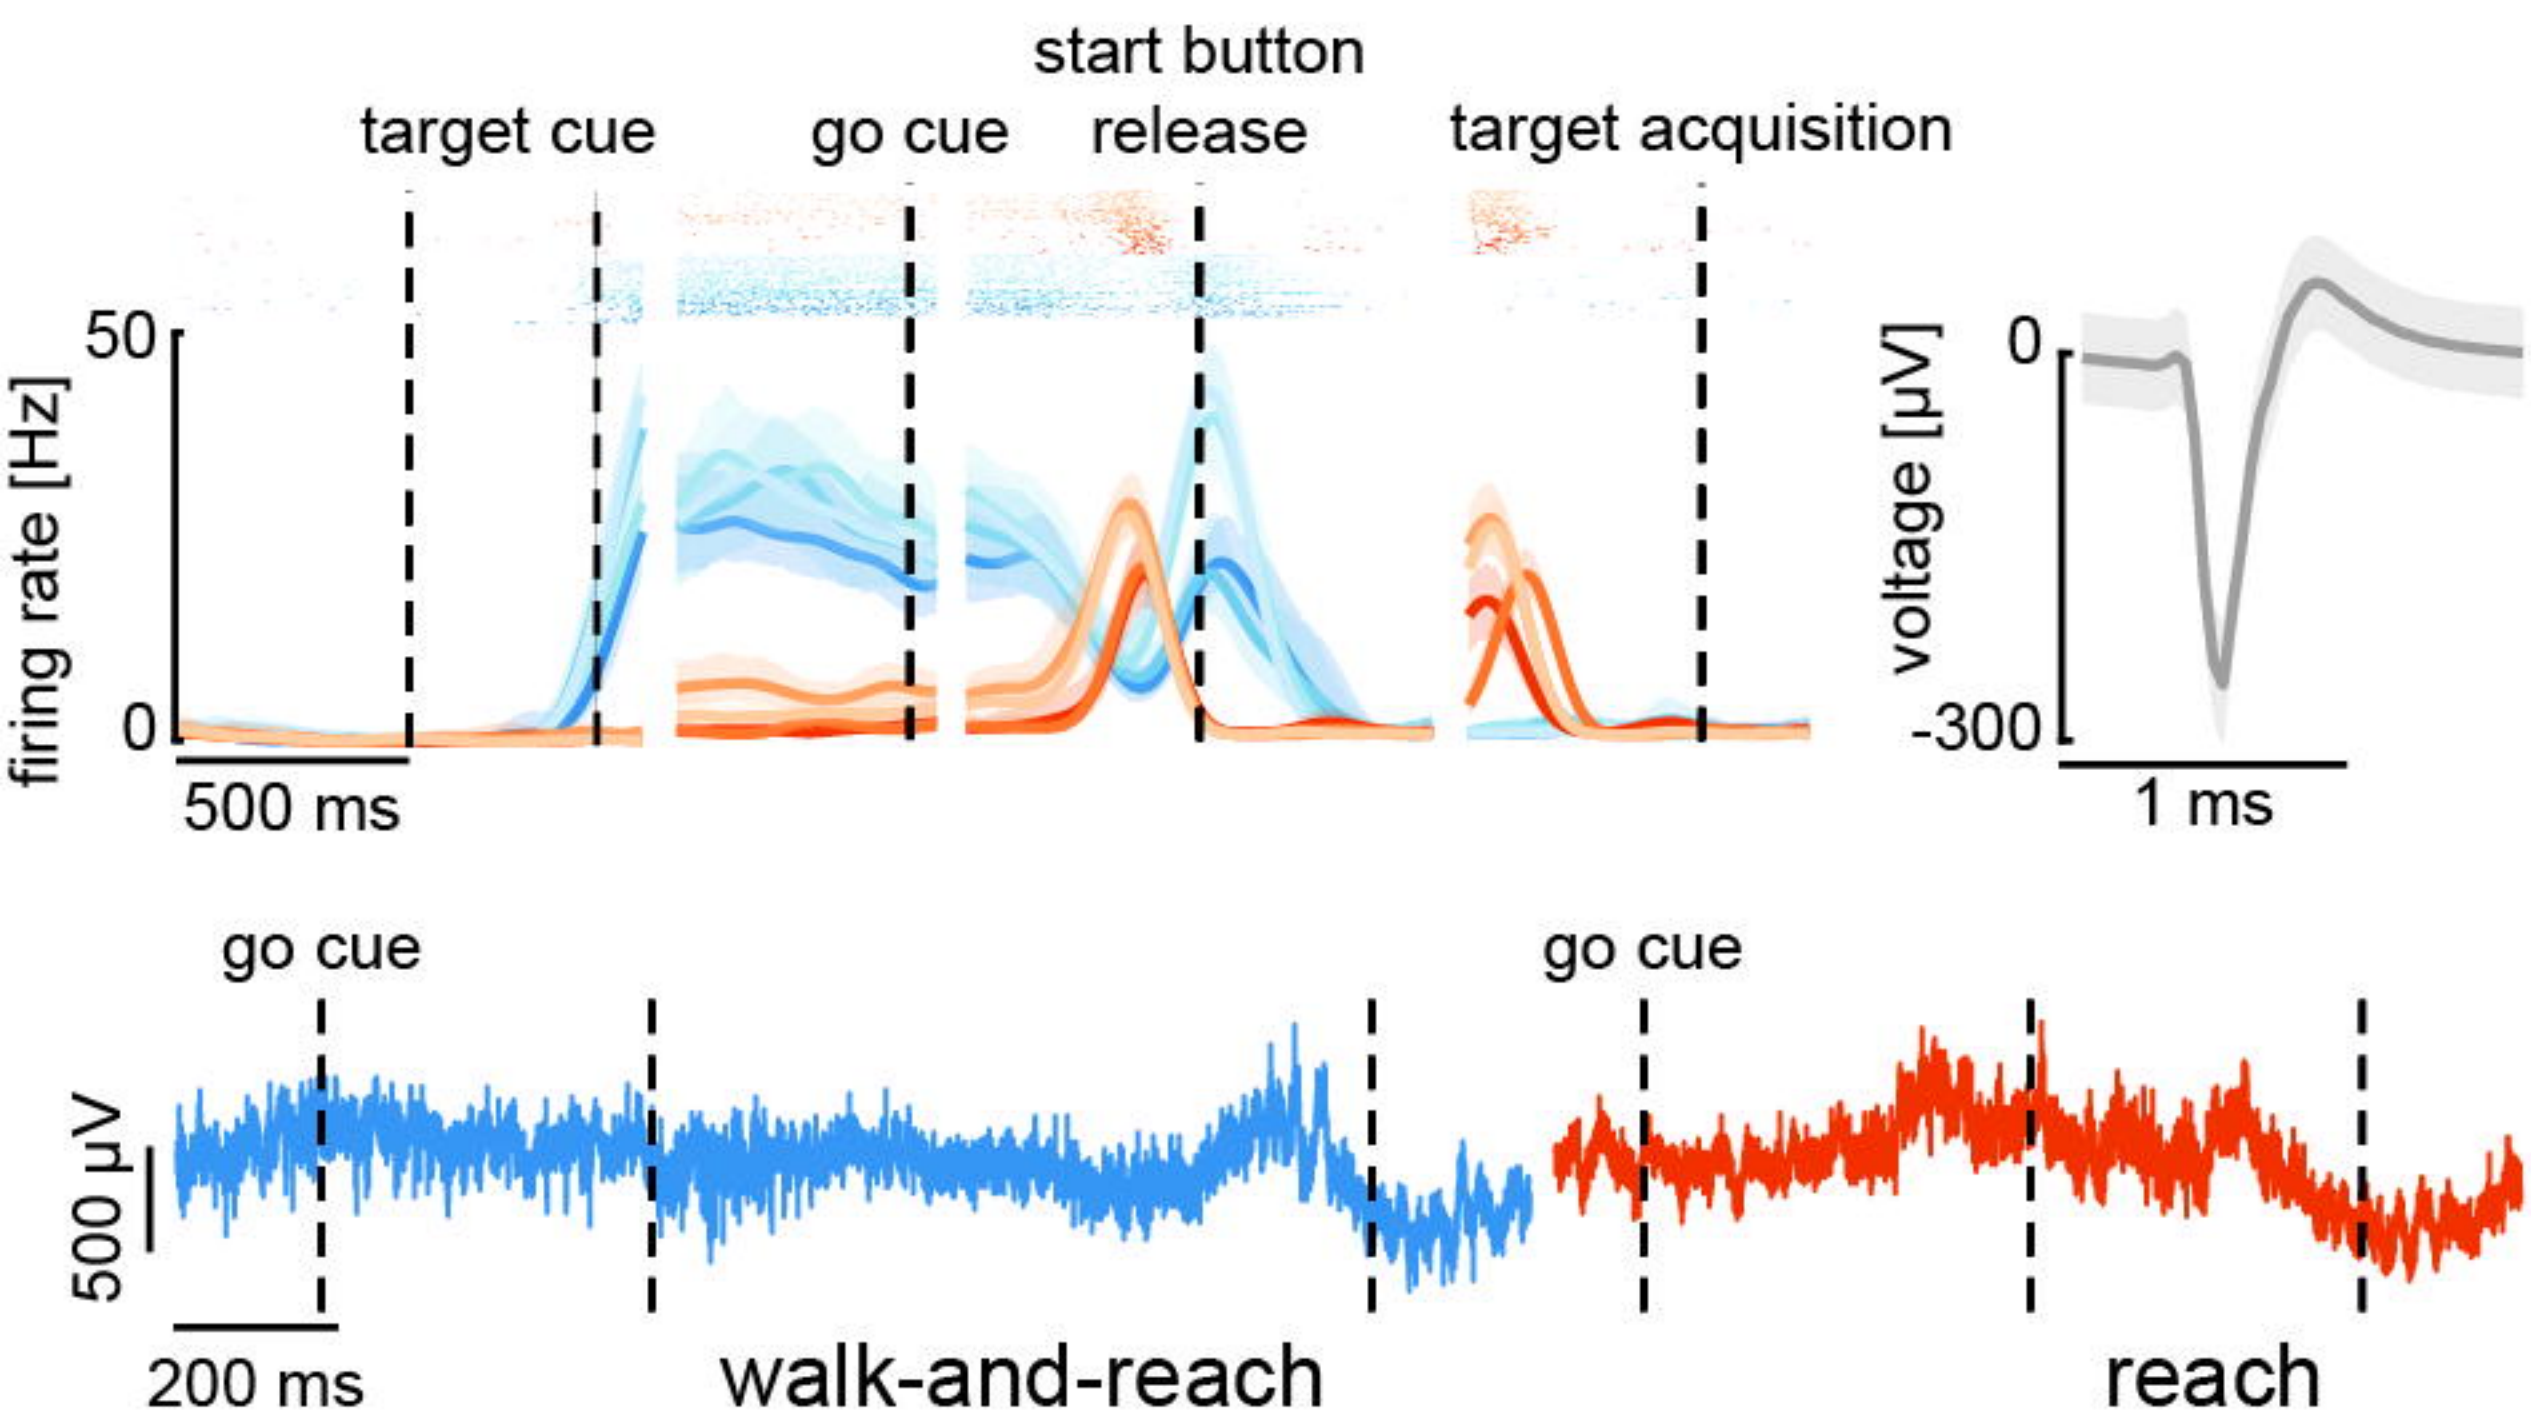

unit D - monkey L - PRR

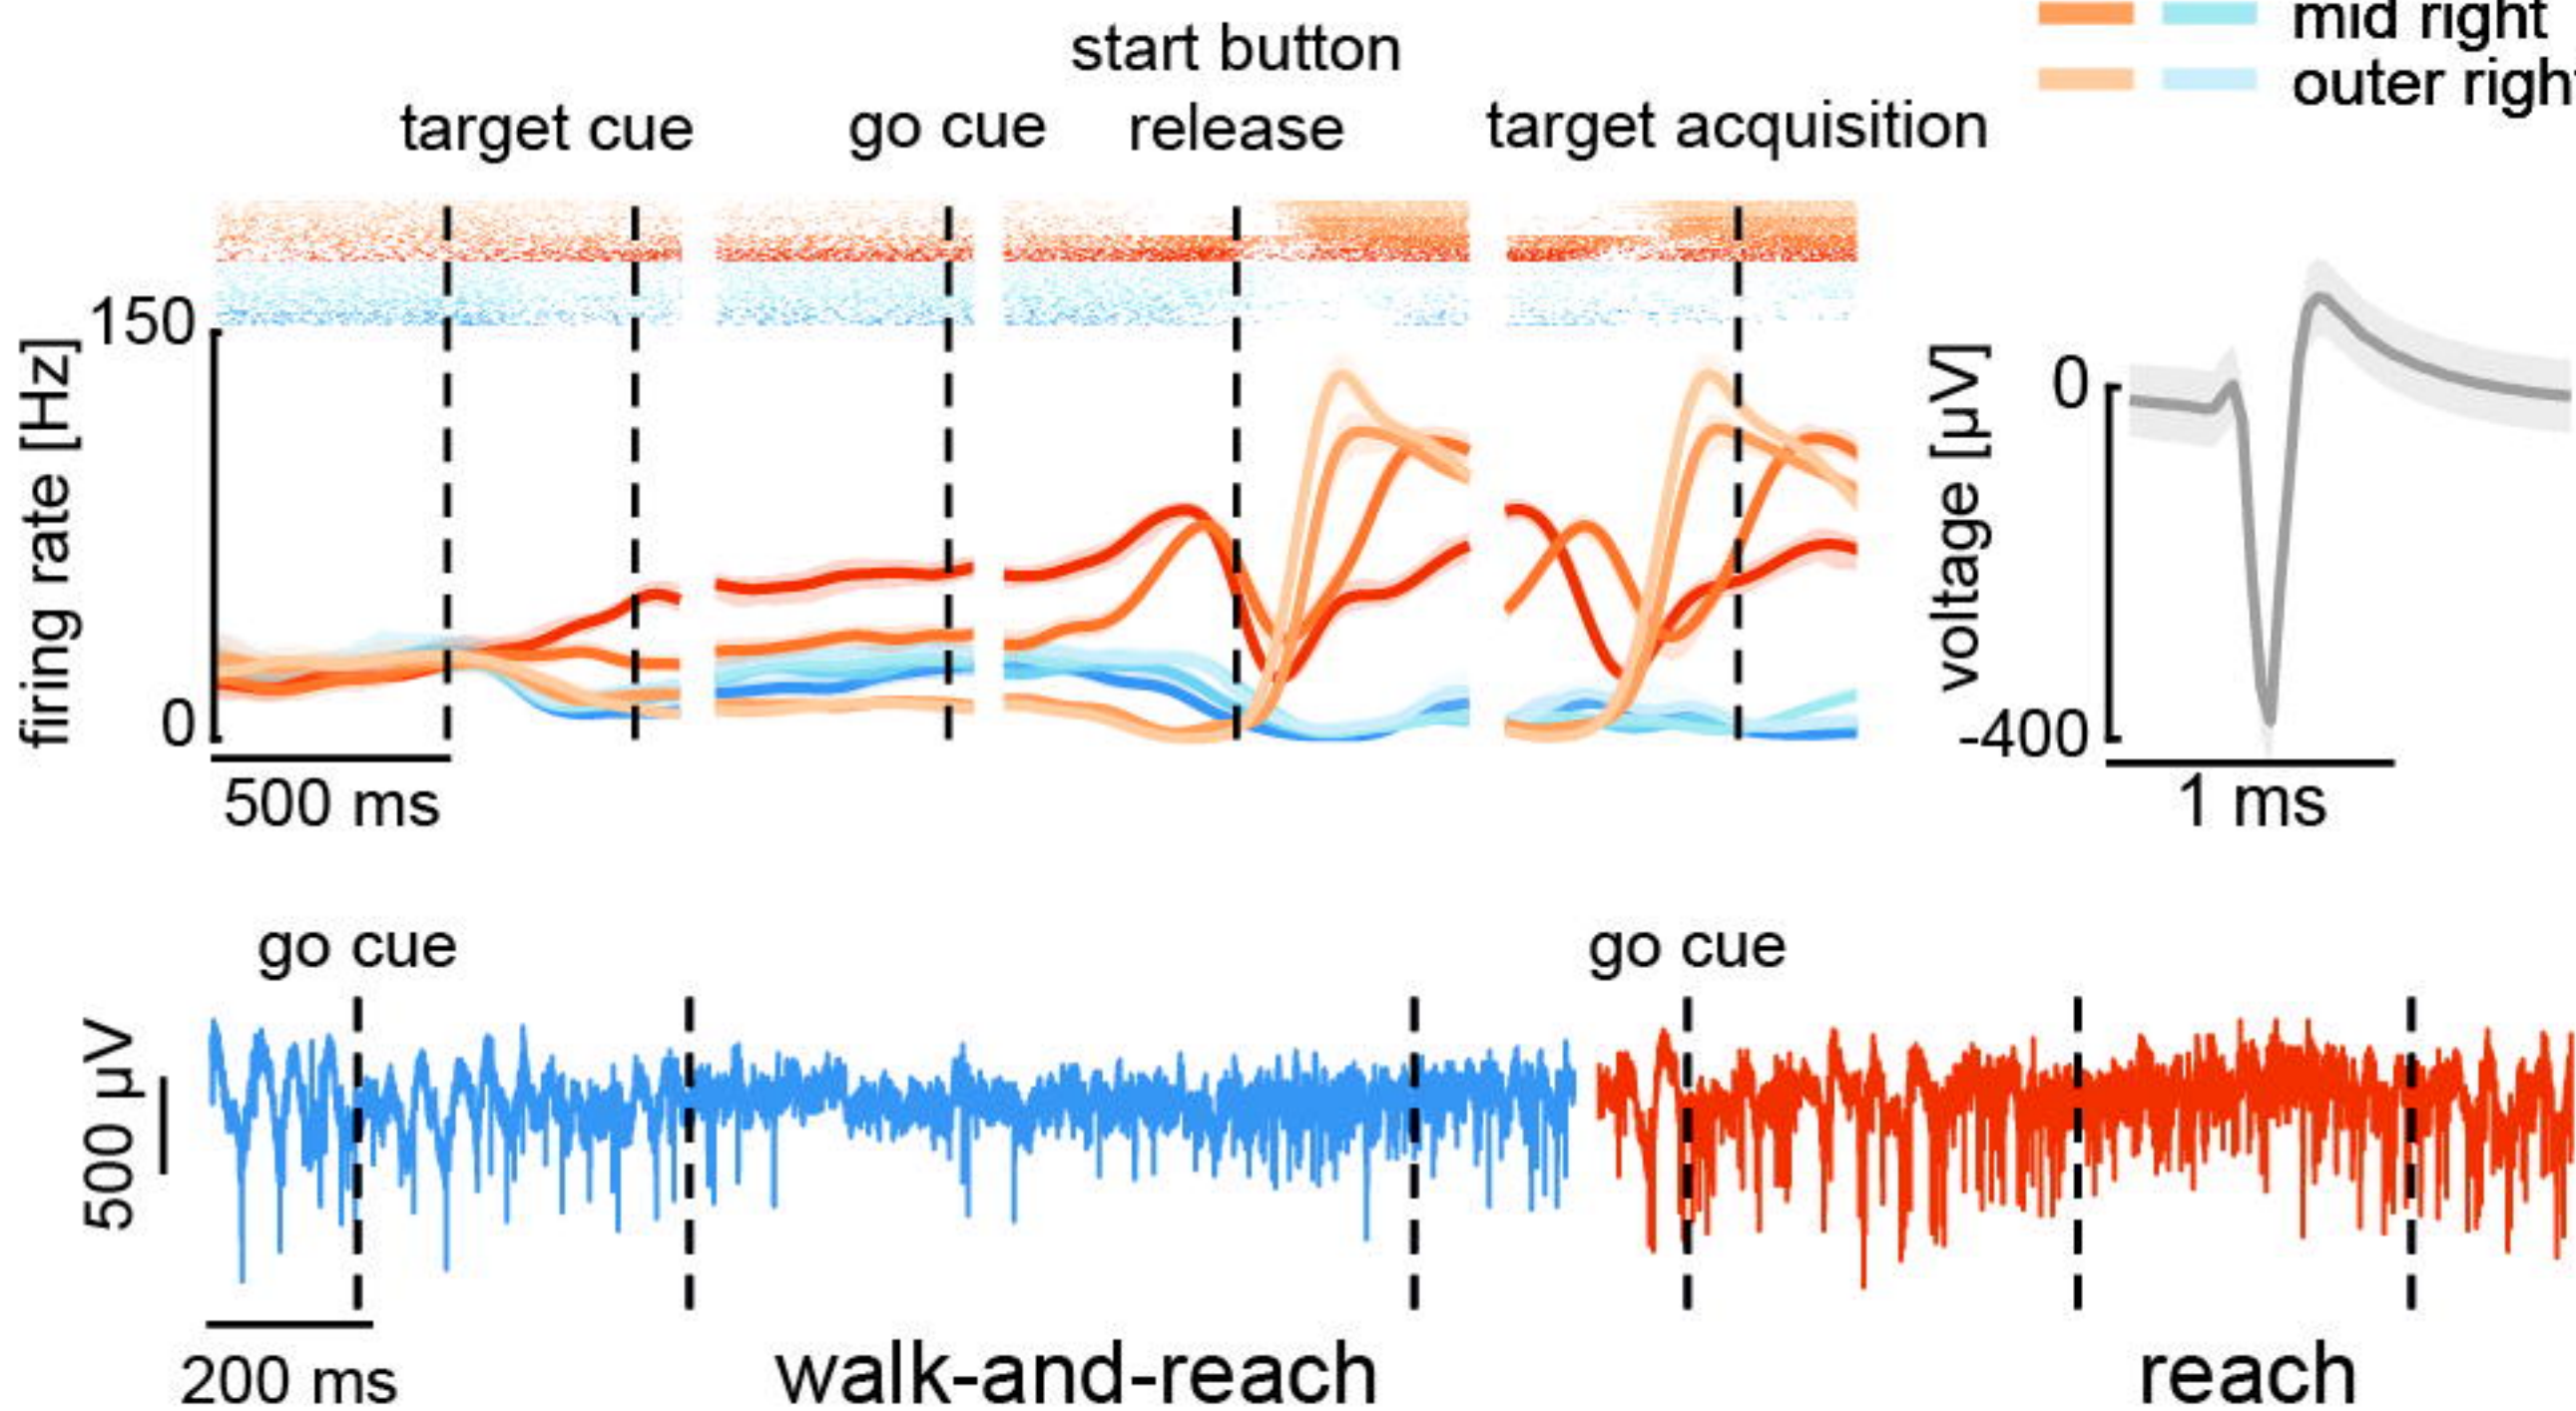

near far

outer left

mid left

mid right

outer right



**A** monkey K

monkey L

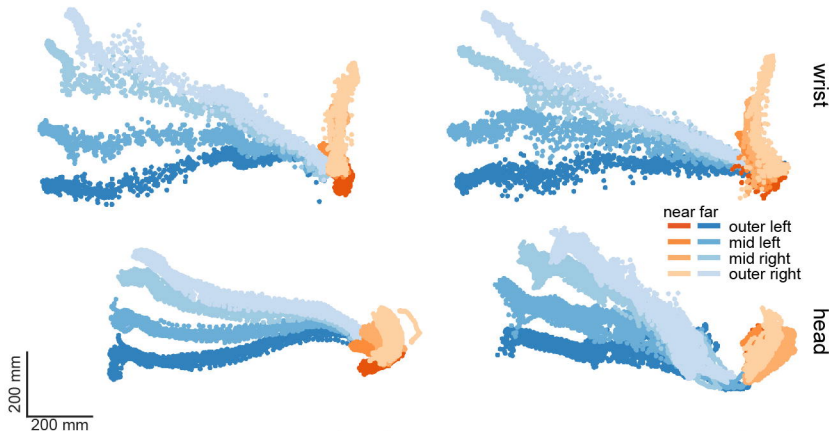**B**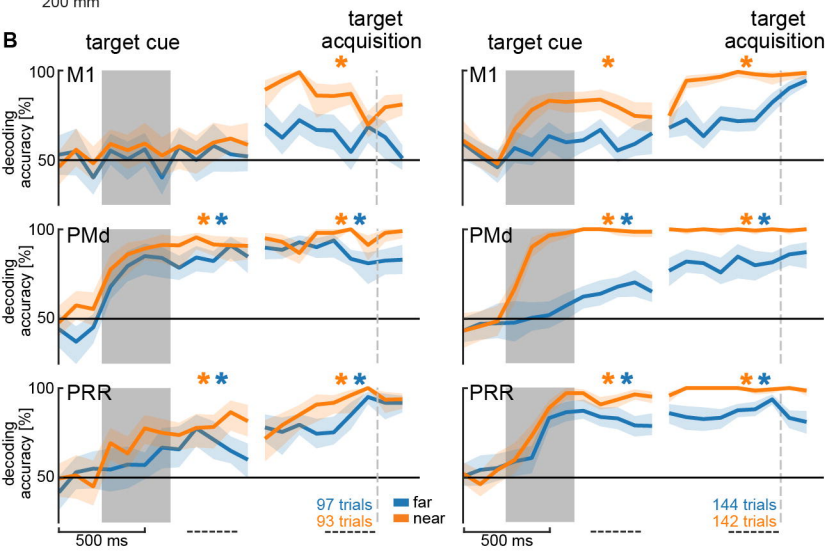



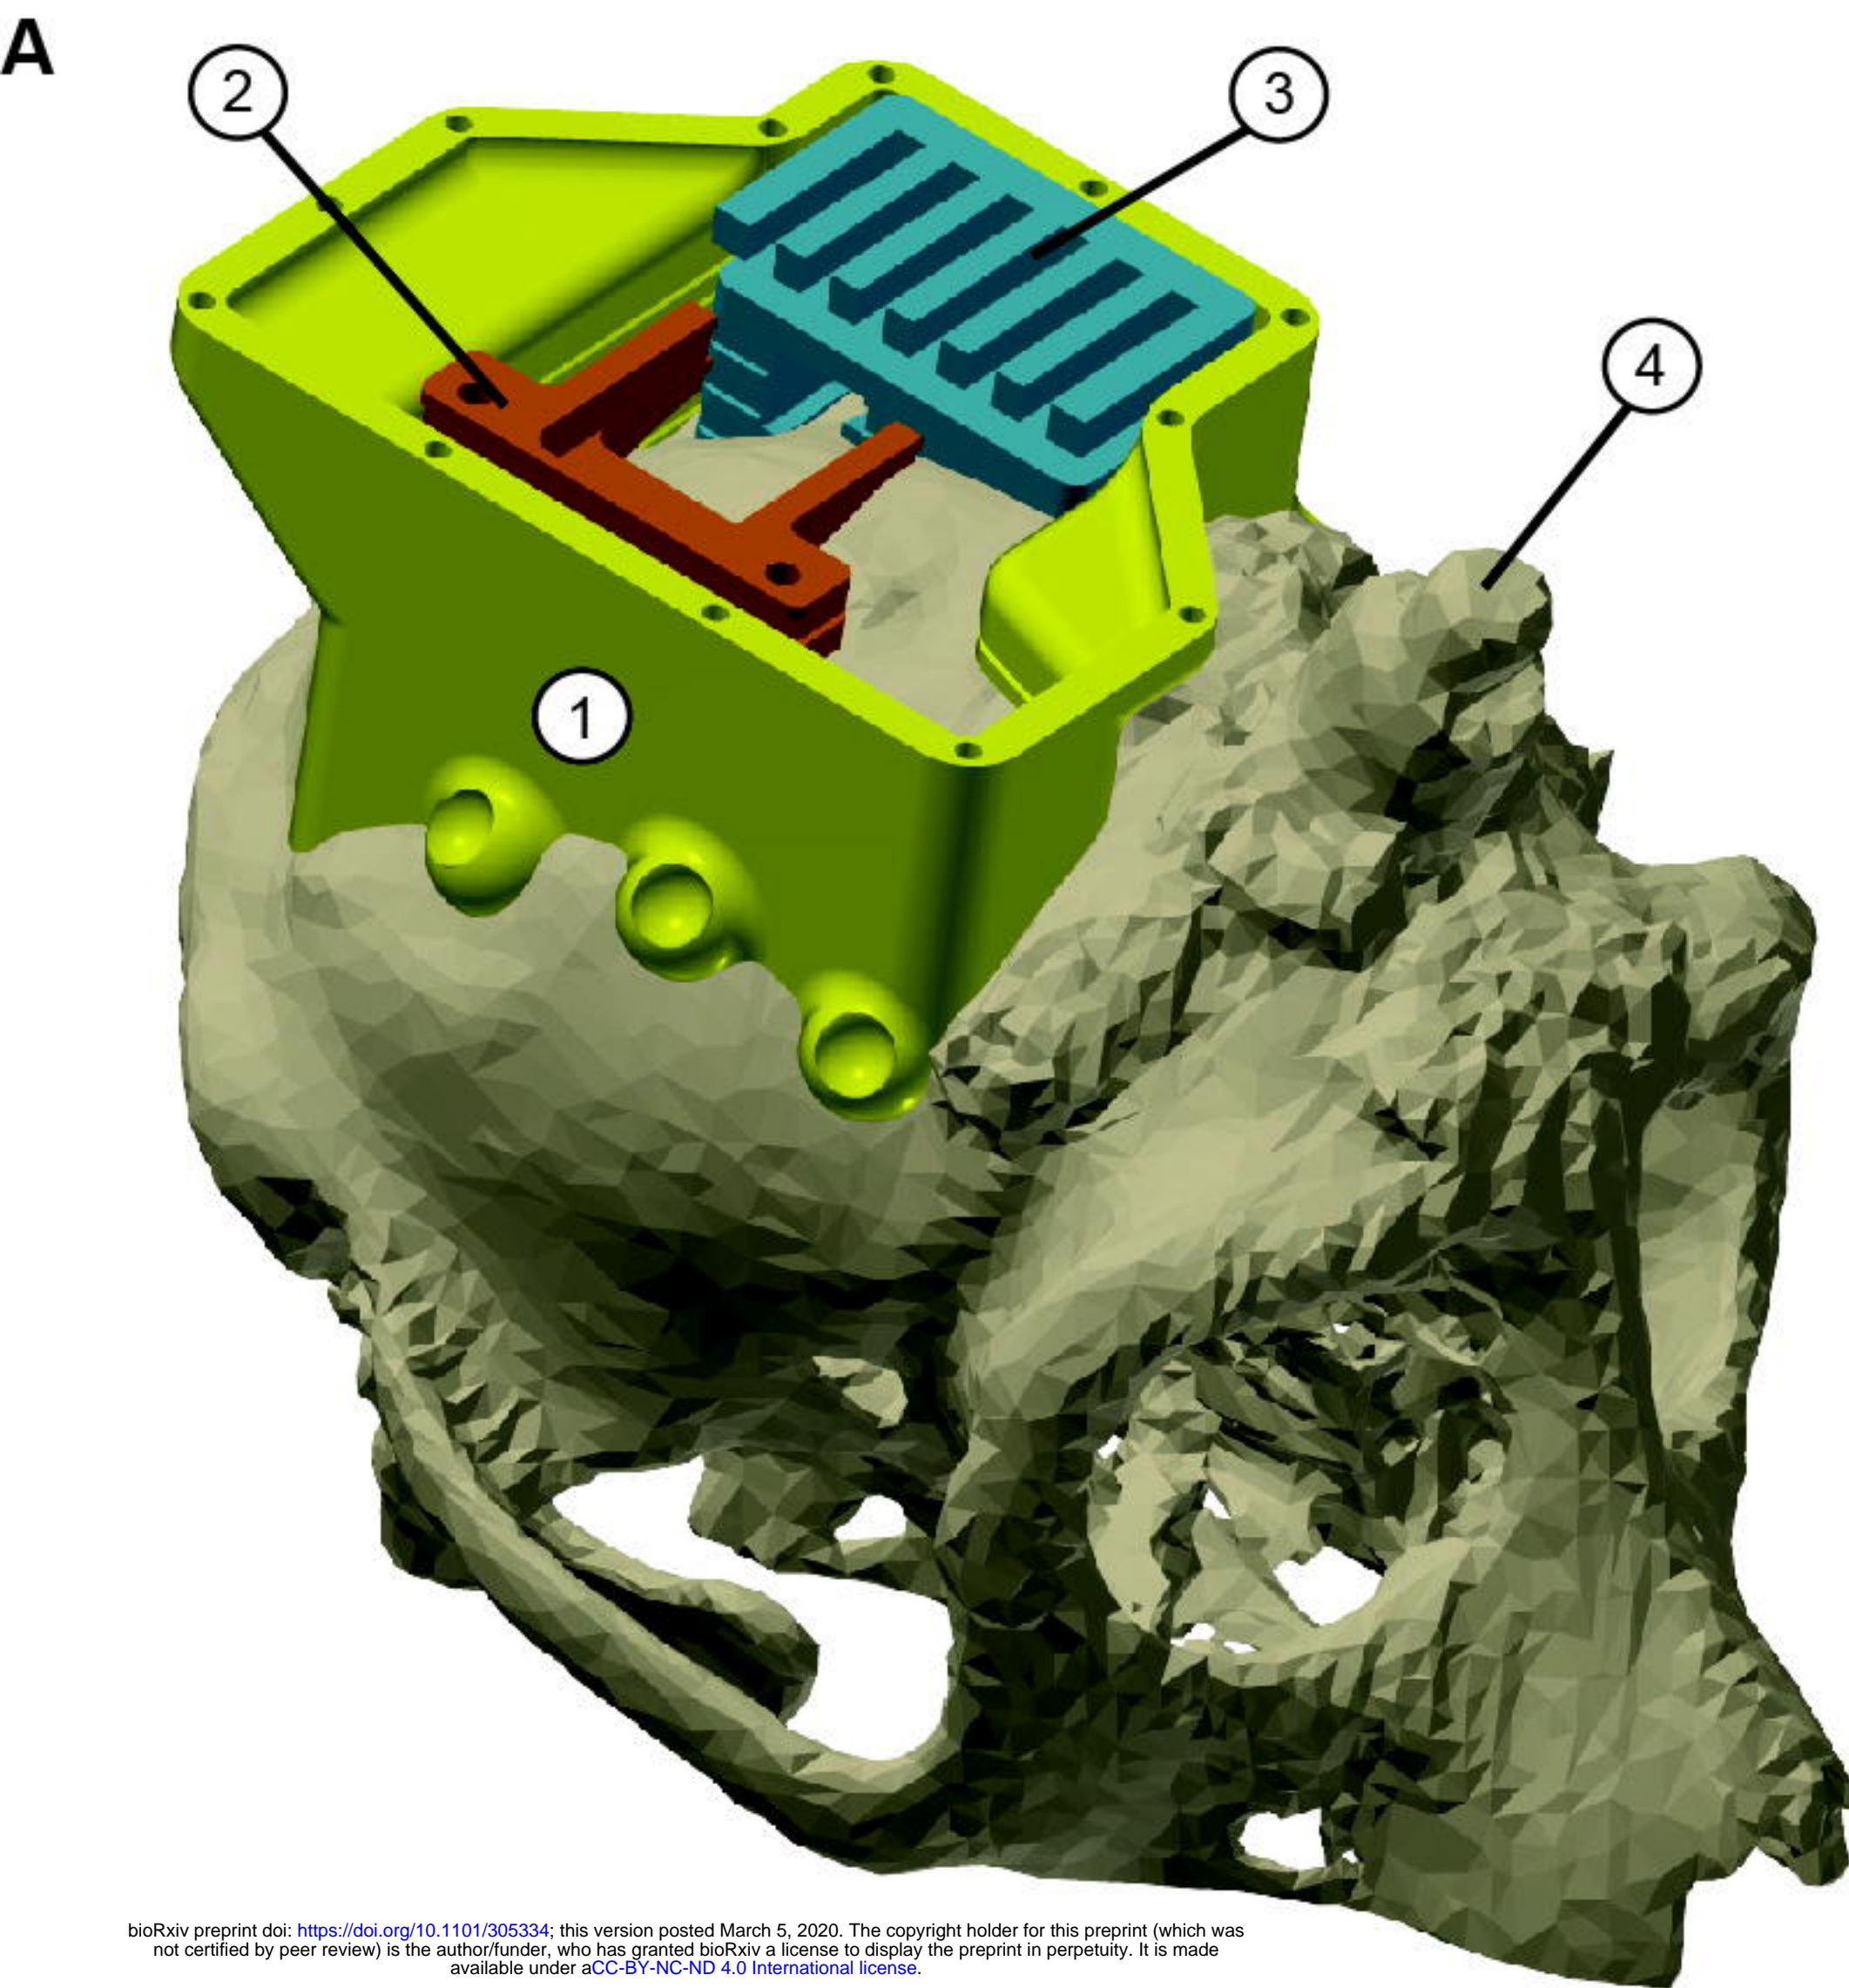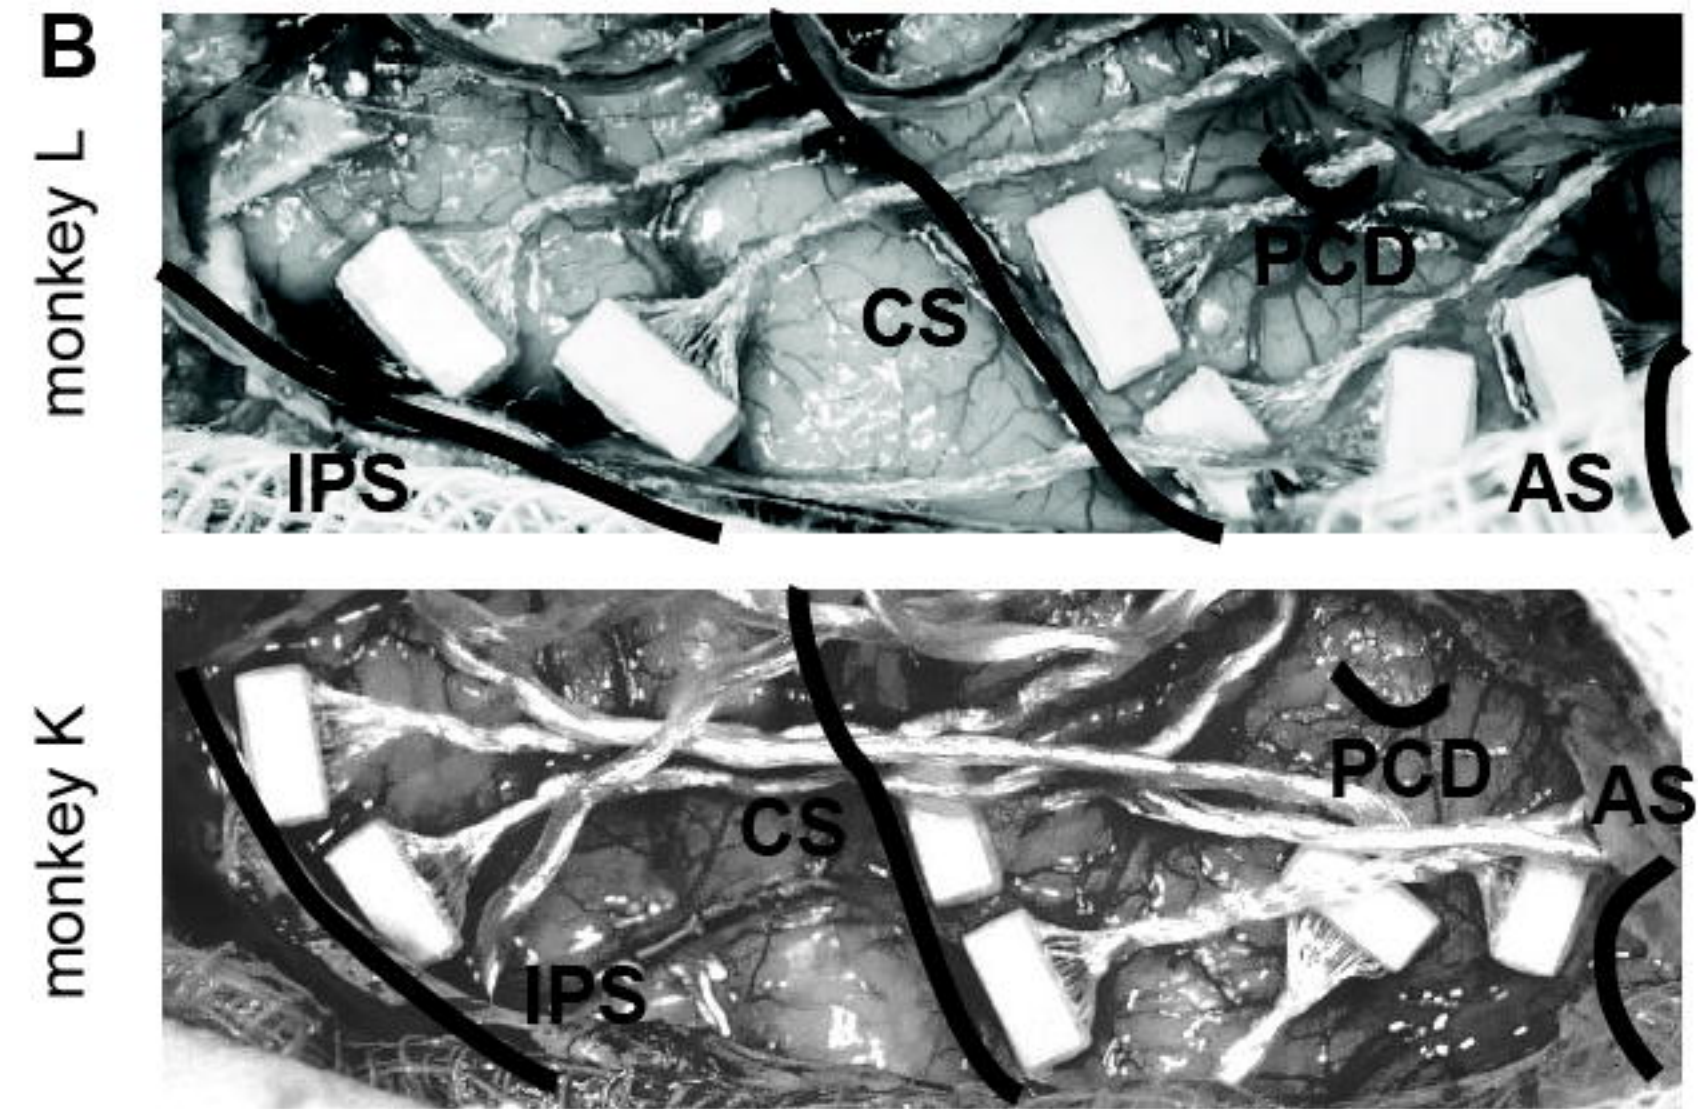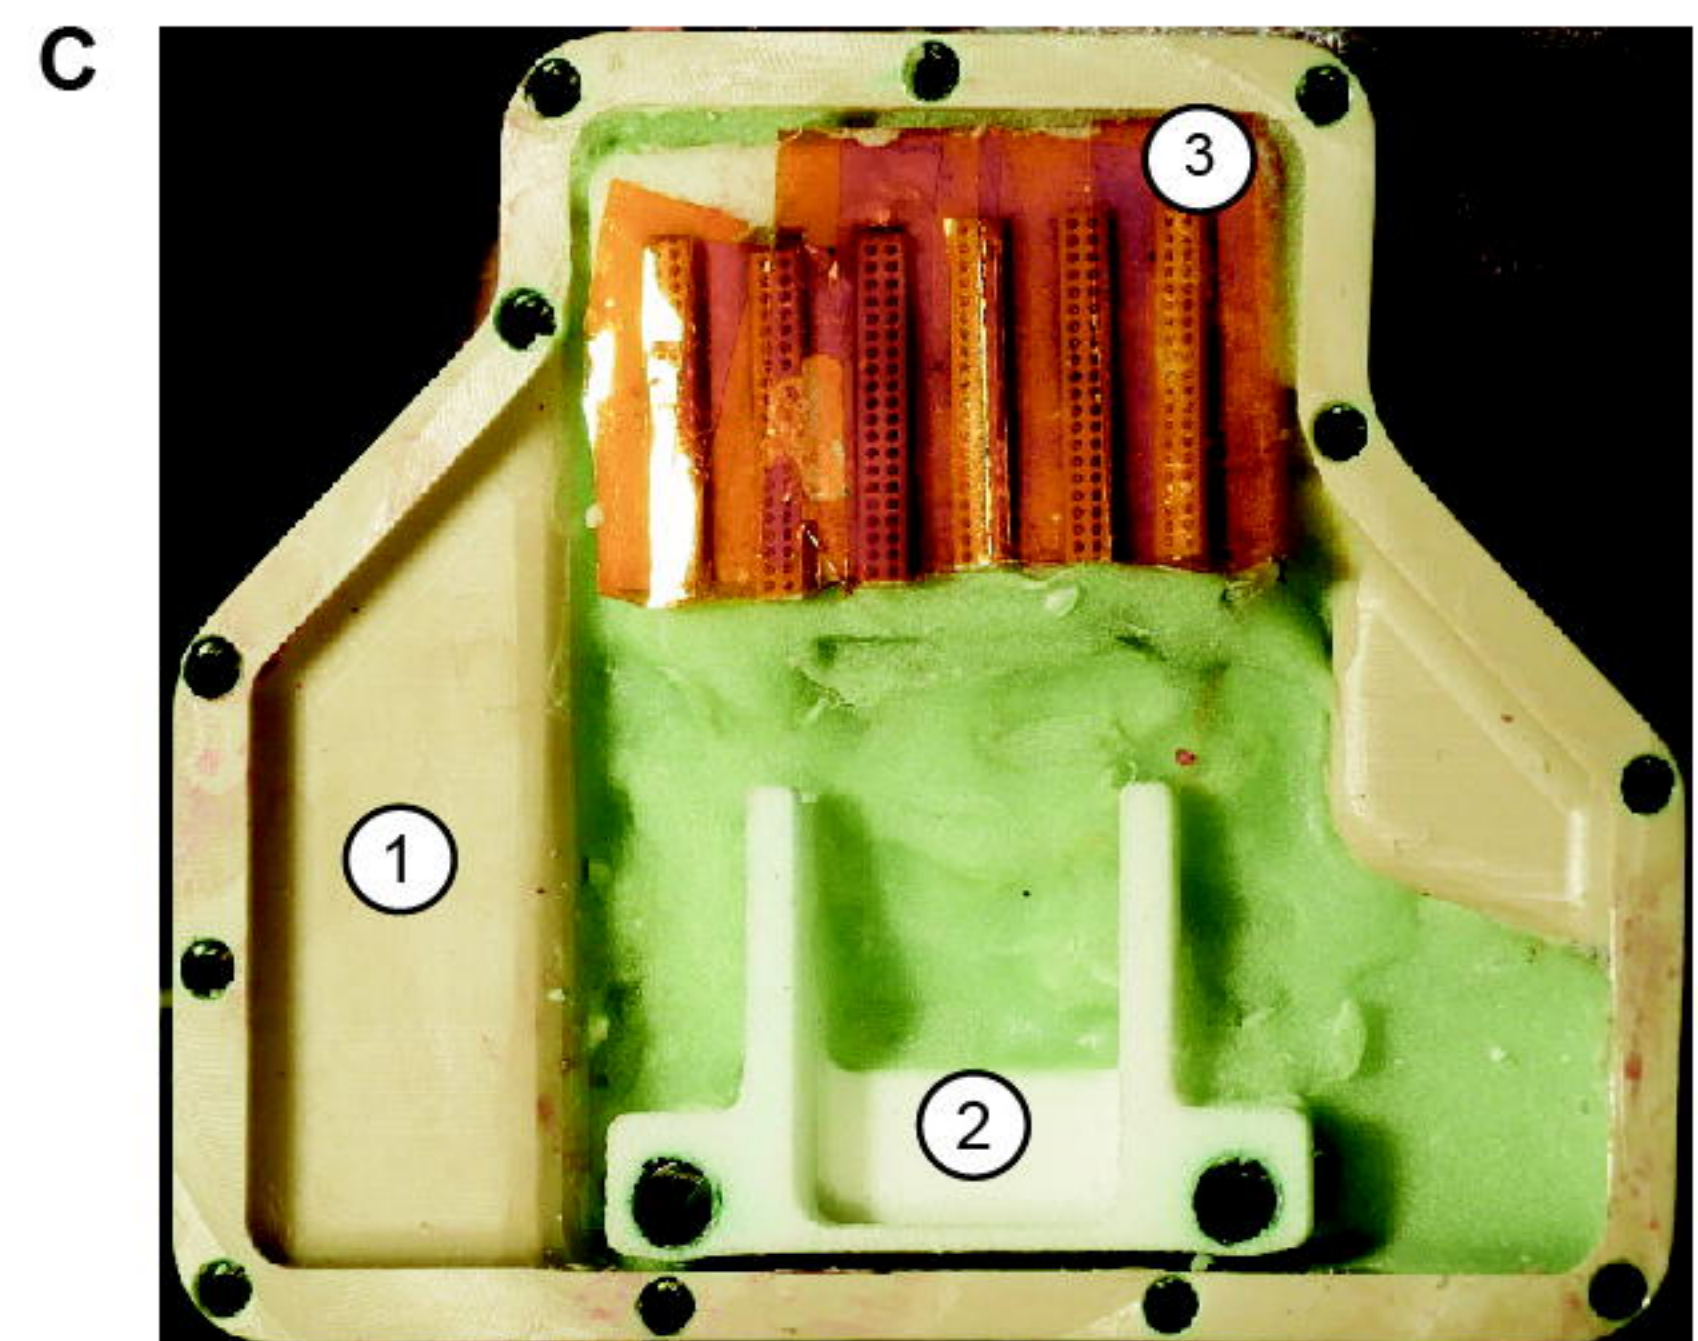

**D not in experiment**

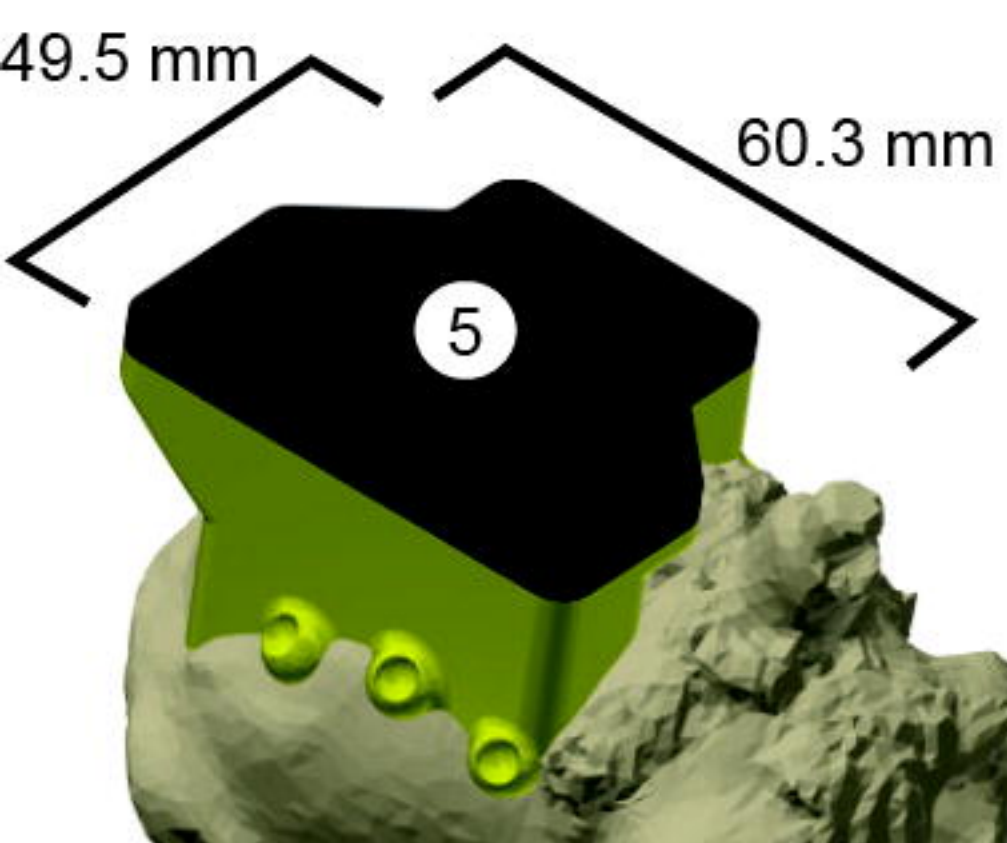

**127-channel**

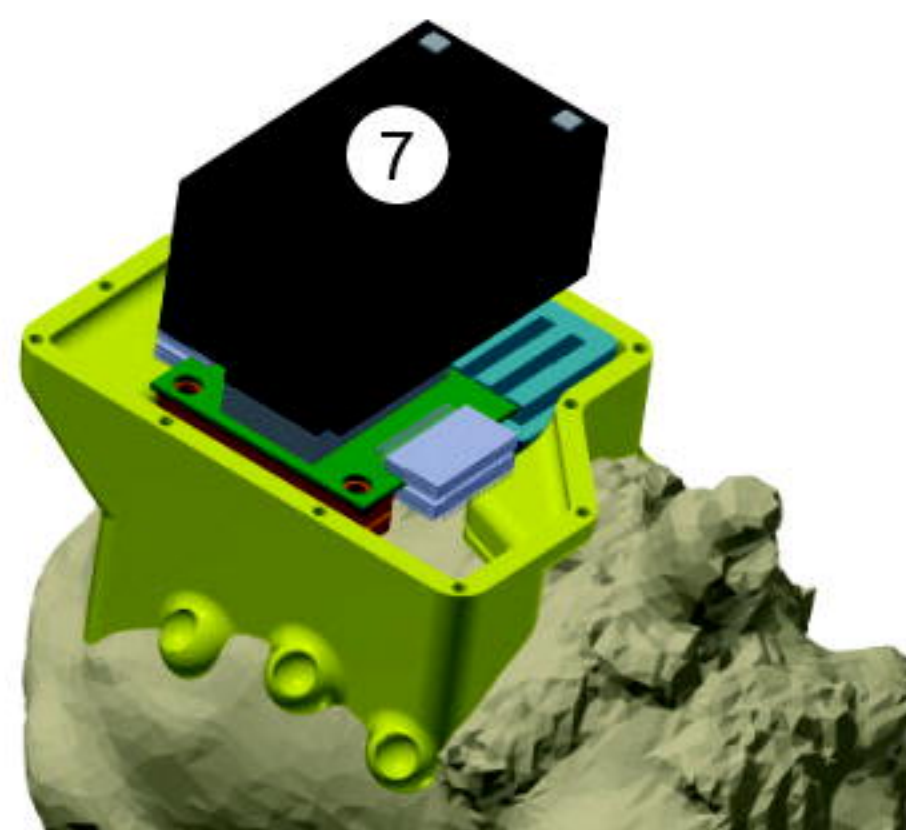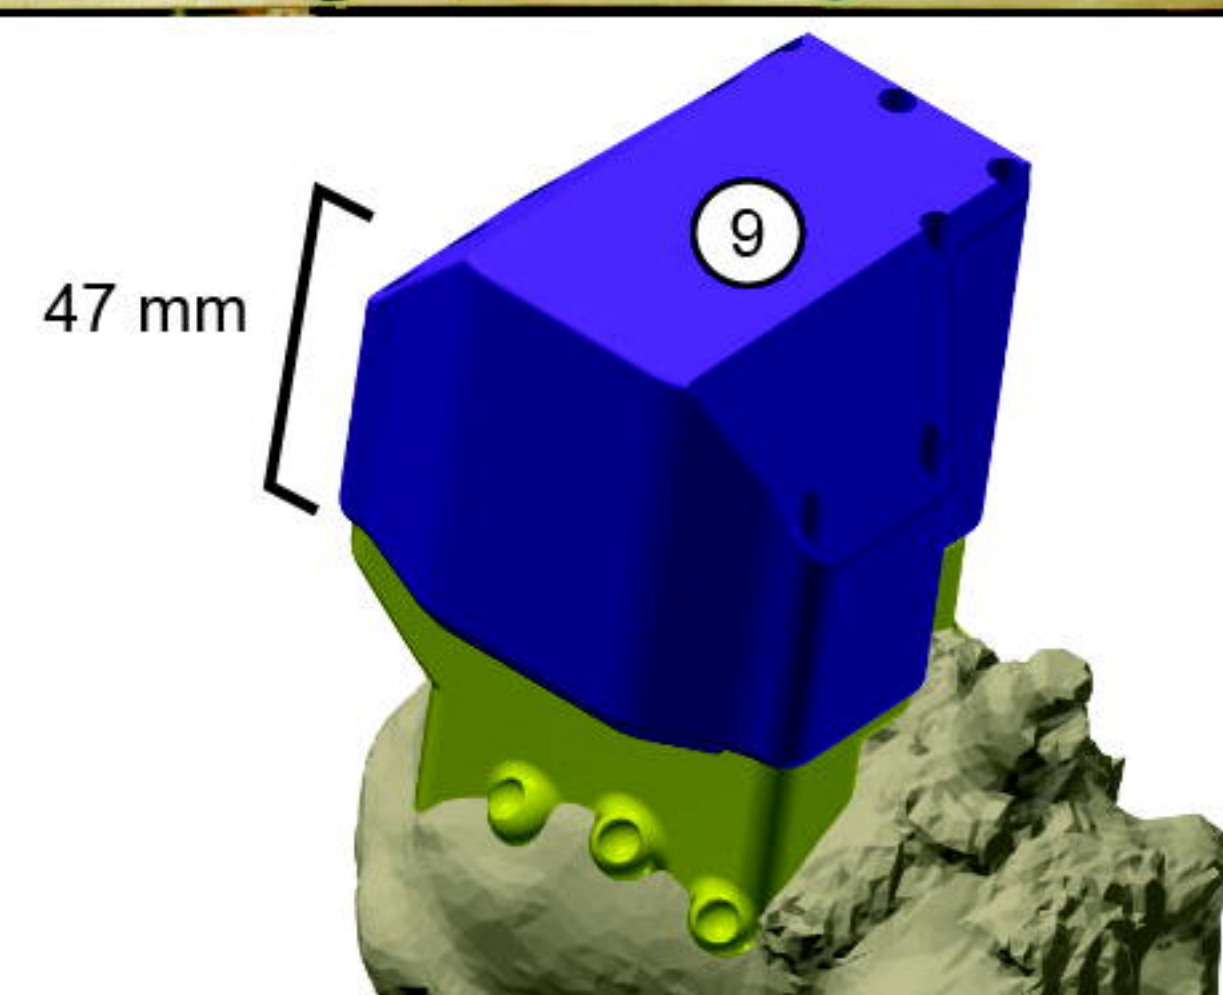

**31-channel**

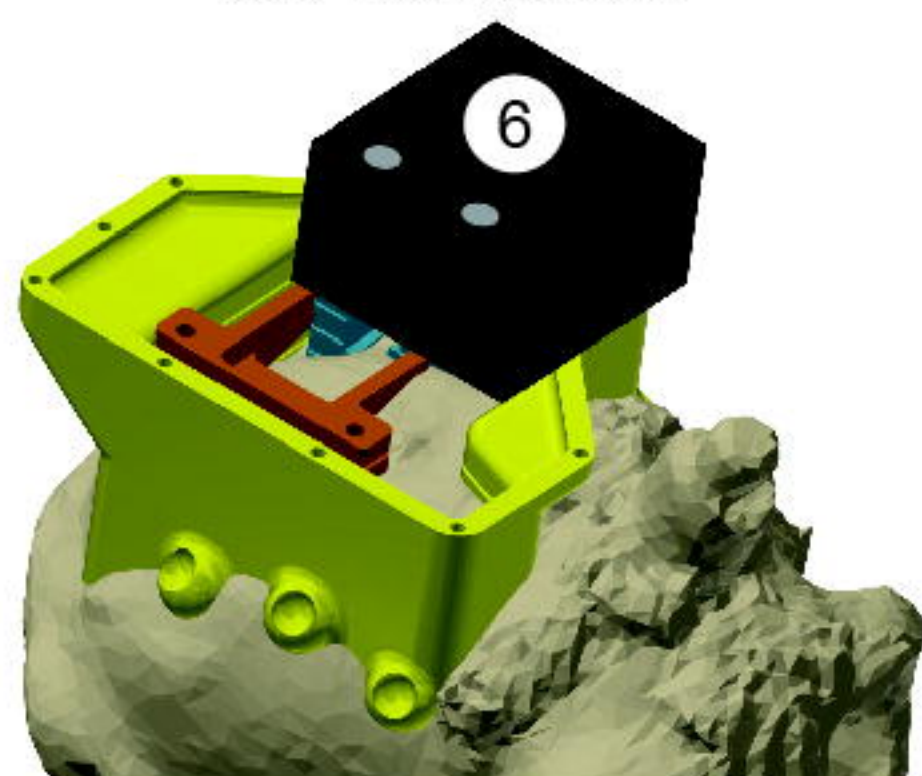

**192-channel**

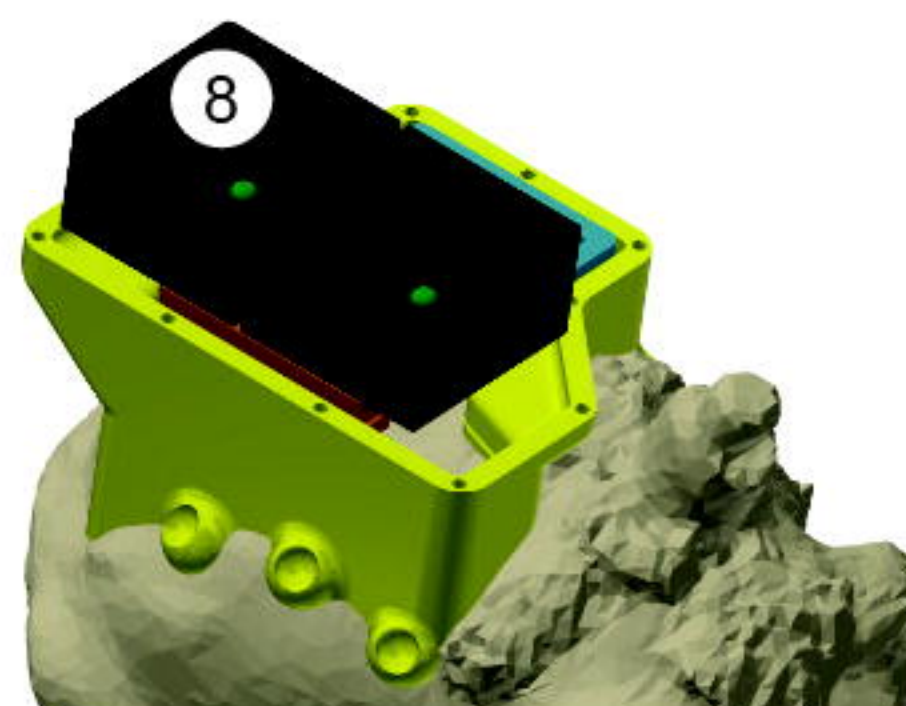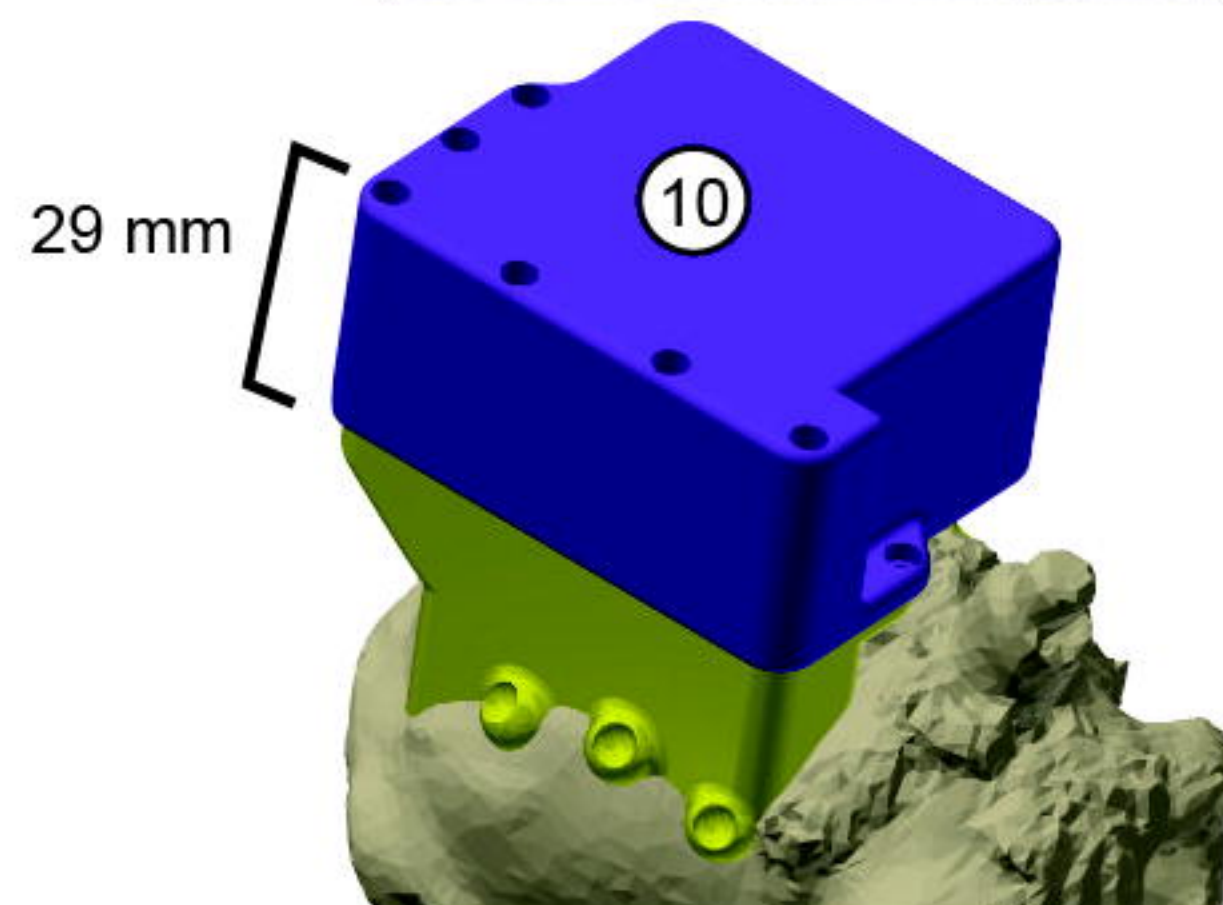



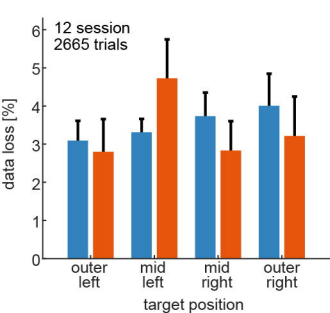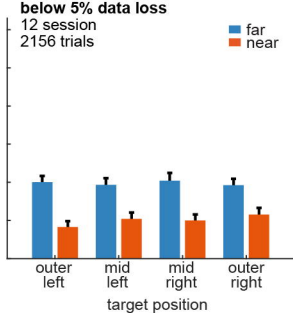



**A** monkey K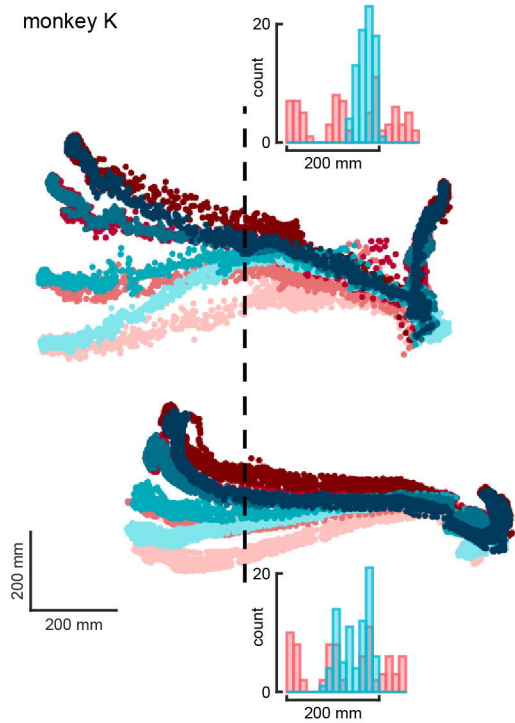

monkey L

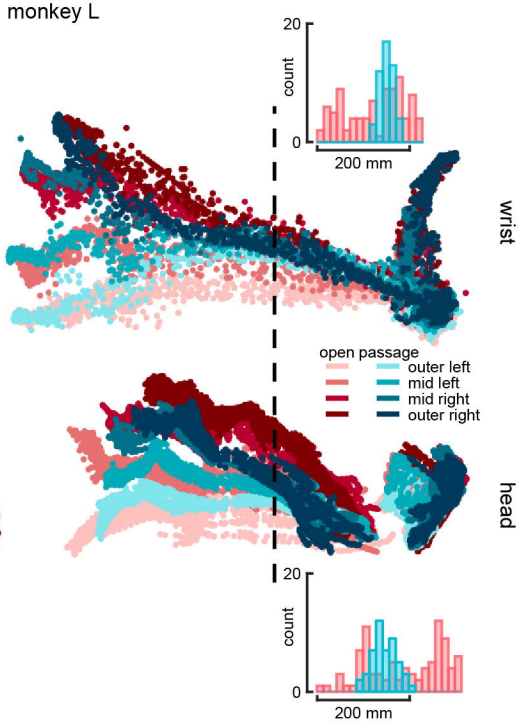**B**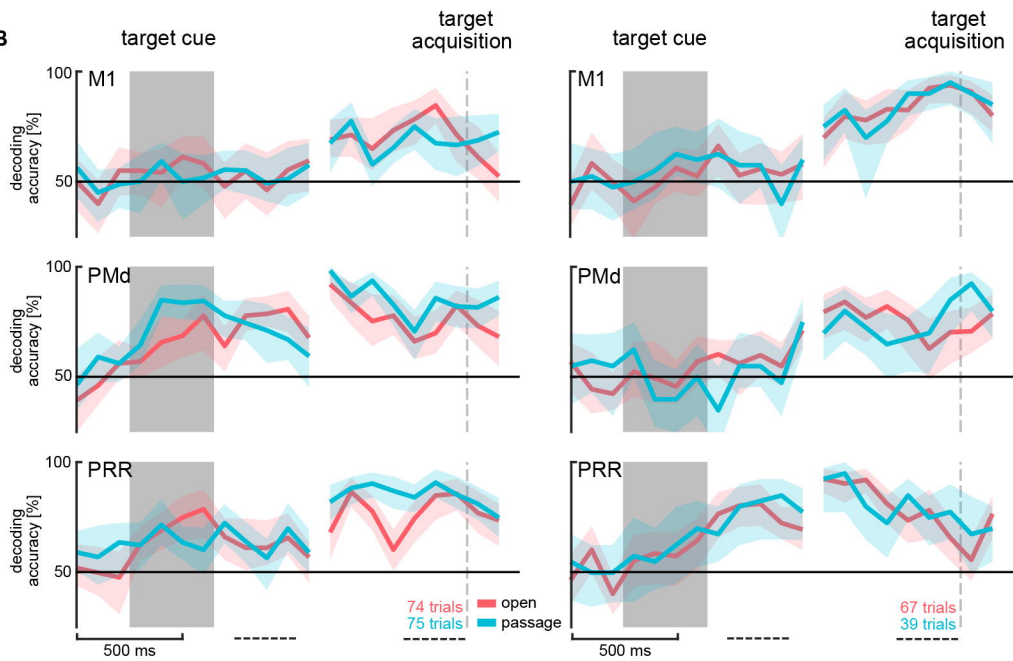

Source: https://www.biorxiv.org/content/10.1101/305334v3.full.pdf
