# Supplementary material for: Wireless recording from unrestrained monkeys reveals motor goal encoding beyond immediate reach in frontoparietal cortex
Source: bioRxiv preprint, doi:10.1101/305334, version 3 (2020-03-05)
Supplement: Figure 4 - source data 2 [file 305334_file12.xlsx]

## Sheet: Tabelle1
Trials < 5% data loss	SumSq	df	Singular	MeanSq	F	p
Distance	0.05	1	0	0.051	279.96	< 0.001 *
Position	0	3	0	0	0.88	0.4502
Distance x Position	0	3	0	0	2.36	0.0696
Error	0.39	2148	0	0
